# Supplementary material for: Cleaner enzymatic production of biodiesel with easy separation procedures triggered by a biocompatible hydrophilic ionic liquid
Source: Royal Society of Chemistry journal article supplement (doi:10.1039/c9gc03796a), 2020-01-01
Supplement: c9gc03796a1.pdf [file c9gc03796a1.pdf]

## Supporting informations

### **Cleaner enzymatic production of biodiesel with easy separation procedures triggered by a biocompatible hydrophilic ionic liquid**

Anlian Zhu,\* Wanlu Feng, Zhiyong Li, Shuang Cheng, Qianhan Chen, Dongshuang  
Fan, Yuanyang Guo, Lingjun Li,\* Jianji Wang\*

School of Chemistry and Chemical Engineering, Key Laboratory of Green Chemical  
Media and Reactions, Ministry of Education, Collaborative Innovation Center of  
Henan Province for Green Manufacturing of Fine Chemicals, Henan Normal  
University, Xinxiang, Henan 453007, P. R. China  
alzhuchem@126.com; lingjunlee@htu.cn; jwang@htu.cn

|                                                                                                 |        |
|-------------------------------------------------------------------------------------------------|--------|
| <sup>1</sup> HNMR, <sup>13</sup> CNMR and FT-IR spectra data for the utilized ionic liquid..... | P2-9   |
| Spectrum for the utilized ionic liquids.....                                                    | P10-42 |
| Mass-spectrometry data of the biodiesel products.....                                           | P43-48 |

1. [TMA][H<sub>2</sub>PO<sub>4</sub>]

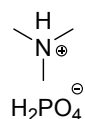

<sup>1</sup>H NMR (400 MHz, D<sub>2</sub>O) δ 2.66 (s, 9H) ppm; <sup>13</sup>C NMR (100 MHz, D<sub>2</sub>O) δ 44.5 ppm.  
IR: ν 2924, 2364, 1642, 1534, 1483, 1228, 1042, 936, 482 cm<sup>-1</sup>.

2. [TEA][H<sub>2</sub>PO<sub>4</sub>]

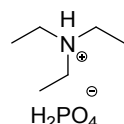

<sup>1</sup>H NMR (400 MHz, D<sub>2</sub>O) δ 2.42 (m, 6H), 0.51 (t, *J* = 6.3 Hz, 9H) ppm; <sup>13</sup>C NMR (100 MHz, D<sub>2</sub>O) δ 45.9, 7.8 ppm.  
IR: ν 3277, 2925, 2364, 1643, 1531, 1453, 1398, 1228, 1043, 945, 877, 837, 501 cm<sup>-1</sup>.

3. [TEOA][H<sub>2</sub>PO<sub>4</sub>]

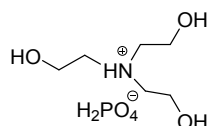

<sup>1</sup>H NMR (400 MHz, D<sub>2</sub>O) δ 3.91 (t, *J* = 4.0 Hz, 6H), 3.44 (t, *J* = 4.0 Hz, 6H) ppm;  
<sup>13</sup>C NMR (100 MHz, D<sub>2</sub>O) δ 55.2, 54.9 ppm.  
IR: ν 3278, 2925, 1631, 1535, 1445, 1378, 1209, 1057, 932, 875, 689, 537, 496 cm<sup>-1</sup>.

4. [EOA][H<sub>2</sub>PO<sub>4</sub>]

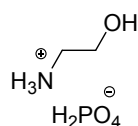

<sup>1</sup>H NMR (400 MHz, D<sub>2</sub>O) δ 3.78 - 3.75 (m, 2H), 3.10 - 3.07 (m, 2H) ppm; <sup>13</sup>C NMR (100 MHz, D<sub>2</sub>O) δ 57.5, 41.2 ppm.  
IR: ν 2749, 2168, 1636, 1501, 1456, 1344, 1205, 1135, 1112, 1075, 1014, 969, 933, 763, 550, 525, 491, 433 cm<sup>-1</sup>.

5. [MDEOA][H<sub>2</sub>PO<sub>4</sub>]

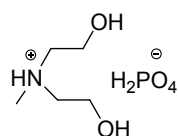

$^1\text{H}$  NMR (400 MHz,  $\text{D}_2\text{O}$ )  $\delta$  3.94 (td,  $J = 5.3, 1.0$  Hz, 4H), 3.37 (s, 4H), 2.96 (d,  $J = 1.1$  Hz, 3H) ppm;  $^{13}\text{C}$  NMR (100 MHz,  $\text{D}_2\text{O}$ )  $\delta$  57.3, 55.1, 40.4 ppm.  
 IR:  $\nu$  2767, 2334, 1643, 1466, 1062, 943, 480  $\text{cm}^{-1}$ .

6. [MEOA][ $\text{H}_2\text{PO}_4$ ]

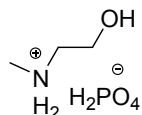

$^1\text{H}$  NMR (400 MHz,  $\text{D}_2\text{O}$ )  $\delta$  3.73 (t,  $J = 4.0$  Hz, 2H), 3.06 (t,  $J = 4.0$  Hz, 2H), 2.64 (s, 3H) ppm;  $^{13}\text{C}$  NMR (100 MHz,  $\text{D}_2\text{O}$ )  $\delta$  56.3, 50.3, 32.5 ppm.  
 IR:  $\nu$  2742, 2353, 1627, 1467, 1027, 930, 490  $\text{cm}^{-1}$ .

7. [Betaine][ $\text{H}_2\text{PO}_4$ ]

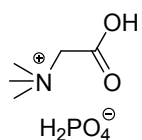

$^1\text{H}$  NMR (400 MHz,  $\text{D}_2\text{O}$ )  $\delta$  4.03 (s, 2H), 3.25 (s, 9H) ppm;  $^{13}\text{C}$  NMR (100 MHz,  $\text{D}_2\text{O}$ )  $\delta$  168.1, 64.8, 53.5 ppm.  
 IR:  $\nu$  2994, 2324, 1661, 1471, 1406, 1233, 956, 928, 894, 715, 436  $\text{cm}^{-1}$ .

8. [DEEOA][ $\text{H}_2\text{PO}_4$ ]

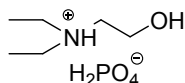

$^1\text{H}$  NMR (400 MHz,  $\text{D}_2\text{O}$ )  $\delta$  3.88 - 3.85 (m, 2H), 3.28 - 3.20 (m, 6H), 1.27 (t,  $J = 4.0$  Hz, 6H) ppm;  $^{13}\text{C}$  NMR (150 MHz,  $\text{D}_2\text{O}$ )  $\delta$  55.2, 53.1, 47.5, 7.9 ppm.  
 IR:  $\nu$  2693, 2345, 1649, 1647, 1234, 1061, 946, 878, 499  $\text{cm}^{-1}$ .

9. [DMEA][ $\text{H}_2\text{PO}_4$ ]

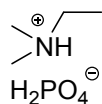

$^1\text{H}$  NMR (400 MHz,  $\text{D}_2\text{O}$ )  $\delta$  3.01 (q,  $J = 7.2$  Hz, 2H), 2.69 (s, 6H), 1.14 (t,  $J = 7.2$  Hz, 3H) ppm;  $^{13}\text{C}$  NMR (100 MHz,  $\text{D}_2\text{O}$ )  $\delta$  52.8, 41.9, 8.9 ppm.  
 IR:  $\nu$  2695, 2343, 1644, 1470, 940, 479  $\text{cm}^{-1}$ .

10. [DEOA][ $\text{H}_2\text{PO}_4$ ]

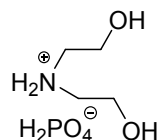

<sup>1</sup>H NMR (400 MHz, D<sub>2</sub>O) δ 3.53 - 3.33 (m, 4H), 2.89 - 2.69 (m, 4H) ppm; <sup>13</sup>C NMR (100 MHz, D<sub>2</sub>O) δ 56.2, 48.5 ppm.  
IR: ν 2810, 2382, 1618, 1438, 1253, 926, 872, 826, 683, 502 cm<sup>-1</sup>.

#### 11. [DIPEA][H<sub>2</sub>PO<sub>4</sub>]

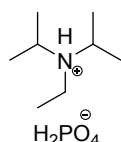

<sup>1</sup>H NMR (400 MHz, D<sub>2</sub>O) δ 3.73 (m, 2H), 3.22 (m, 2H), 1.35 (m, 15H) ppm; <sup>13</sup>C NMR (100 MHz, D<sub>2</sub>O) δ 54.3, 42.5, 17.7, 16.2, 12.1 ppm.  
IR: ν 2705, 2349, 1668, 1471, 1403, 1063, 945, 876, 503 cm<sup>-1</sup>.

#### 12. [DMEOA][H<sub>2</sub>PO<sub>4</sub>]

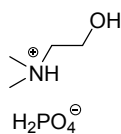

<sup>1</sup>H NMR (400 MHz, D<sub>2</sub>O) δ 3.67 - 3.65 (m, 2H), 3.06 - 3.03 (m, 2H), 2.68 (s, 6H) ppm; <sup>13</sup>C NMR (100 MHz, D<sub>2</sub>O) δ 58.5, 55.1, 42.6 ppm.  
IR: ν 2719, 2361, 1472, 1053, 933, 872, 494 cm<sup>-1</sup>.

#### 13. [Choline][H<sub>2</sub>PO<sub>4</sub>]

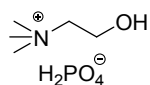

<sup>1</sup>H NMR (400 MHz, D<sub>2</sub>O) δ 4.02 - 3.96 (m, 2H), 3.47 - 3.41 (m, 2H), 3.13 (s, 9H) ppm; <sup>13</sup>C NMR (100 MHz, D<sub>2</sub>O) δ 67.3, 55.5, 53.8 ppm.  
IR: ν 3037, 2852, 2338, 1596, 1480, 1239, 1077, 936, 865, 507 cm<sup>-1</sup>.

#### 14. [Choline]<sub>2</sub>[HPO<sub>4</sub>]

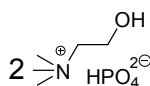

<sup>1</sup>H NMR (400 MHz, D<sub>2</sub>O) δ 3.92 - 3.88 (m, 4H), 3.39 - 3.36 (m, 4H), 3.05 (s, 18H) ppm; <sup>13</sup>C NMR (100 MHz, D<sub>2</sub>O) δ 67.3, 55.4, 53.8 ppm.

IR:  $\nu$  3030, 1655, 1479, 1373, 1033, 954, 843, 527  $\text{cm}^{-1}$ .

15. [DMEOA]<sub>2</sub>[HPO<sub>4</sub>]

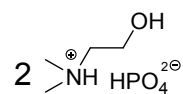

<sup>1</sup>H NMR (400 MHz, D<sub>2</sub>O)  $\delta$  3.79 - 3.77 (m, 4H), 3.18 - 3.16 (m, 4H), 2.80 (s, 12H)

ppm; <sup>13</sup>C NMR (100 MHz, D<sub>2</sub>O)  $\delta$  56.4, 52.9, 40.4 ppm.

IR:  $\nu$  2713, 2345, 1655, 1471, 1053, 934, 872, 490  $\text{cm}^{-1}$ .

16. [Choline][HSO<sub>4</sub>]

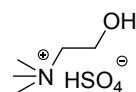

<sup>1</sup>H NMR (400 MHz, D<sub>2</sub>O)  $\delta$  4.00 - 3.96 (m, 2H), 3.45 - 3.43 (m, 2H), 3.12 (s, 9H)

ppm; <sup>13</sup>C NMR (100 MHz, D<sub>2</sub>O)  $\delta$  67.3, 55.6, 53.8 ppm.

IR:  $\nu$  3371, 2893, 1480, 1161, 1083, 1030, 952, 849, 571, 435  $\text{cm}^{-1}$ .

17. [DMEOA][HSO<sub>4</sub>]

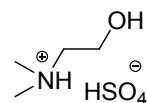

<sup>1</sup>H NMR (400 MHz, D<sub>2</sub>O)  $\delta$  3.71 - 3.68 (m, 2H), 3.10 - 3.07 (m, 2H), 2.72 (s, 6H)

ppm; <sup>13</sup>C NMR (100 MHz, D<sub>2</sub>O)  $\delta$  58.5, 55.1, 42.6 ppm.

IR:  $\nu$  3387, 3059, 1653, 1472, 1151, 1030, 987, 852, 570, 436  $\text{cm}^{-1}$ .

18. [DEOA][HSO<sub>4</sub>]

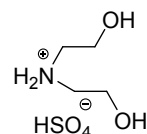

<sup>1</sup>H NMR (400 MHz, D<sub>2</sub>O)  $\delta$  3.69 - 3.64 (m, 4H), 3.04 (s, 4H) ppm; <sup>13</sup>C NMR (100

MHz, D<sub>2</sub>O)  $\delta$  60.2, 49.8 ppm.

IR:  $\nu$  3407, 3051, 2842, 1600, 1448, 1171, 1006, 939, 855, 751, 572  $\text{cm}^{-1}$ .

19. [TEOA][HSO<sub>4</sub>]

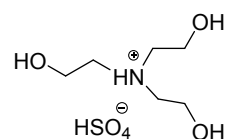

$^1\text{H}$  NMR (400 MHz,  $\text{D}_2\text{O}$ )  $\delta$  3.91 (t,  $J = 4.0$  Hz, 6H), 3.44 (t,  $J = 4.0$  Hz, 6H) ppm;

$^{13}\text{C}$  NMR (100 MHz,  $\text{D}_2\text{O}$ )  $\delta$  55.2, 54.9 ppm.

IR:  $\nu$  3387, 2899, 2162, 1707, 1162, 1091, 1025, 862, 755, 569  $\text{cm}^{-1}$ .

#### 20. [DMEA][HSO<sub>4</sub>]

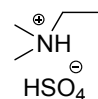

$^1\text{H}$  NMR (400 MHz,  $\text{D}_2\text{O}$ )  $\delta$  2.98 (dt,  $J = 12.3, 4.9$  Hz, 2H), 2.65 - 2.64 (m, 6H), 1.09

(td,  $J = 7.1, 2.4$  Hz, 3H) ppm;  $^{13}\text{C}$  NMR (100 MHz,  $\text{D}_2\text{O}$ )  $\delta$  52.8, 41.9, 8.9 ppm.

IR:  $\nu$  3045, 2772, 1473, 1153, 1022, 926, 846, 870, 436  $\text{cm}^{-1}$ .

#### 21. [Choline][Ac]

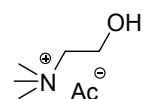

$^1\text{H}$  NMR (600 MHz,  $\text{D}_2\text{O}$ )  $\delta$  4.07 - 4.07 (m, 2H), 3.53 - 3.52 (m, 2H), 3.21 (s, 9H),

1.93 (s, 3H) ppm;  $^{13}\text{C}$  NMR (100 MHz,  $\text{D}_2\text{O}$ )  $\delta$  181.0, 67.4, 55.5, 53.8, 23.3 ppm.

IR:  $\nu$  3144, 1568, 1481, 1384, 1330, 1139, 1089, 1008, 954, 915, 867, 640, 463  $\text{cm}^{-1}$ .

#### 22. [DMEOA][Ac]

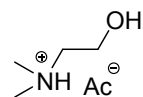

$^1\text{H}$  NMR (400 MHz,  $\text{D}_2\text{O}$ )  $\delta$  3.88 - 3.85 (m, 2H), 3.27 - 3.25 (m, 2H), 2.89 (s, 6H),

1.97 (s, 3H) ppm;  $^{13}\text{C}$  NMR (100 MHz,  $\text{D}_2\text{O}$ )  $\delta$  178.9, 58.6, 55.0, 42.6, 21.8 ppm.

IR:  $\nu$  3268, 3028, 1572, 1474, 1397, 1258, 1080, 1013, 956, 919, 858, 799, 649, 613, 452  $\text{cm}^{-1}$ .

#### 23. [DEEOA][Ac]

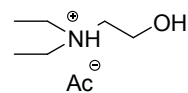

$^1\text{H}$  NMR (400 MHz,  $\text{D}_2\text{O}$ )  $\delta$  3.70 (m, 2H), 3.15 - 3.02 (m, 6H), 1.76 - 1.74 (m, 3H),

1.15 - 1.07 (m, 6H) ppm;  $^{13}\text{C}$  NMR (100 MHz,  $\text{D}_2\text{O}$ )  $\delta$  179.7, 55.1, 53.0, 47.3, 22.8, 7.9 ppm.

IR:  $\nu$  2979, 2479, 1709, 1570, 1396, 1256, 1131, 1082, 1012, 922, 877, 797, 647, 615, 552, 450  $\text{cm}^{-1}$ .

24. [MEOA][Ac]

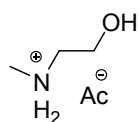

$^1\text{H}$  NMR (400 MHz,  $\text{D}_2\text{O}$ )  $\delta$  3.57 - 3.54 (m, 2H), 2.90 - 2.88 (m, 2H), 2.47 (s, 3H), 1.65 (s, 3H) ppm;  $^{13}\text{C}$  NMR (100 MHz,  $\text{D}_2\text{O}$ )  $\delta$  180.8, 56.2, 50.2, 32.4, 23.1 ppm.  
IR:  $\nu$  2731, 2441, 1556, 1392, 1334, 1149, 1082, 1039, 1012, 918, 648, 616, 533, 470  $\text{cm}^{-1}$ .

25. [TEOA][Ac]

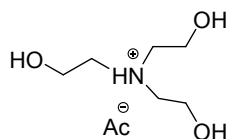

$^1\text{H}$  NMR (400 MHz,  $\text{D}_2\text{O}$ )  $\delta$  3.83 - 3.80 (m, 6H), 3.21 - 3.19 (m, 6H), 1.85 (s, 3H) ppm;  $^{13}\text{C}$  NMR (100 MHz,  $\text{D}_2\text{O}$ )  $\delta$  181.2, 56.1, 55.3, 23.3 ppm.  
IR:  $\nu$  3226, 2871, 1567, 1400, 1154, 1064, 1032, 913, 881, 648, 616  $\text{cm}^{-1}$ .

26. [Choline][BF<sub>4</sub>]

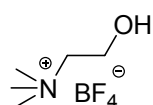

$^1\text{H}$  NMR (400 MHz,  $\text{D}_2\text{O}$ )  $\delta$  4.19 - 4.15 (m, 2H), 3.63 - 3.60 (m, 2H), 3.30 (s, 9H) ppm;  $^{13}\text{C}$  NMR (100 MHz,  $\text{D}_2\text{O}$ )  $\delta$  67.5, 55.7, 53.9 ppm.  
IR:  $\nu$  3545, 3048, 2170, 2040, 1993, 1962, 1588, 1478, 1345, 1287, 1029, 950, 869, 744, 521  $\text{cm}^{-1}$ .

27. [Choline][PF<sub>6</sub>]

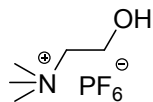

$^1\text{H}$  NMR (400 MHz,  $\text{D}_2\text{O}$ )  $\delta$  4.08 - 4.04 (m, 2H), 3.52 - 3.50 (m, 2H), 3.20 (s, 9H) ppm;  $^{13}\text{C}$  NMR (100 MHz,  $\text{D}_2\text{O}$ )  $\delta$  67.4, 55.6, 53.8 ppm.  
IR:  $\nu$  2695, 2345, 2191, 2040, 2004, 1748, 1587, 1477, 1687, 954, 816, 669, 555  $\text{cm}^{-1}$ .

28. [Choline][NTf<sub>2</sub>]

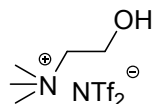

$^1\text{H}$  NMR (400 MHz, DMSO)  $\delta$  4.44 (s, 1H), 2.97 (m, 2H), 2.53 - 2.45 (m, 2H), 2.22 (s, 9H) ppm;  $^{13}\text{C}$  NMR (100 MHz, DMSO)  $\delta$  124.7, 121.5, 118.3, 115.1, 67.6, 55.6, 53.6 ppm.

IR:  $\nu$  3536, 1478, 1346, 1180, 1132, 1052, 953, 865, 790, 763, 740, 654, 613, 570, 513  $\text{cm}^{-1}$ .

29. [Choline][NO<sub>3</sub>]

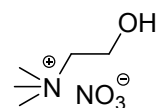

$^1\text{H}$  NMR (400 MHz, D<sub>2</sub>O)  $\delta$  4.15 - 4.11 (m, 2H), 3.60 - 3.57 (m, 2H), 3.27 (s, 9H) ppm;  $^{13}\text{C}$  NMR (100 MHz, D<sub>2</sub>O)  $\delta$  67.5, 55.7, 53.9 ppm.

IR:  $\nu$  3370, 3037, 1480, 1320, 1135, 1083, 1042, 1006, 925, 866, 830, 542, 454  $\text{cm}^{-1}$ .

30. [Choline][Cl]

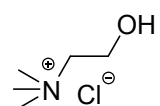

$^1\text{H}$  NMR (400 MHz, D<sub>2</sub>O)  $\delta$  4.12 - 4.08 (m, 2H), 3.58 - 3.56 (m, 2H), 3.25 (s, 9H) ppm;  $^{13}\text{C}$  NMR (100 MHz, D<sub>2</sub>O)  $\delta$  67.4, 55.7, 54.0 ppm.

IR:  $\nu$  3219, 3005, 2843, 1580, 1482, 1460, 1349, 1275, 1141, 1084, 1057, 1012, 959, 893, 865, 635, 529, 466, 449  $\text{cm}^{-1}$ .

31. [Choline][I]

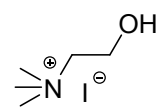

$^1\text{H}$  NMR (400 MHz, D<sub>2</sub>O)  $\delta$  4.14 - 4.10 (m, 2H), 3.60 - 3.57 (m, 2H), 3.26 (s, 9H) ppm;  $^{13}\text{C}$  NMR (100 MHz, D<sub>2</sub>O)  $\delta$  67.5, 55.7, 54.1 ppm.

IR:  $\nu$  3330, 3025, 3005, 2347, 2043, 1963, 1588, 1478, 1409, 1355, 1130, 1079, 1054, 1010, 955, 945, 895, 860, 668, 528  $\text{cm}^{-1}$ .

32. [Choline][CF<sub>3</sub>SO<sub>3</sub>]

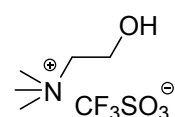

$^1\text{H}$  NMR (400 MHz, D<sub>2</sub>O)  $\delta$  4.13 - 4.10 (m, 2H), 3.58 - 3.55 (m, 2H), 3.26 (s, 9H) ppm;  
 $^{13}\text{C}$  NMR (100 MHz, D<sub>2</sub>O)  $\delta$  124.5, 121.3, 118.2, 115.0, 67.5, 55.6, 53.9 ppm.



IR:  $\nu$  3457, 1479, 1247, 1224, 1152, 1086, 1026, 953, 868, 757, 635, 572, 516  $\text{cm}^{-1}$ .

33. [Choline][CF<sub>3</sub>COO]

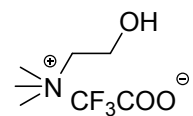

<sup>1</sup>H NMR (400 MHz, D<sub>2</sub>O)  $\delta$  4.08 - 4.04 (m, 2H), 3.53 - 3.50 (m, 2H), 3.21 (s, 9H) ppm;

<sup>13</sup>C NMR (100 MHz, D<sub>2</sub>O)  $\delta$  162.9, 162.6, 162.3, 161.9, 120.9, 118.0, 115.0, 112.1, 67.4, 55.6, 53.8 ppm.

IR:  $\nu$  3288, 1674, 1480, 1414, 1197, 1170, 1117, 1088, 1006, 953, 867, 826, 800, 718, 595, 518  $\text{cm}^{-1}$ .

1.

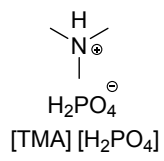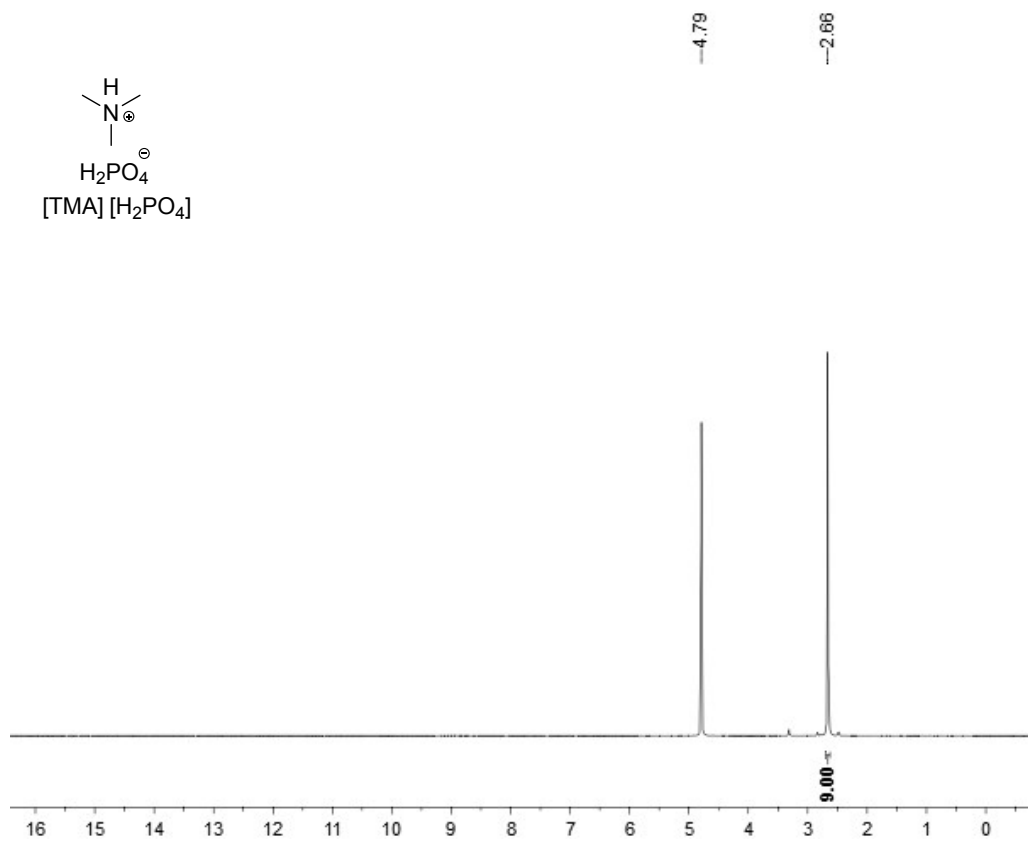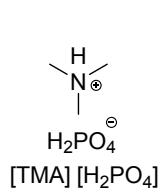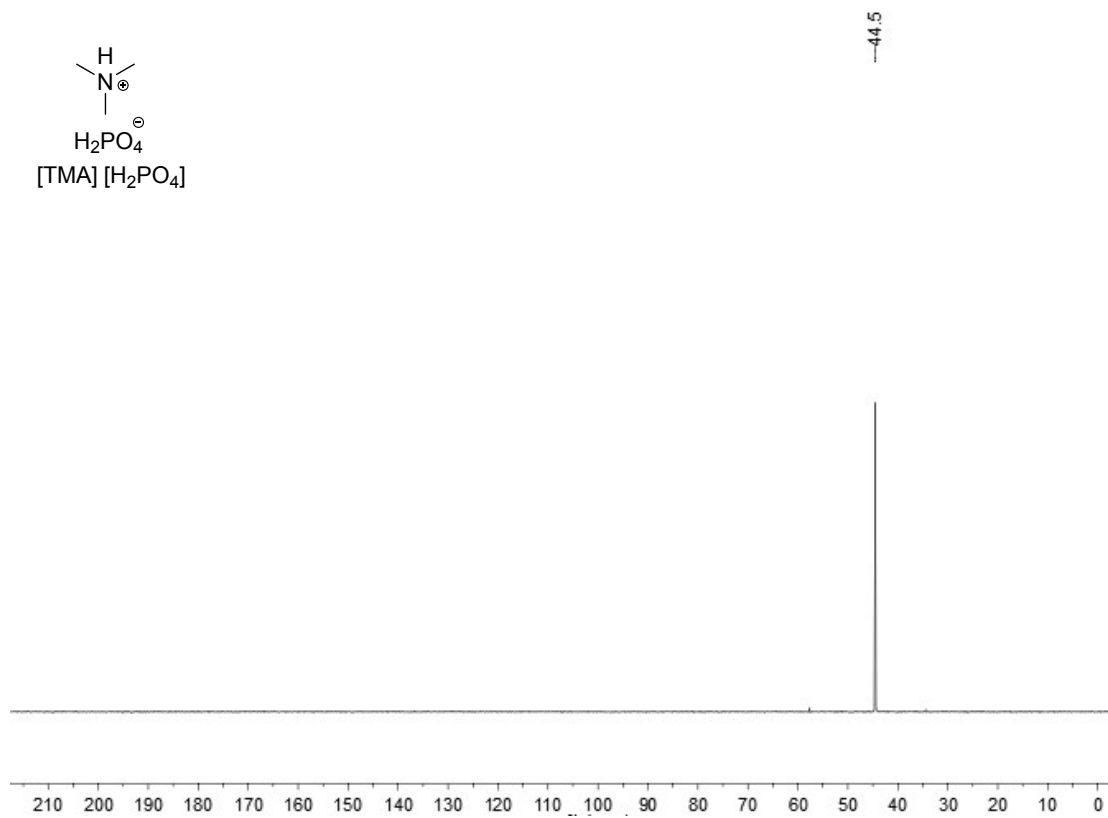

2.

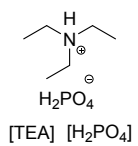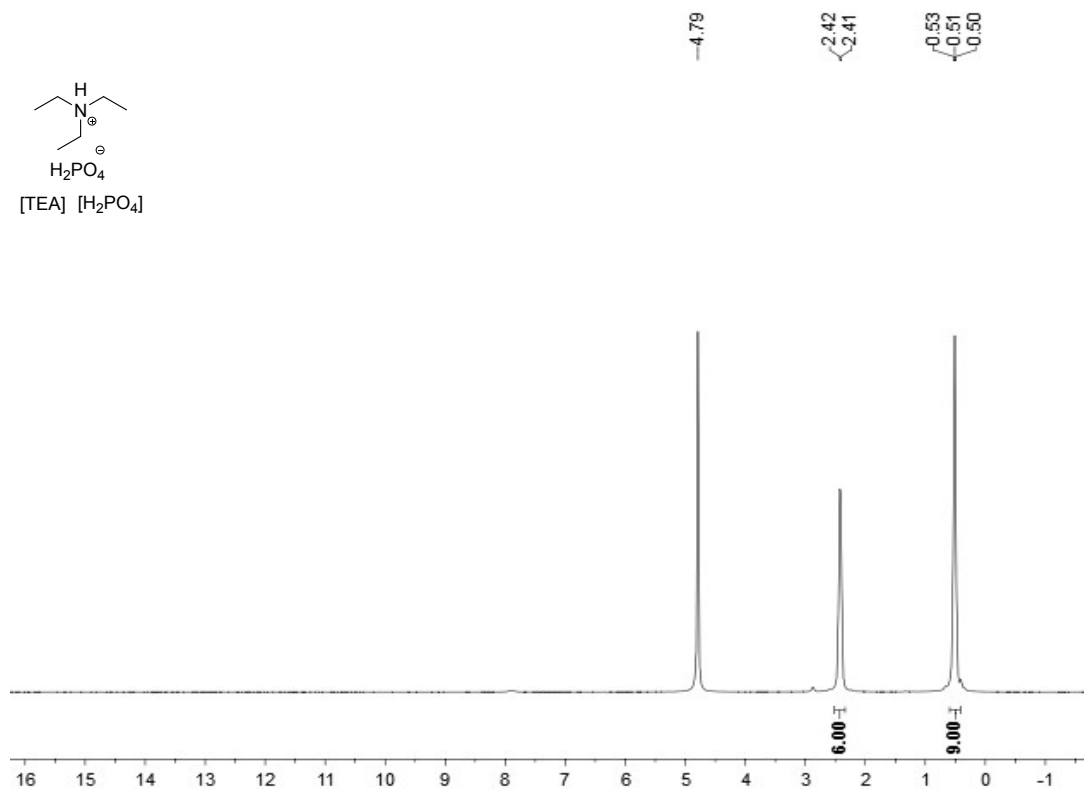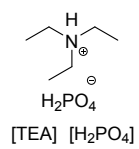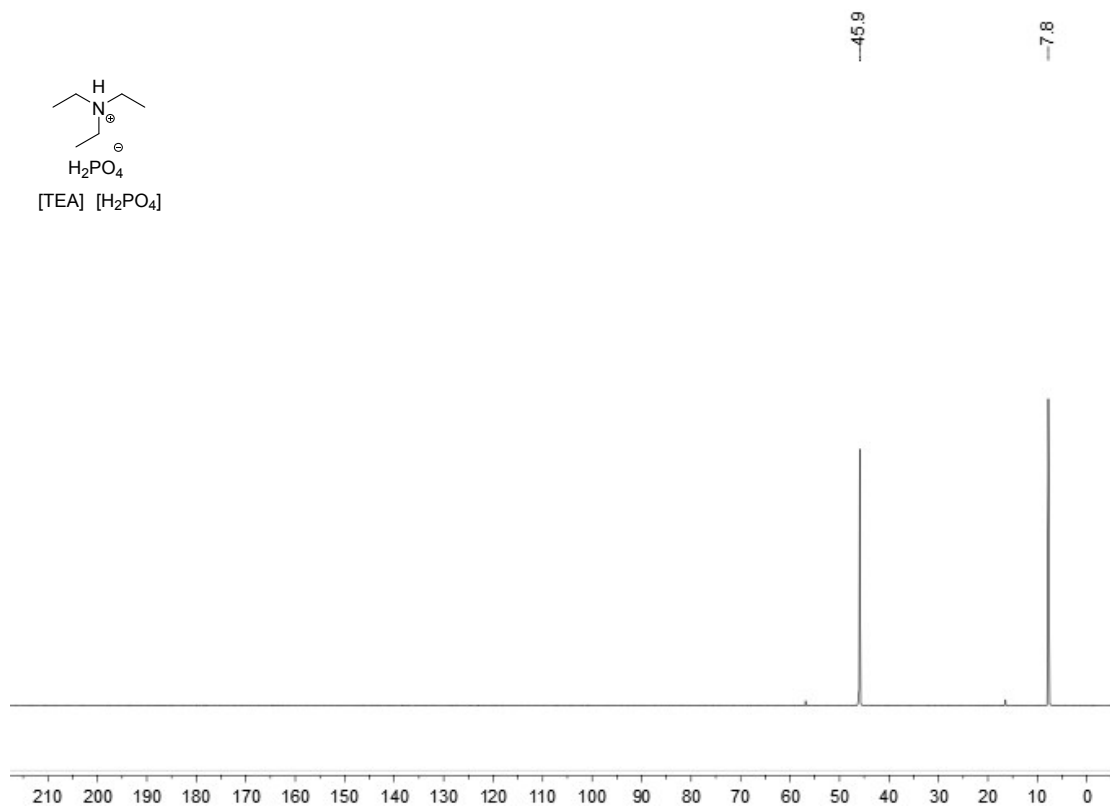

3.

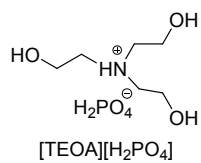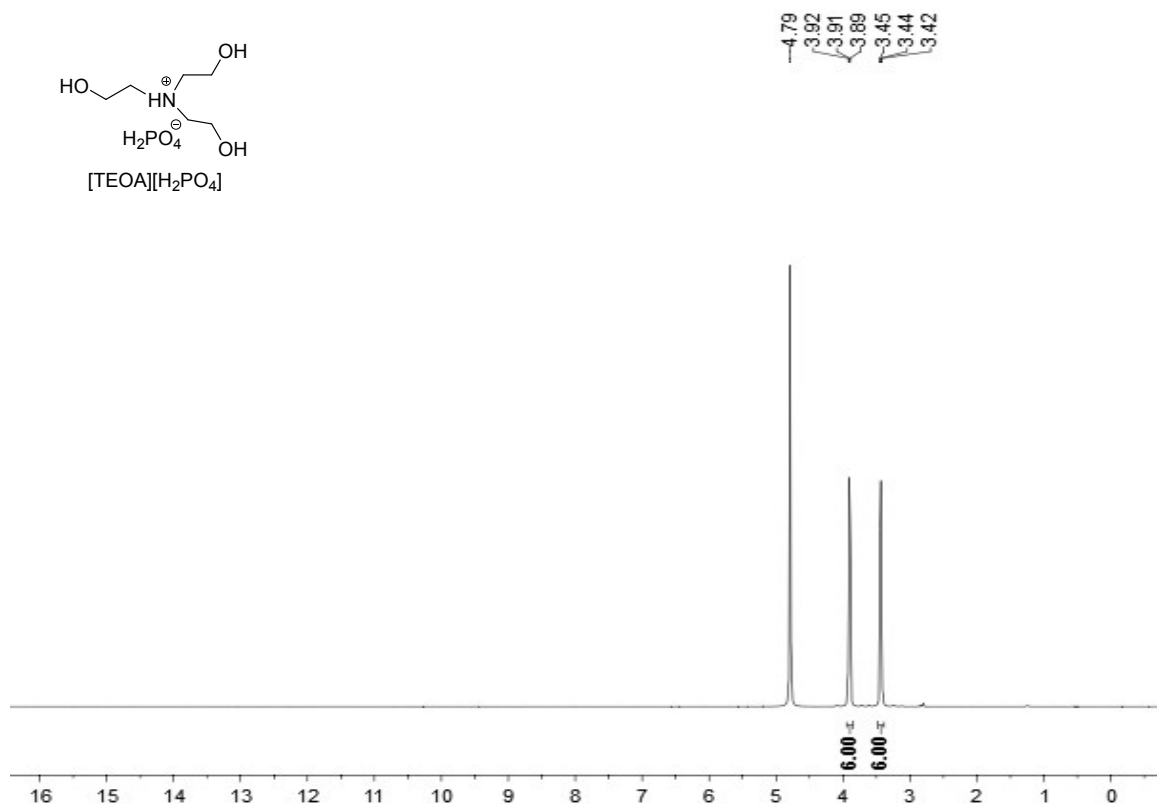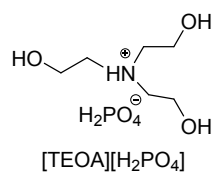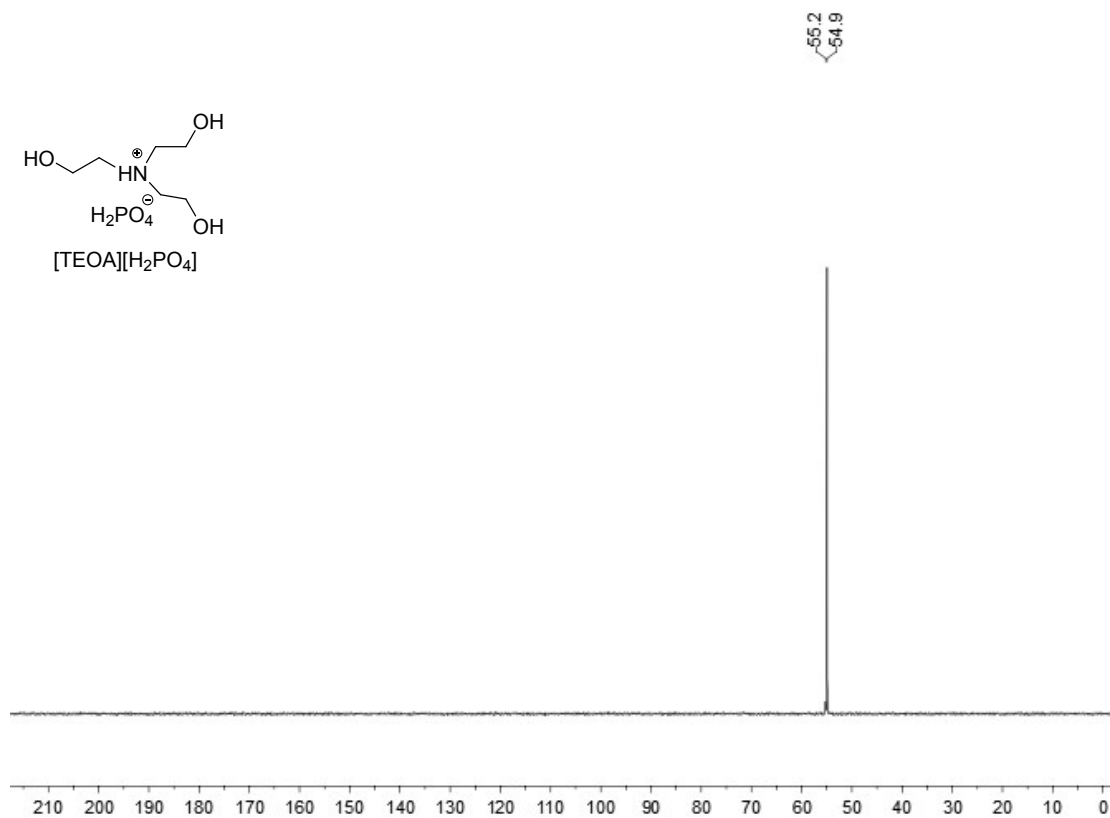

4.

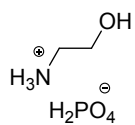

[EOA] [H<sub>2</sub>PO<sub>4</sub>]

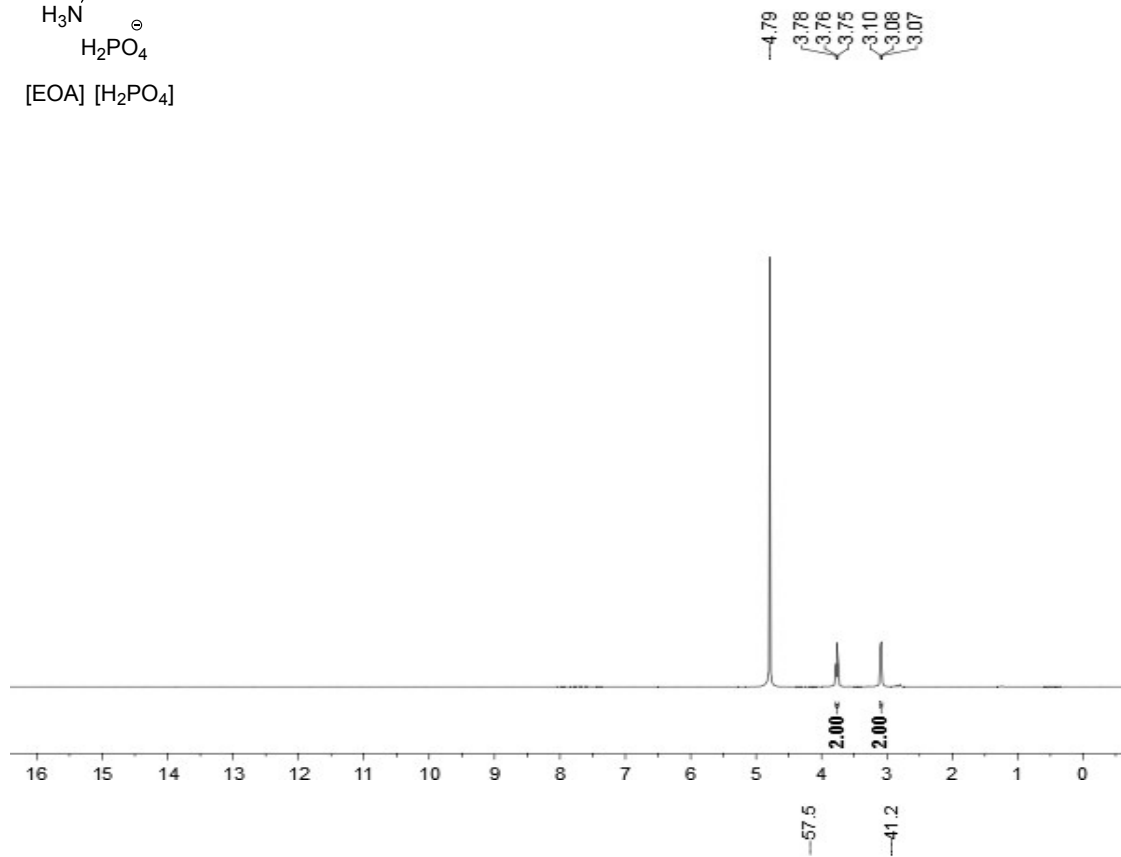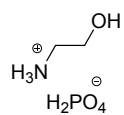

[EOA] [H<sub>2</sub>PO<sub>4</sub>]

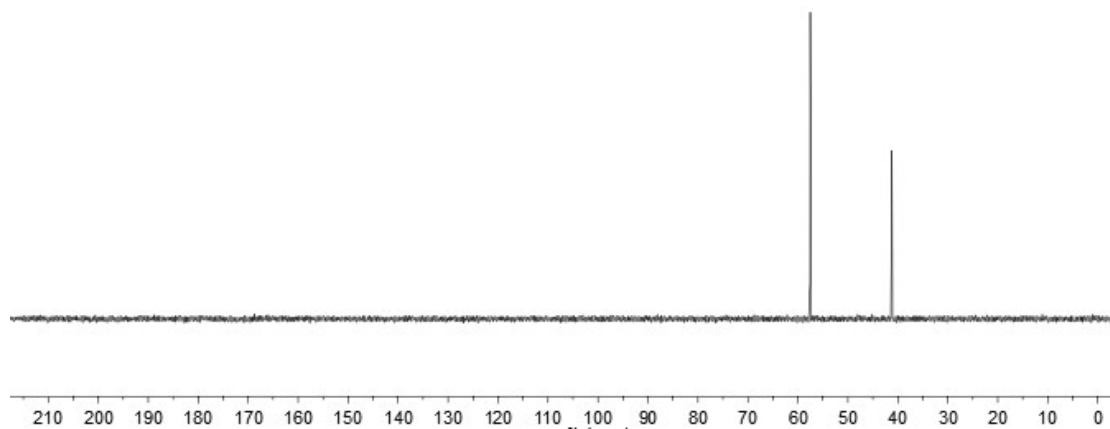

5.

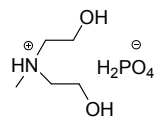

[MDEOA] [H<sub>2</sub>PO<sub>4</sub>]

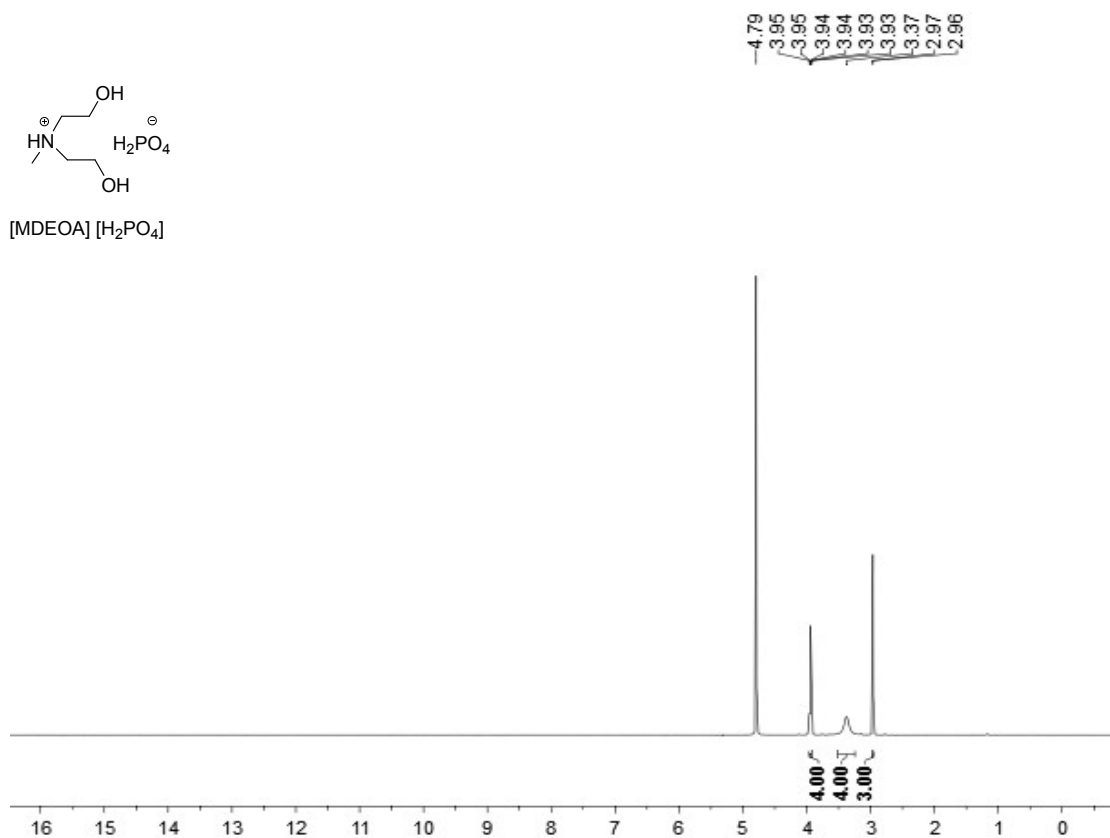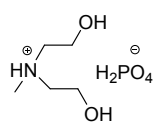

[MDEOA] [H<sub>2</sub>PO<sub>4</sub>]

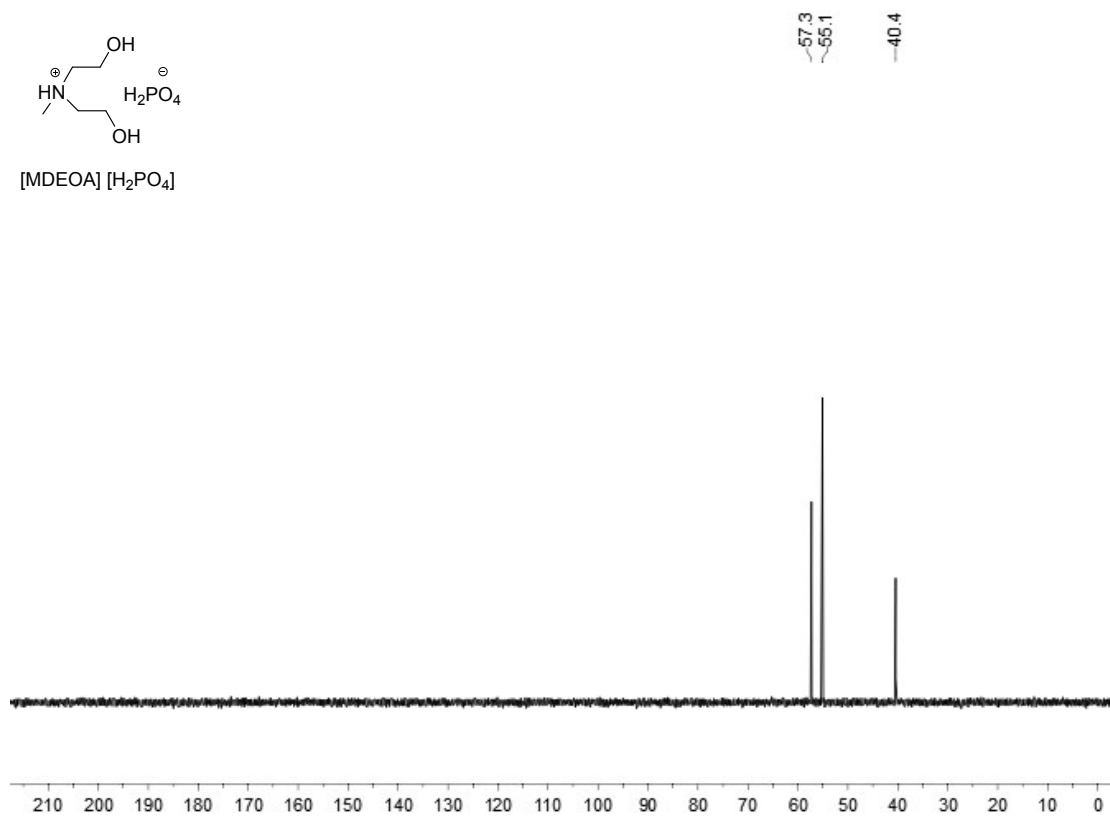

6.

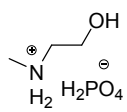

[MEOA] [H<sub>2</sub>PO<sub>4</sub>]

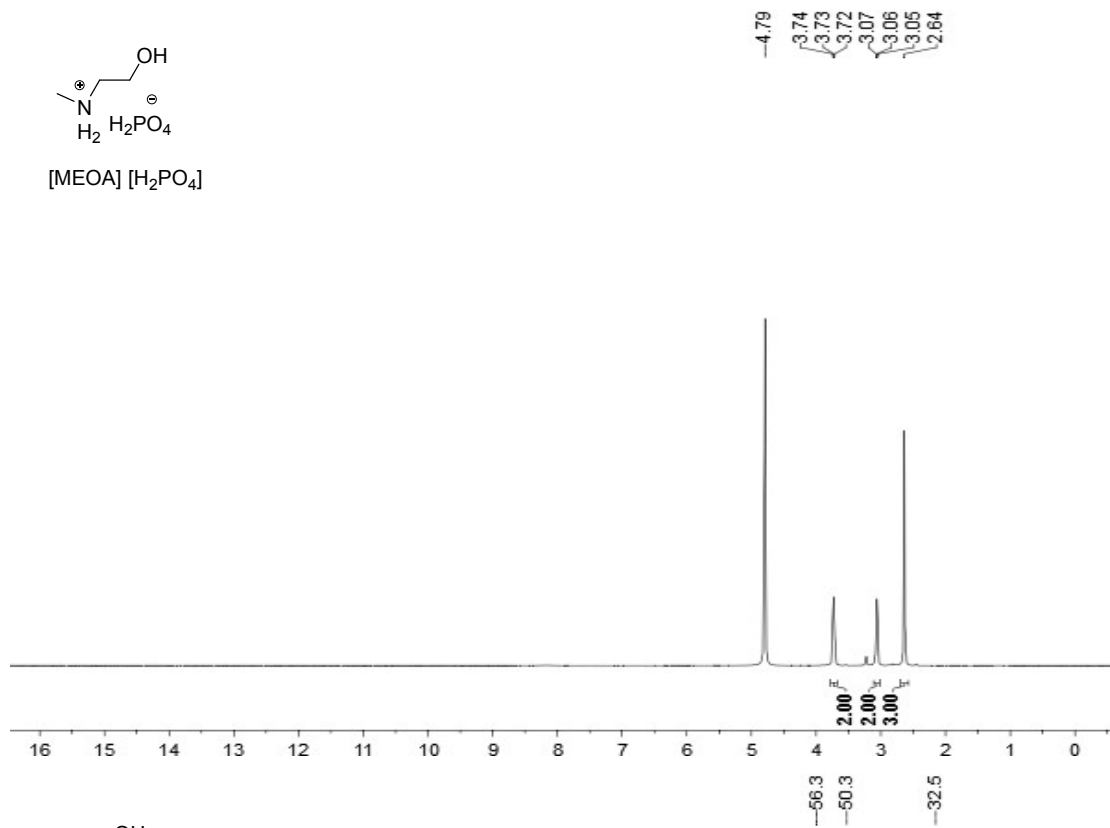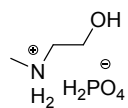

[MEOA] [H<sub>2</sub>PO<sub>4</sub>]

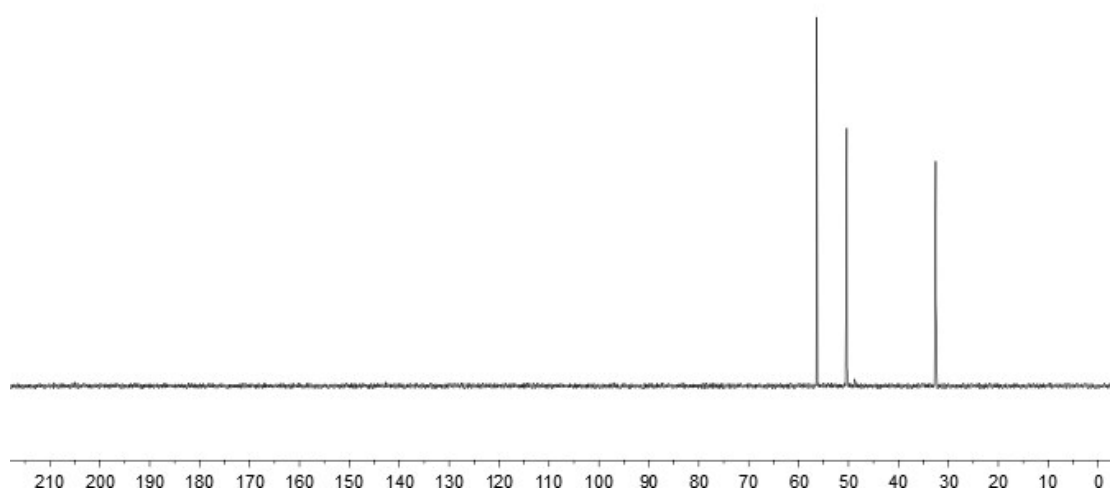

7.

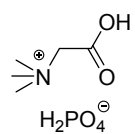

[Betaine][H<sub>2</sub>PO<sub>4</sub>]

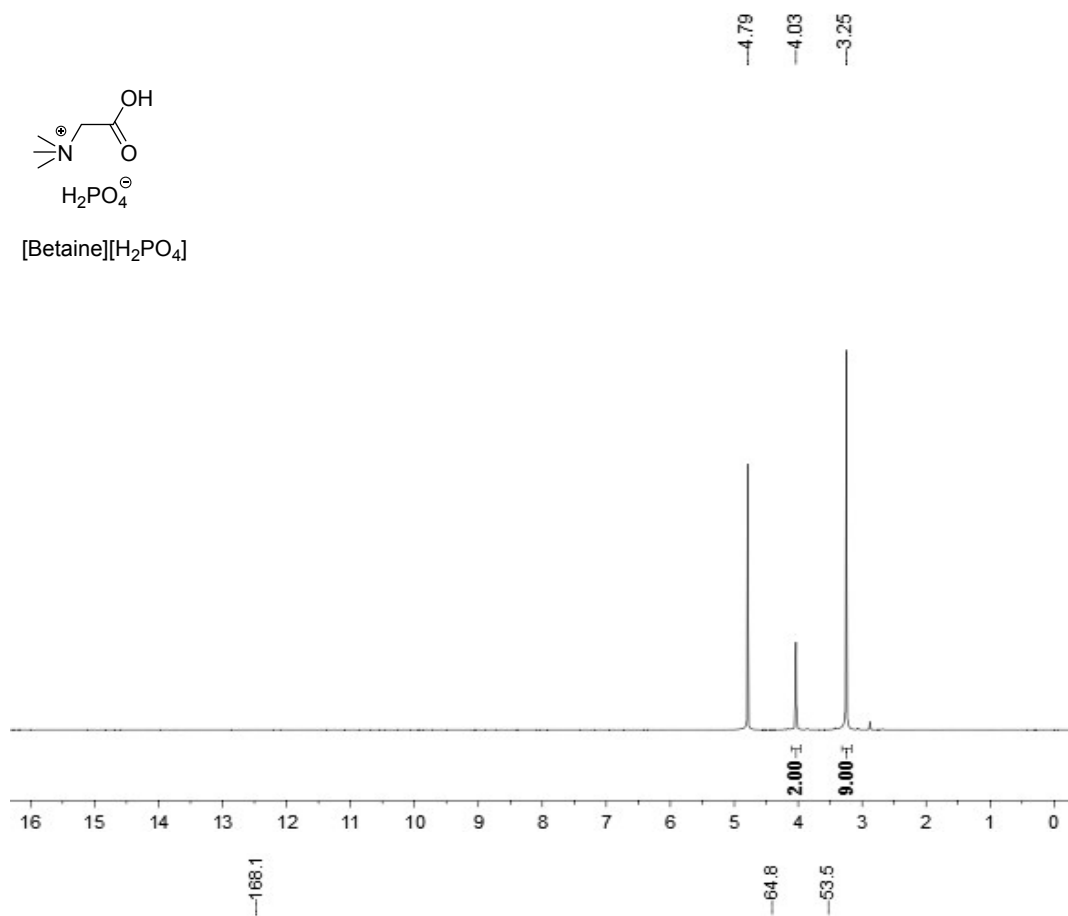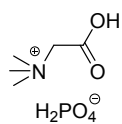

[Betaine][H<sub>2</sub>PO<sub>4</sub>]

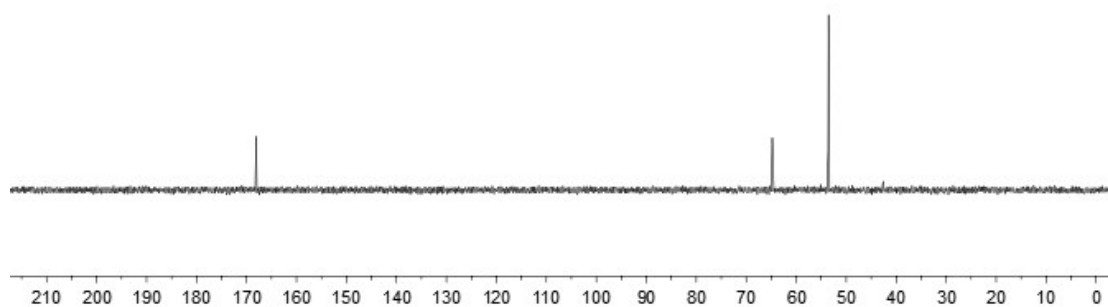



8.

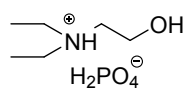

[DEEOA][H<sub>2</sub>PO<sub>4</sub>]

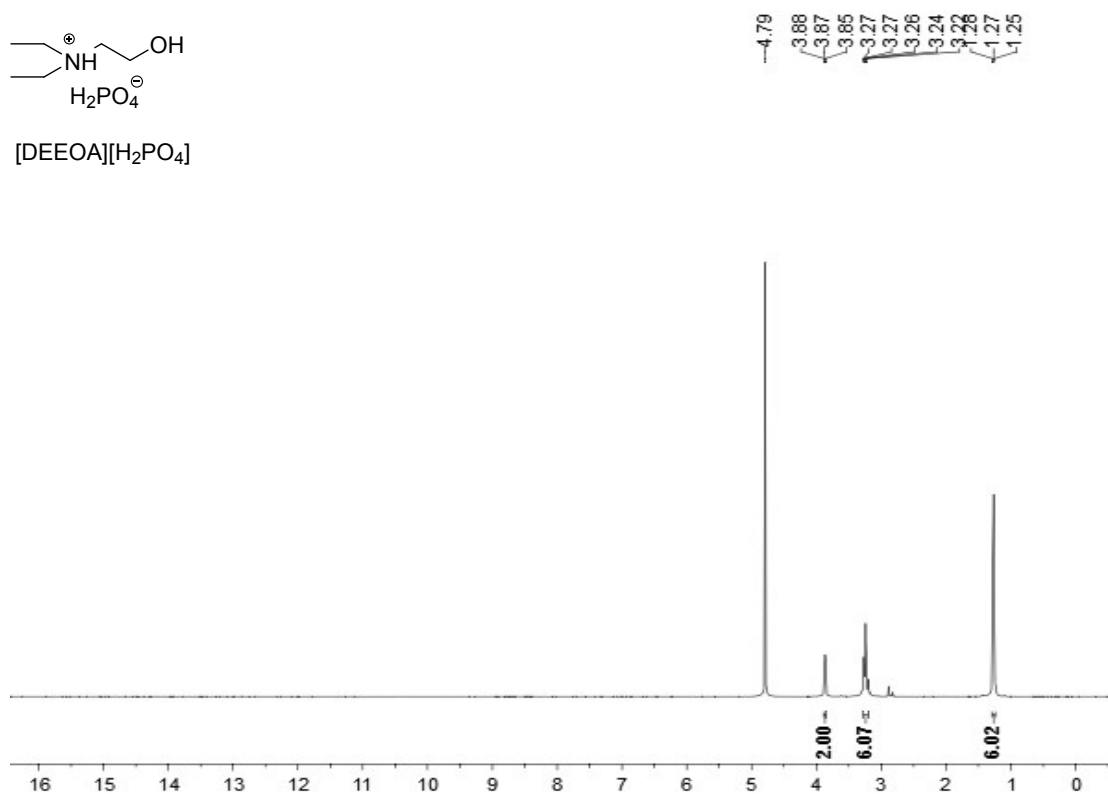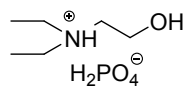

[DEEOA][H<sub>2</sub>PO<sub>4</sub>]

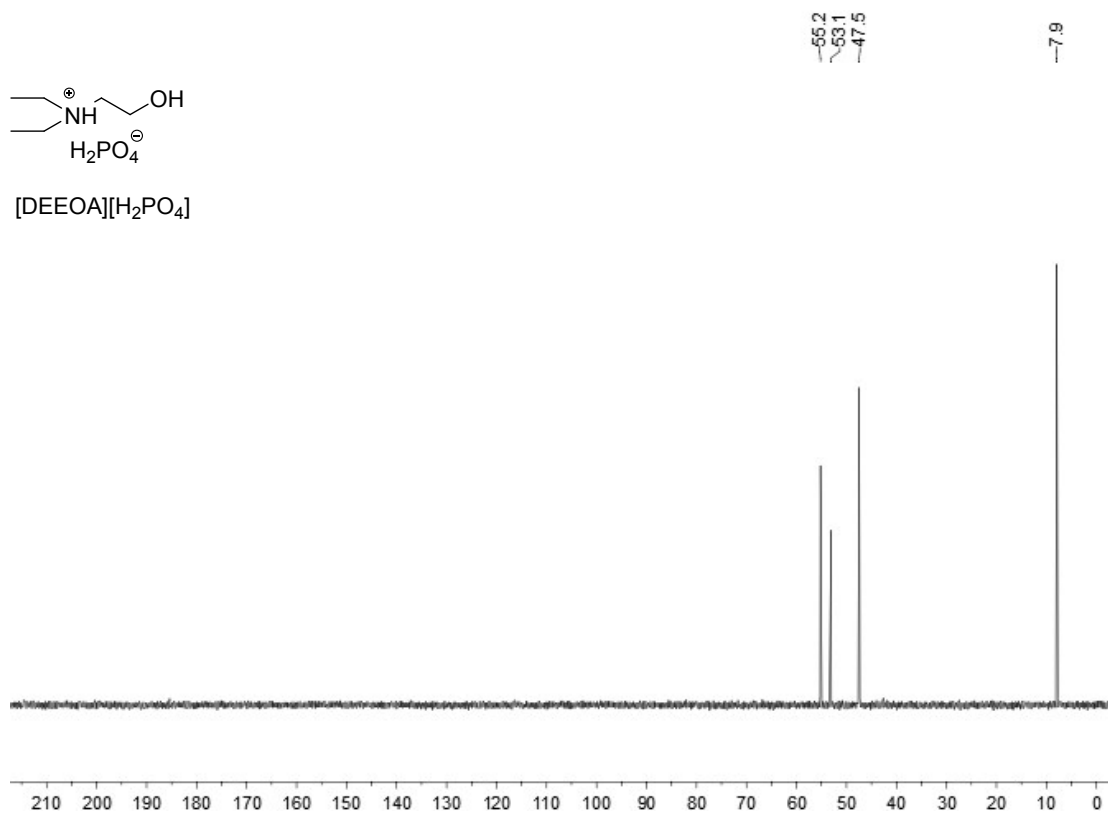

9.

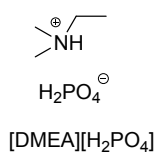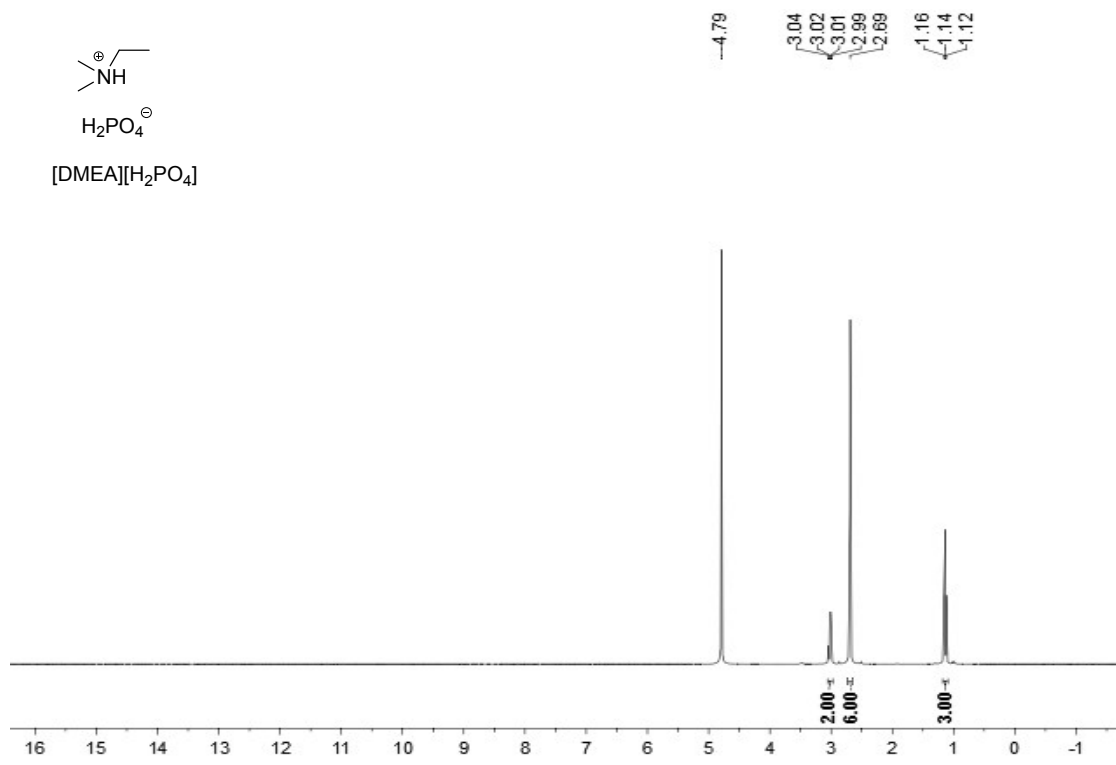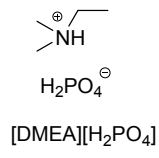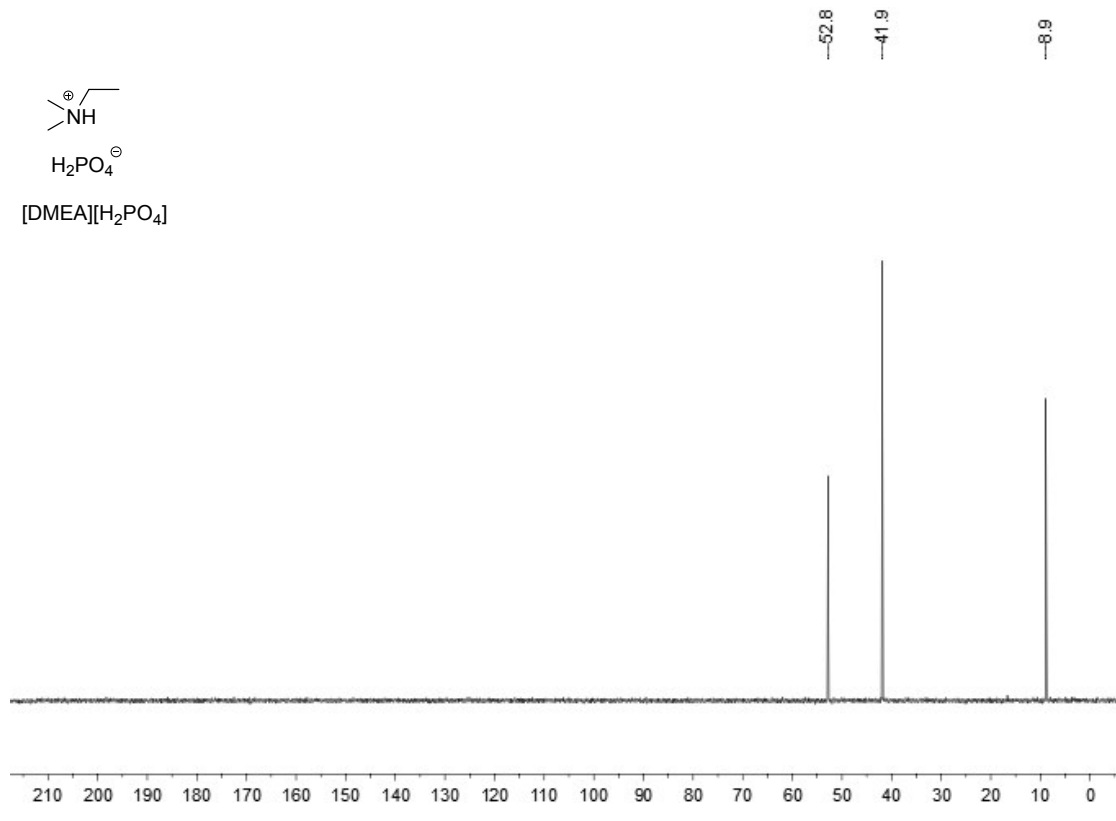

10.

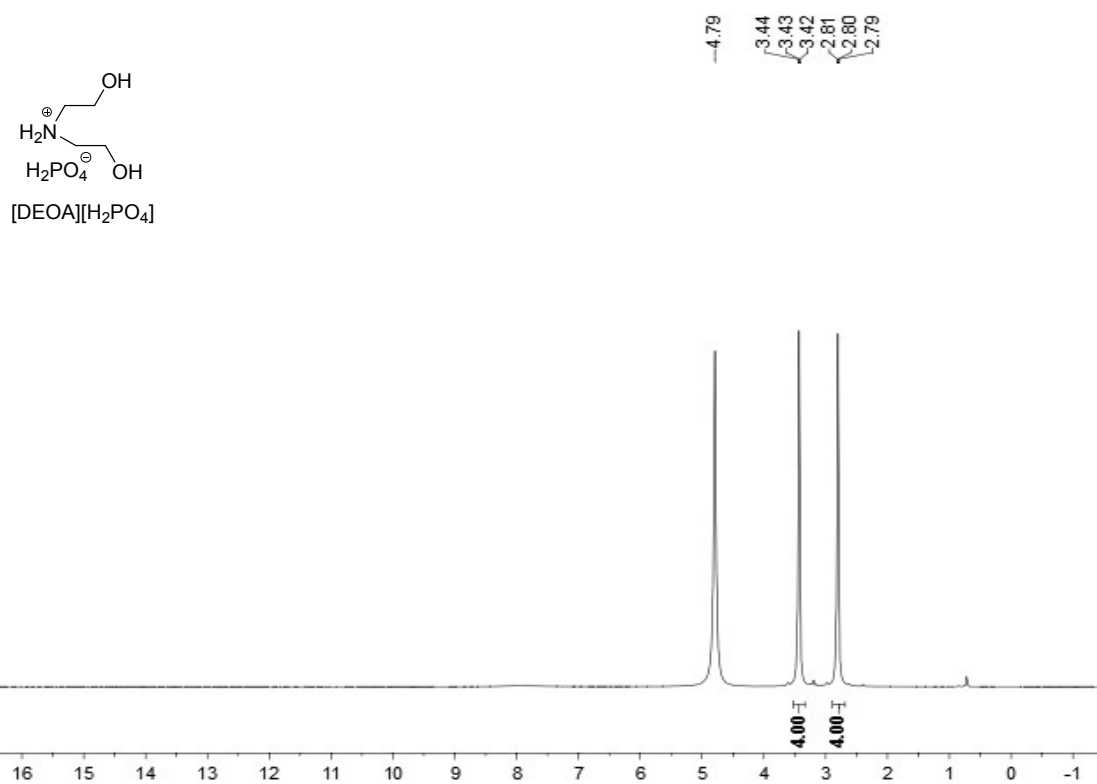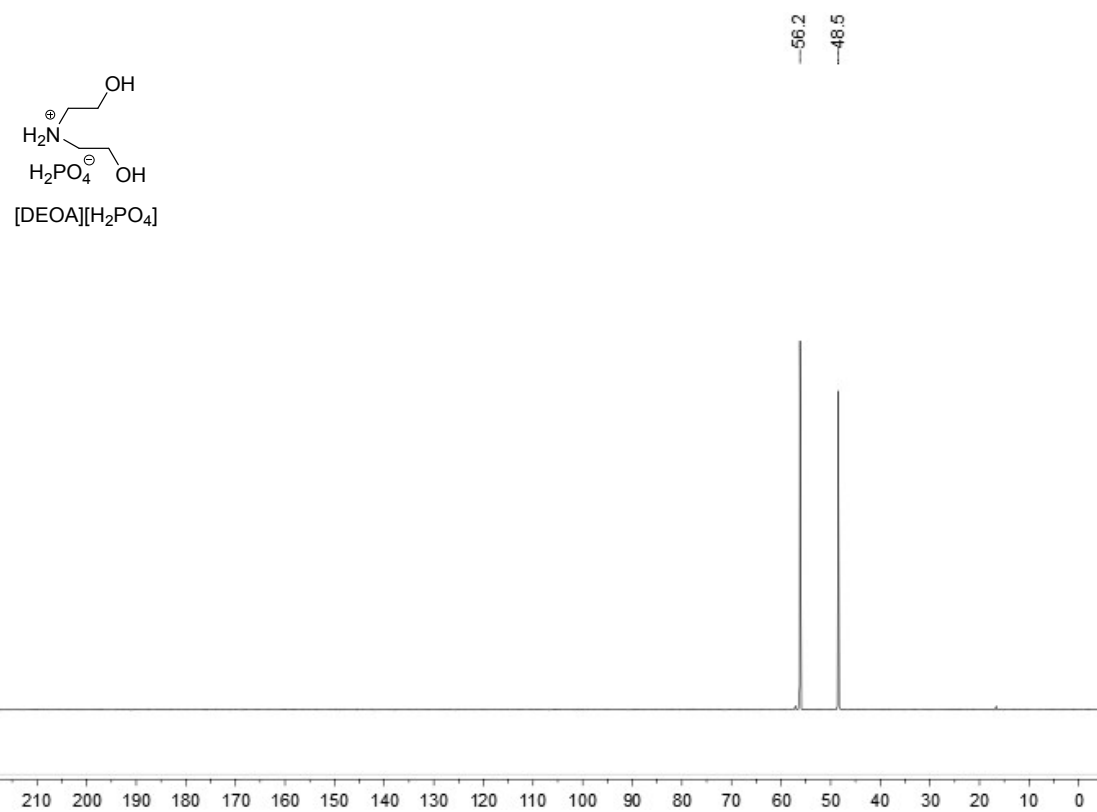

11.

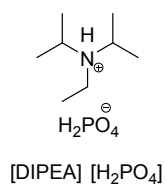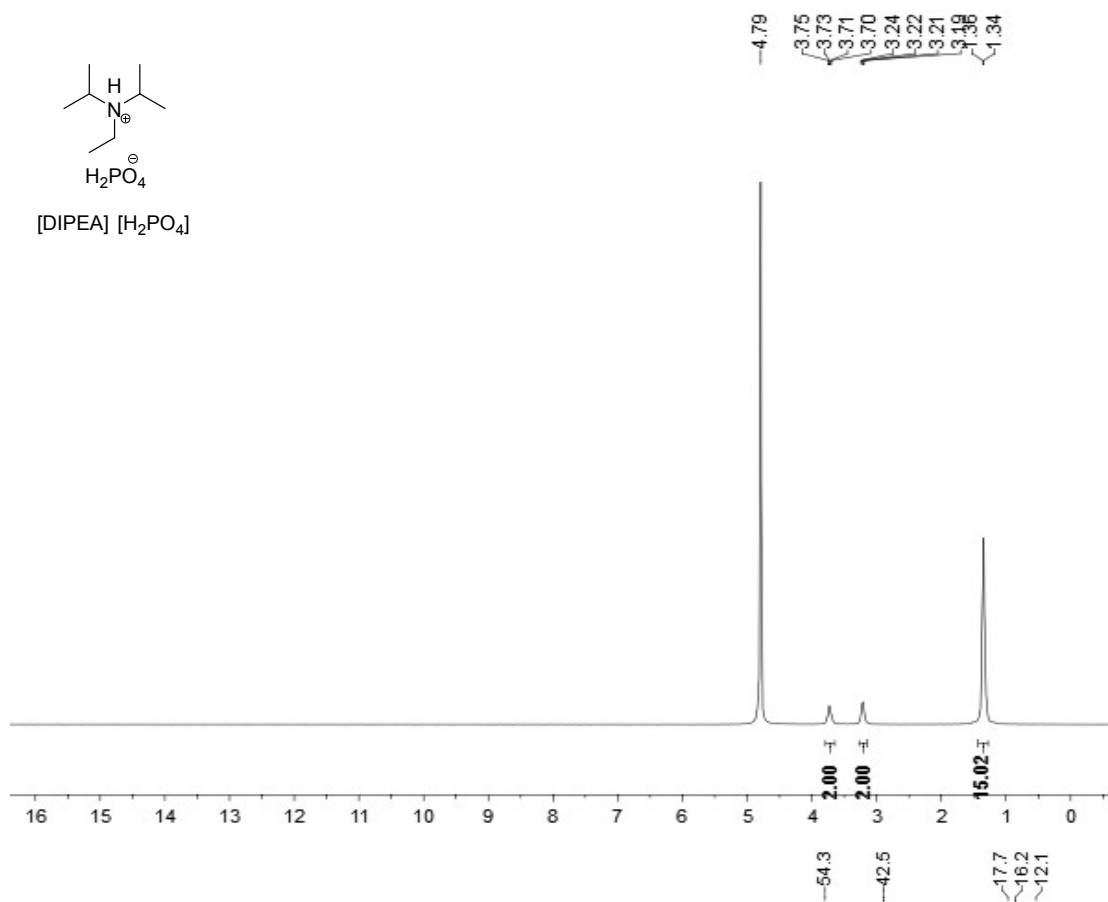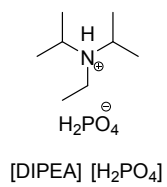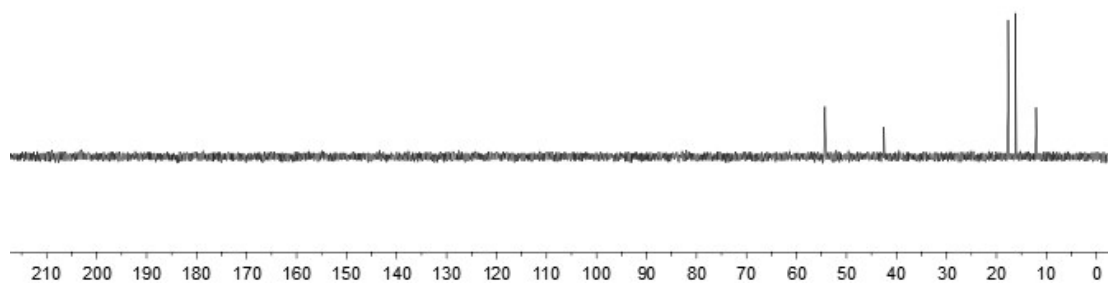

12.

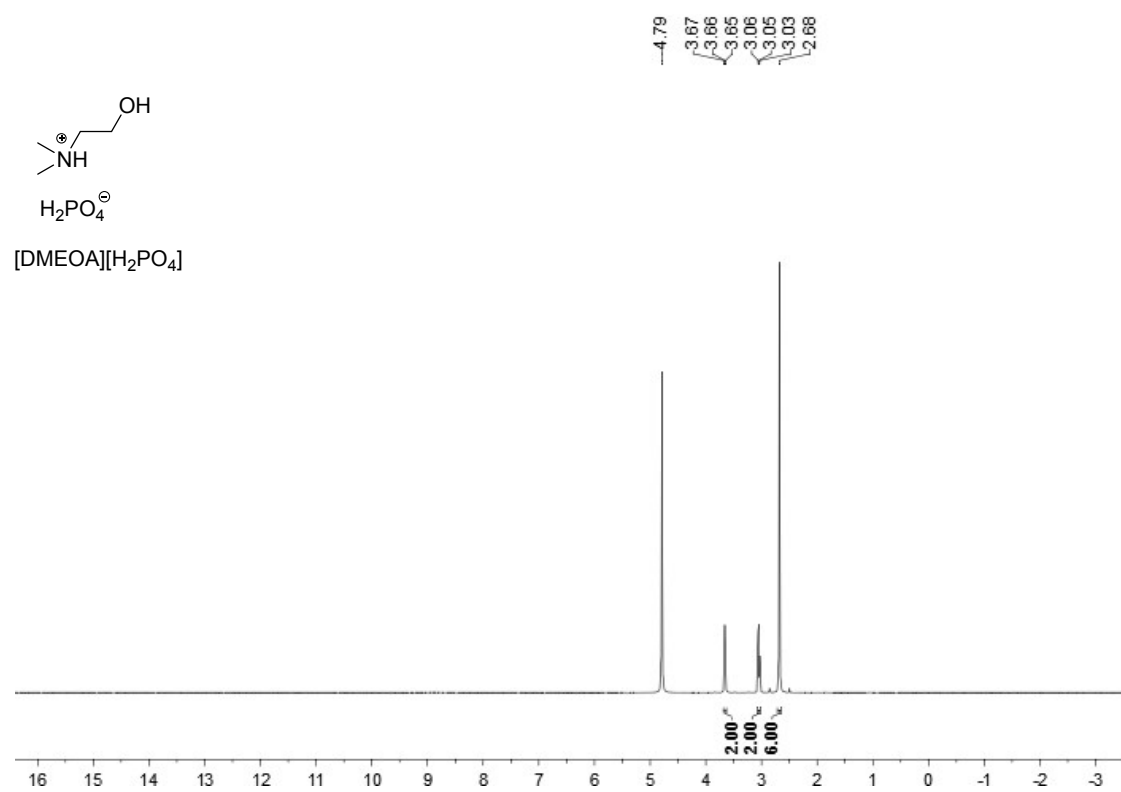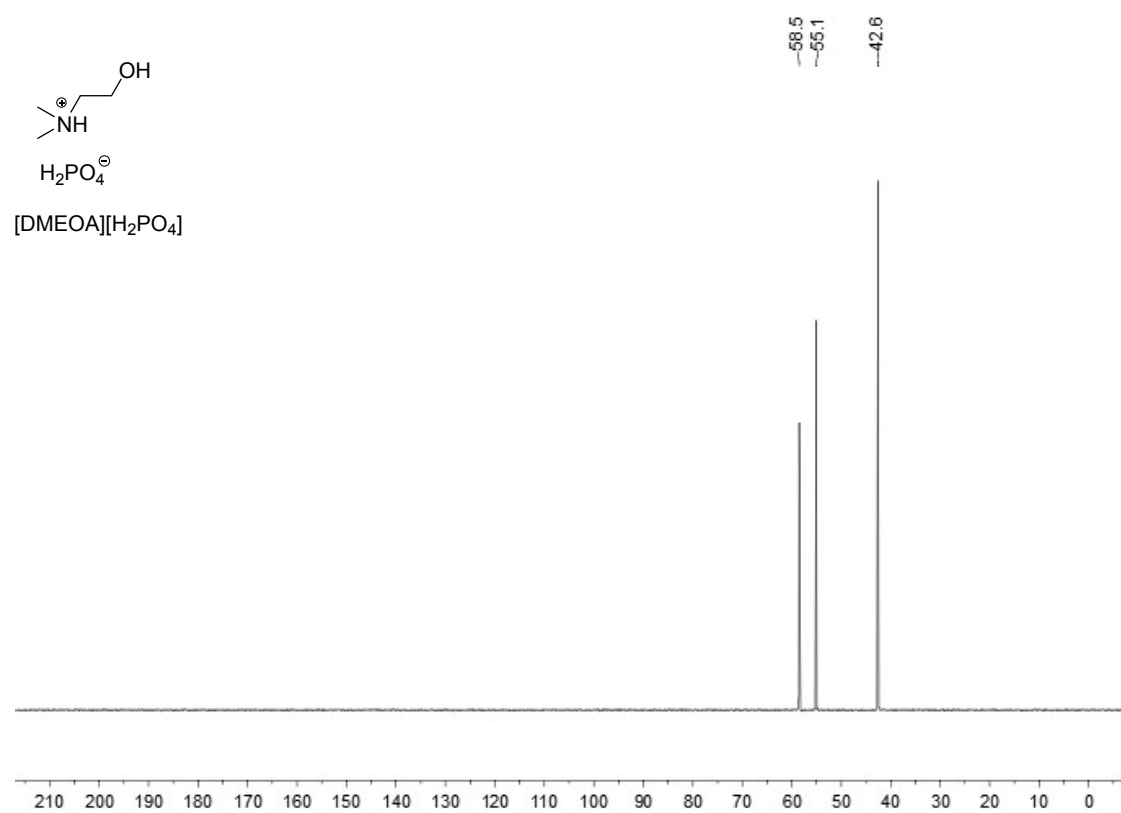

13.

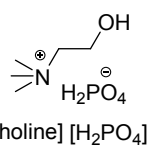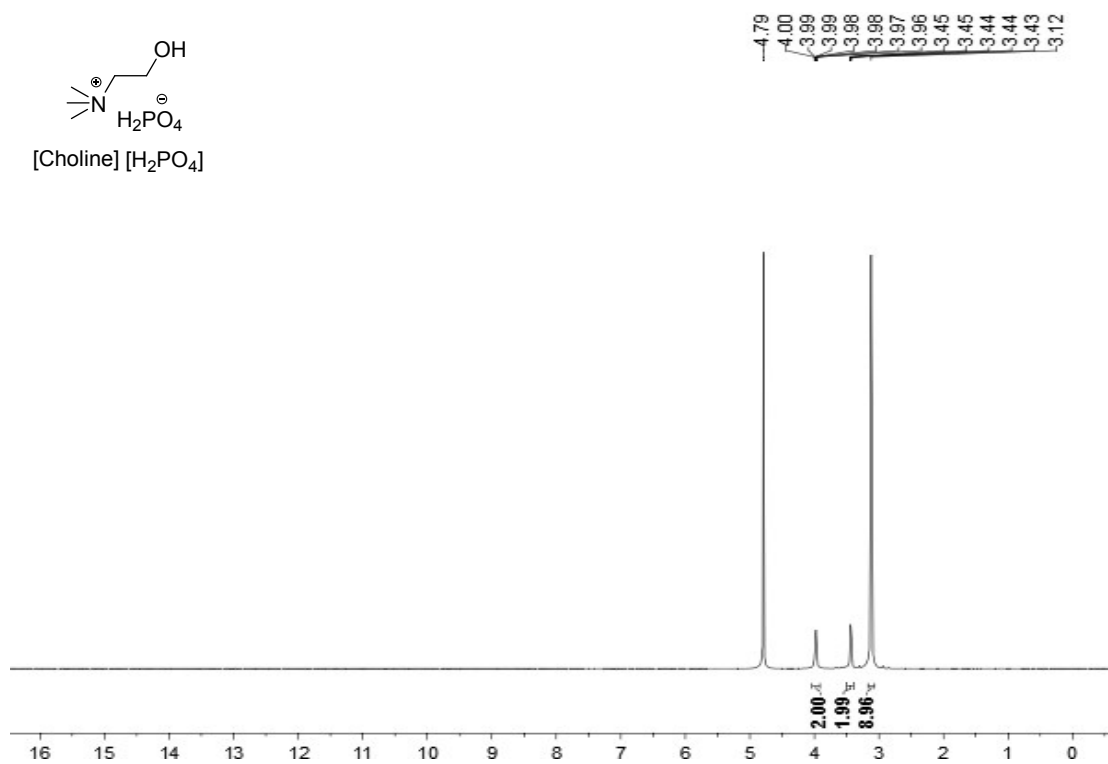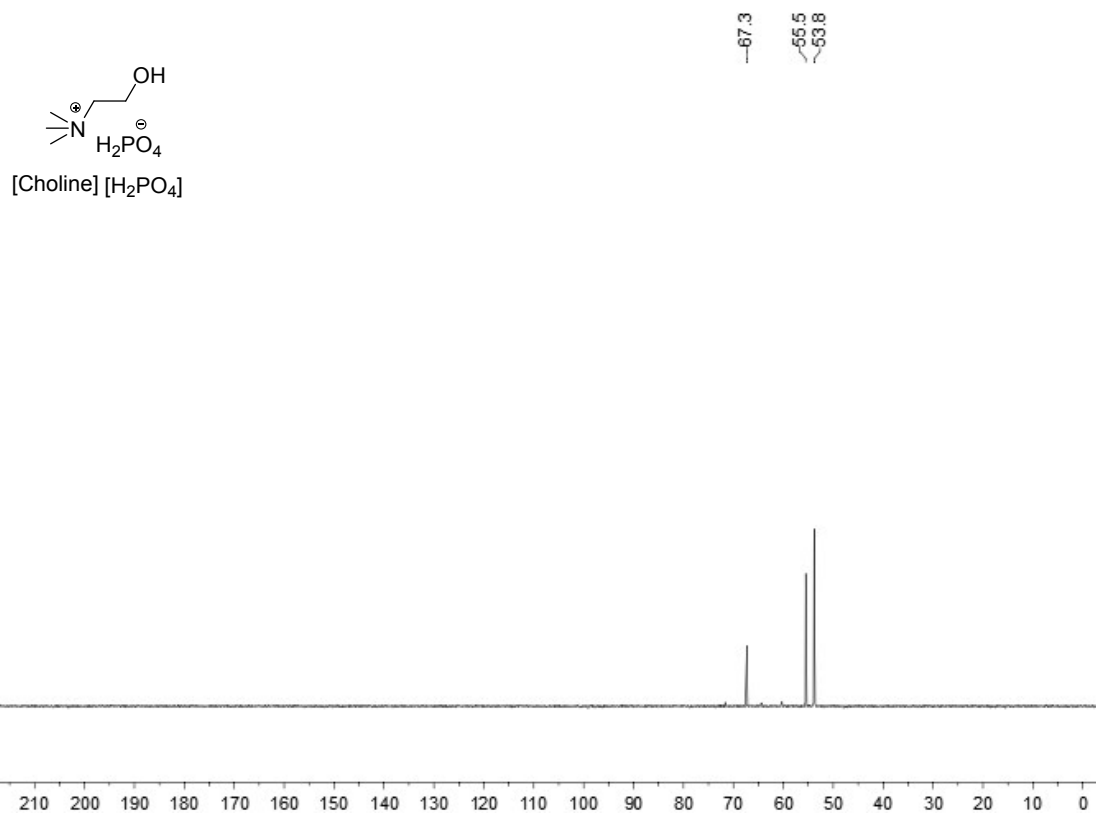

14.

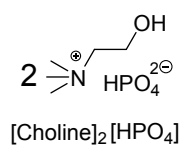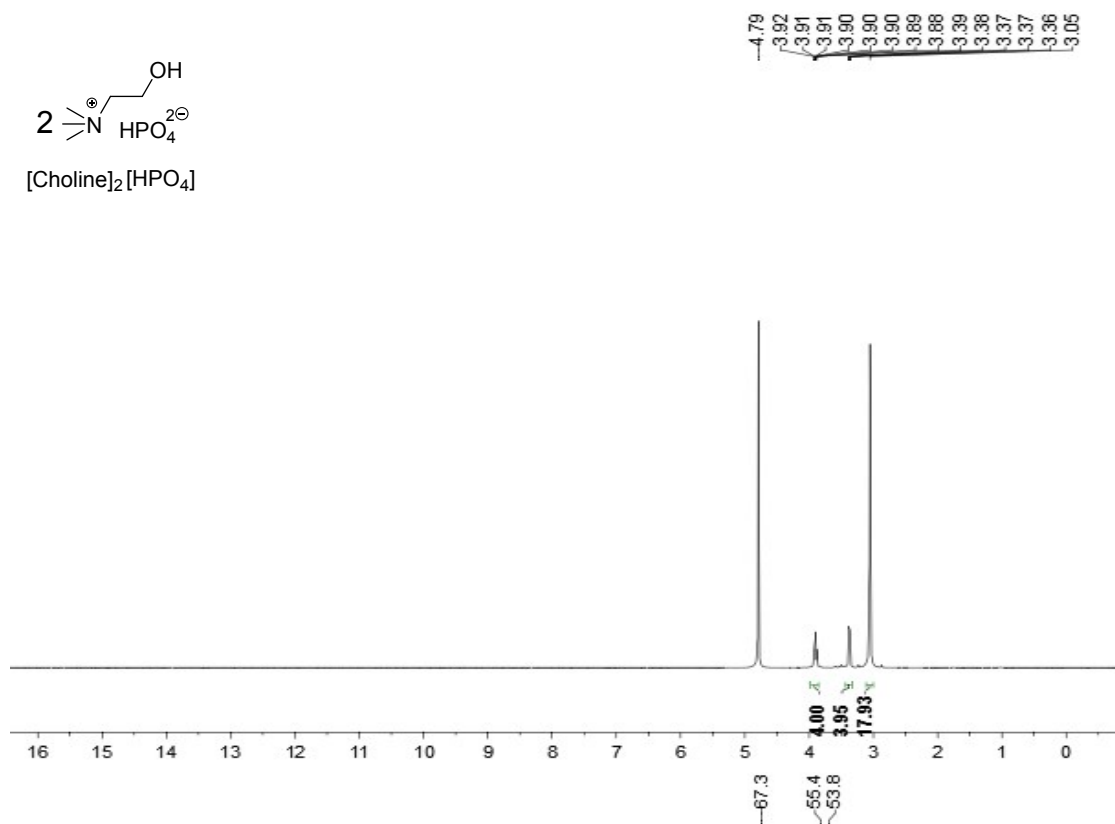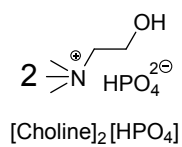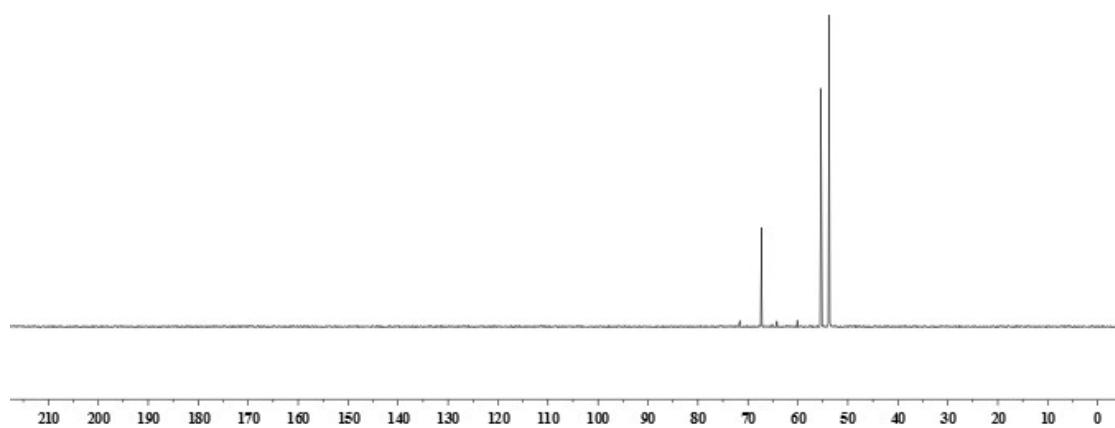

15.

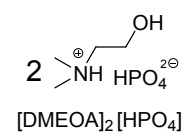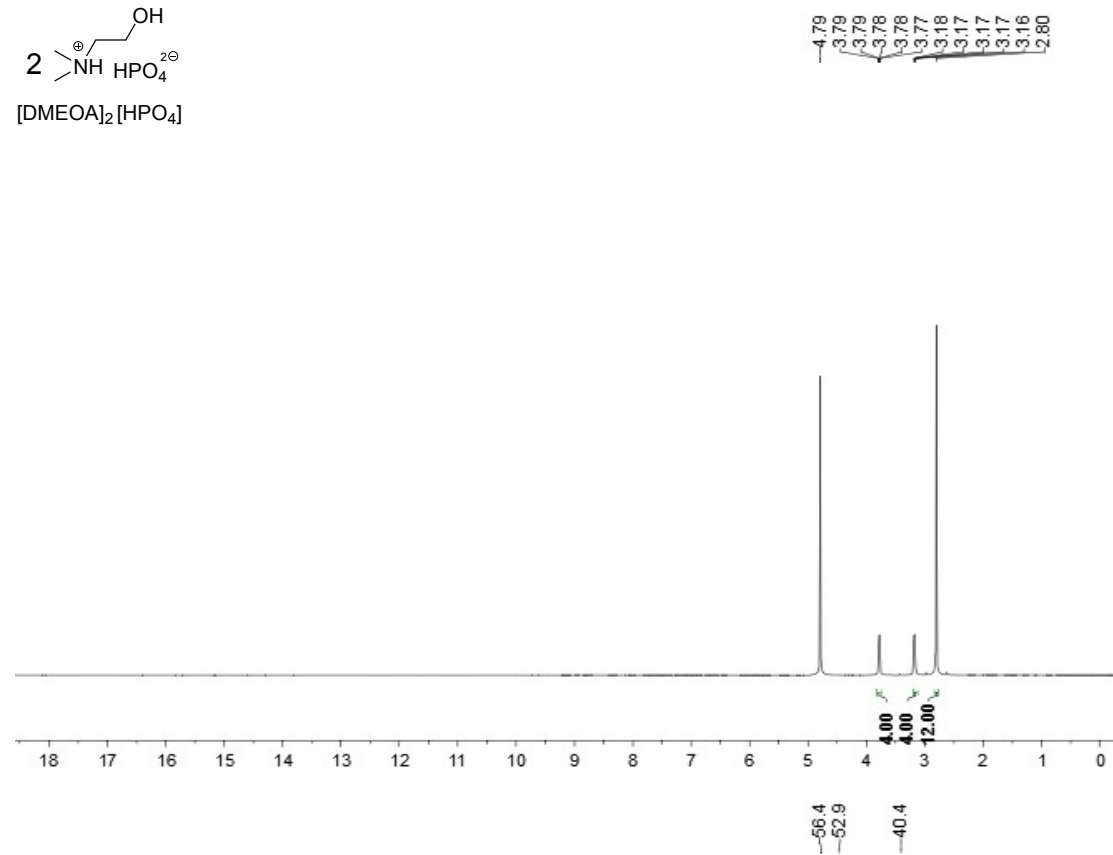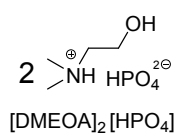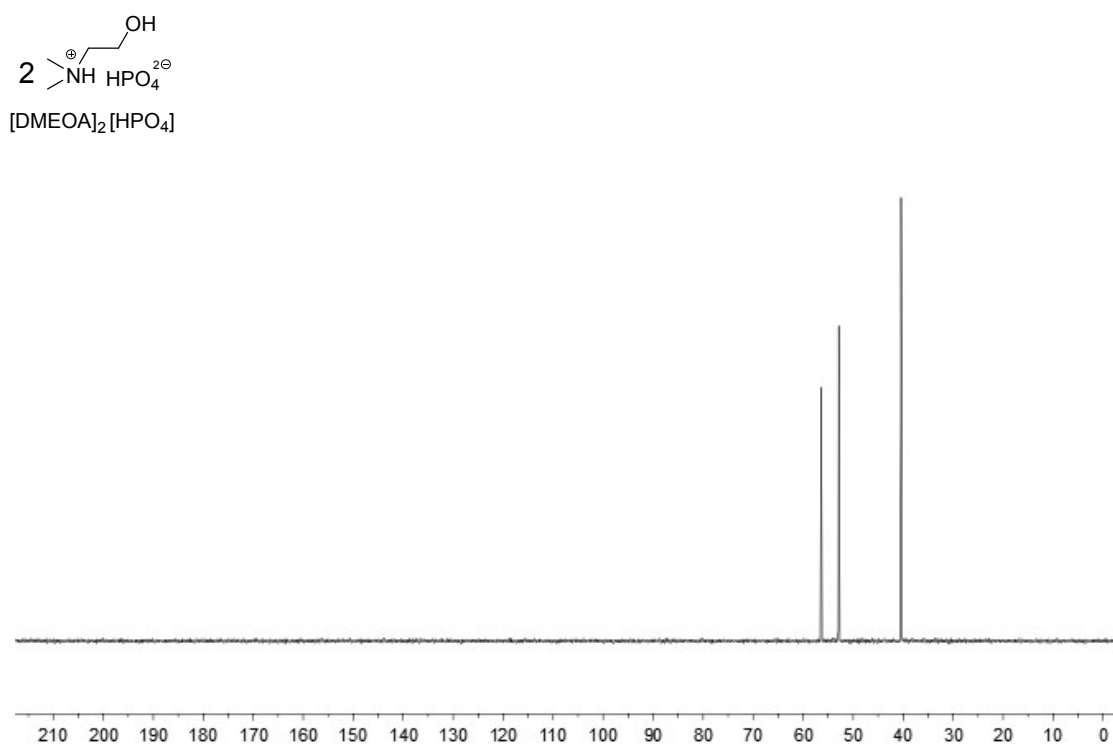



16.

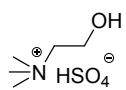

[Choline] [HSO<sub>4</sub>]

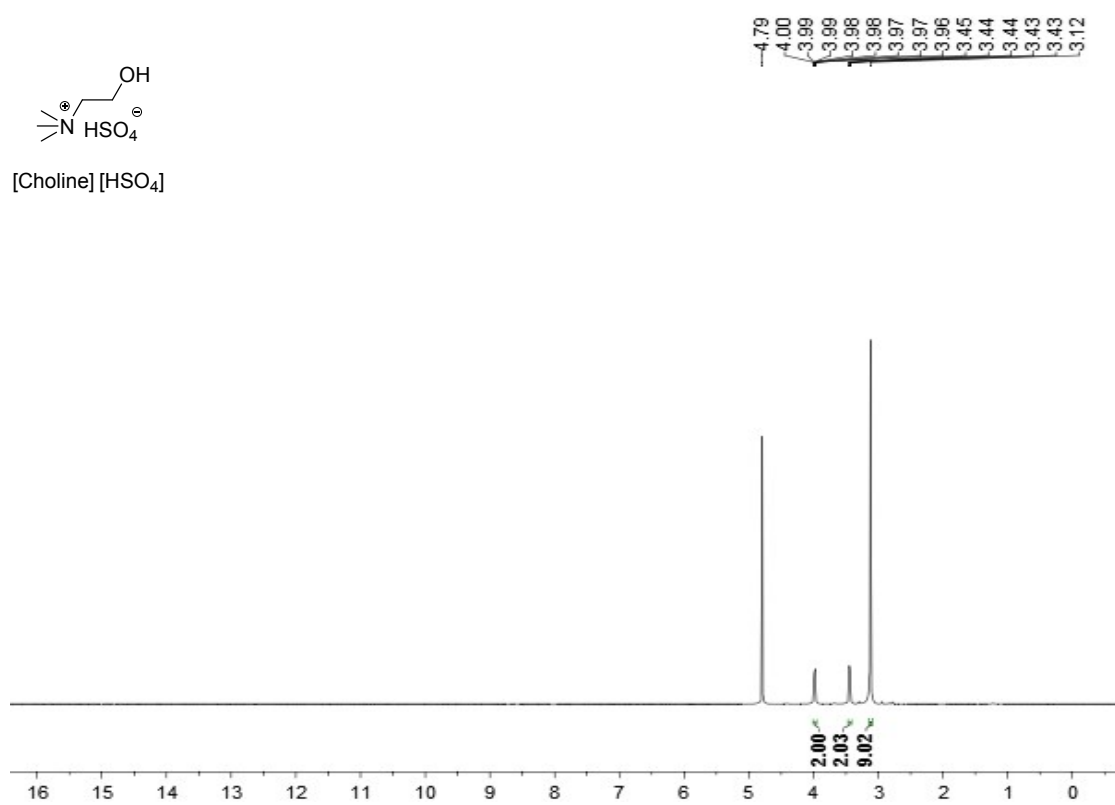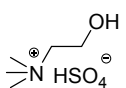

[Choline] [HSO<sub>4</sub>]

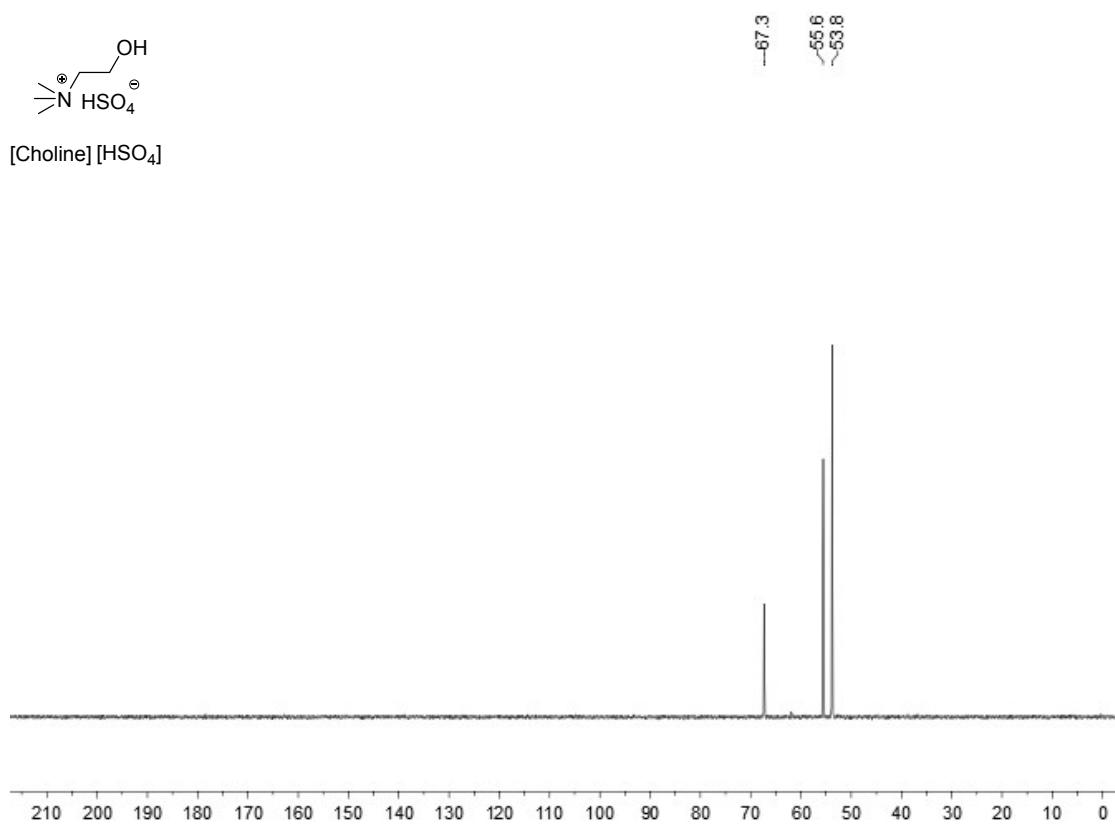

17.

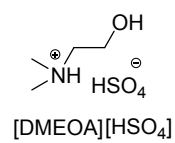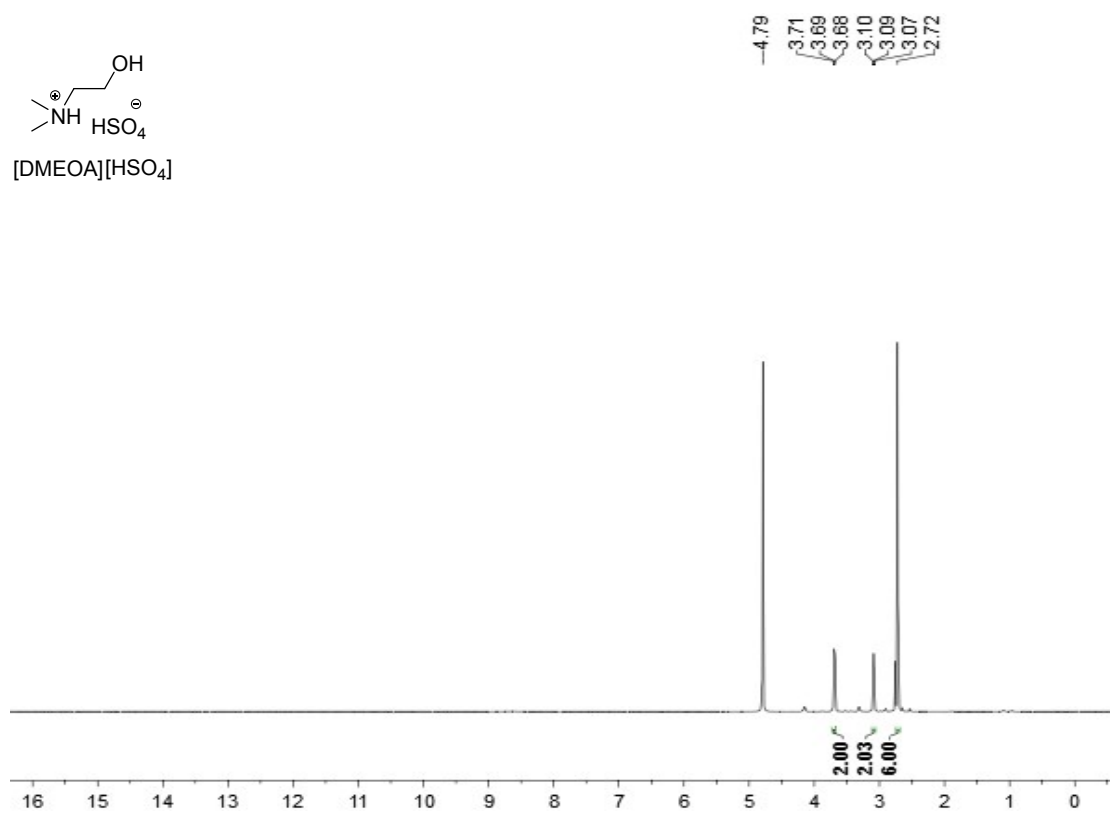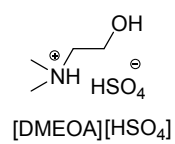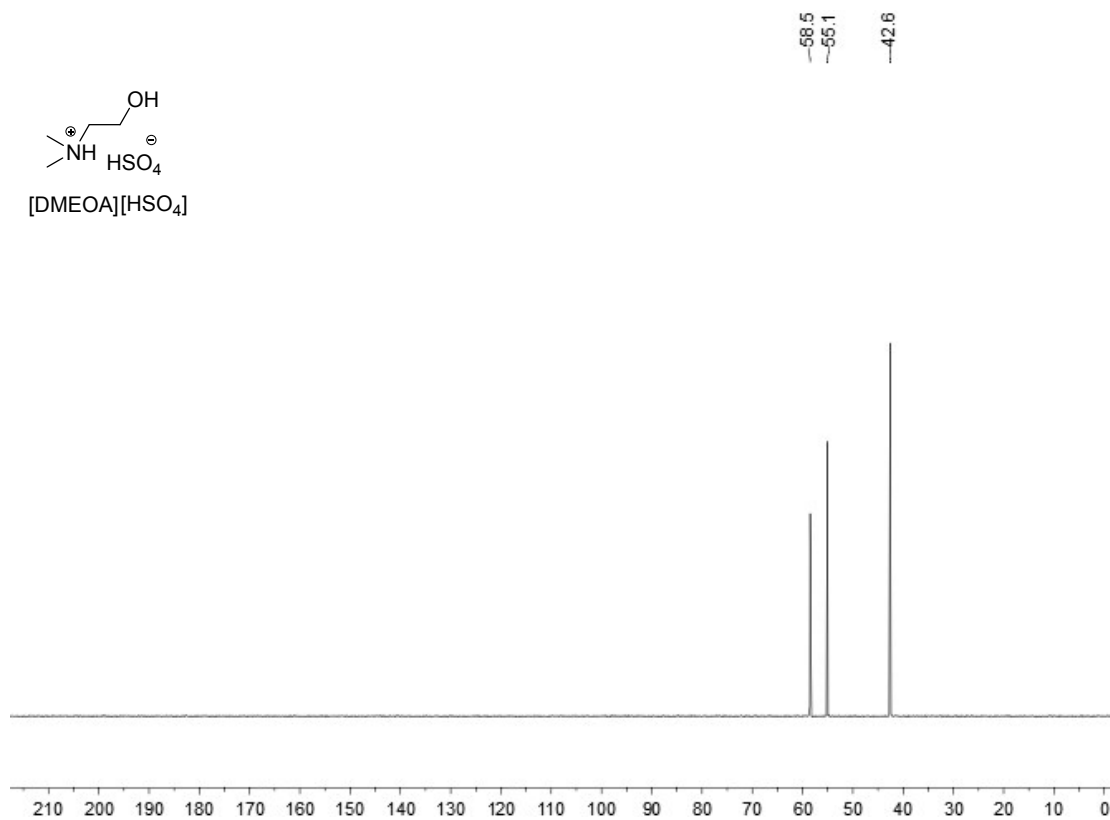

18.

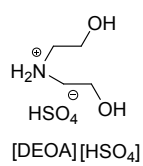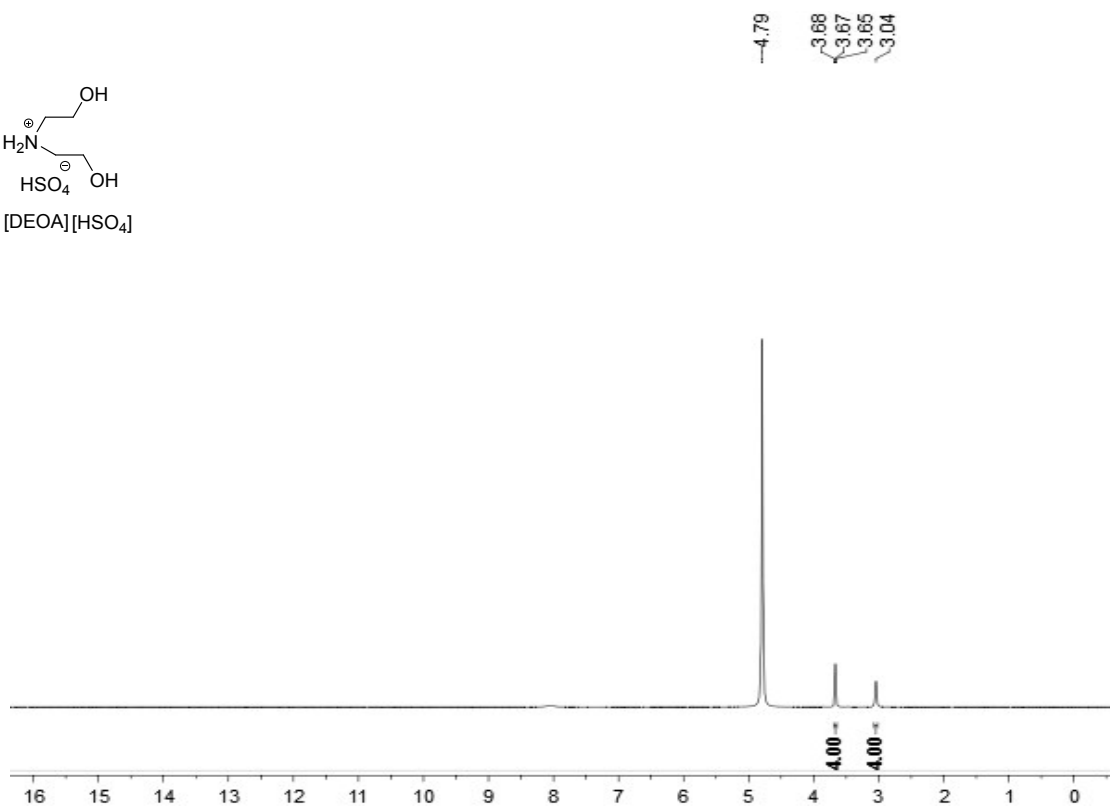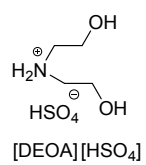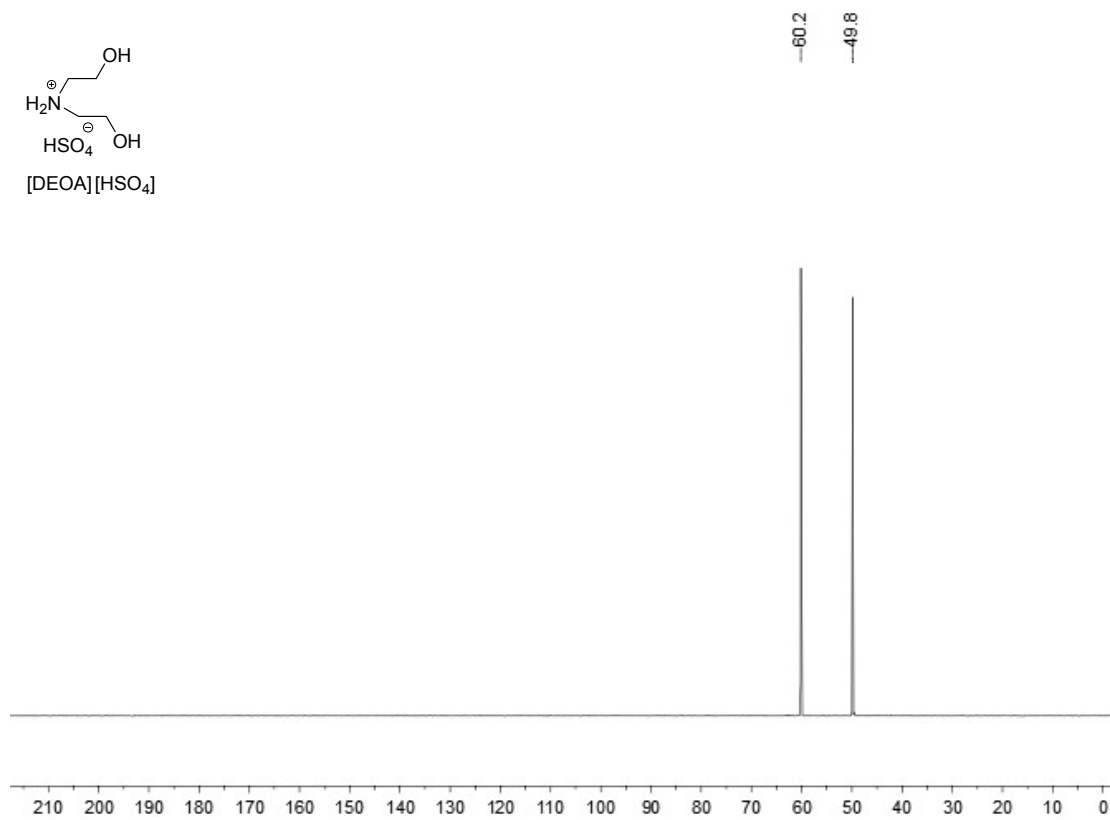

19.

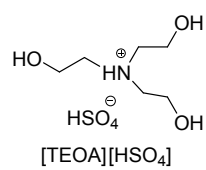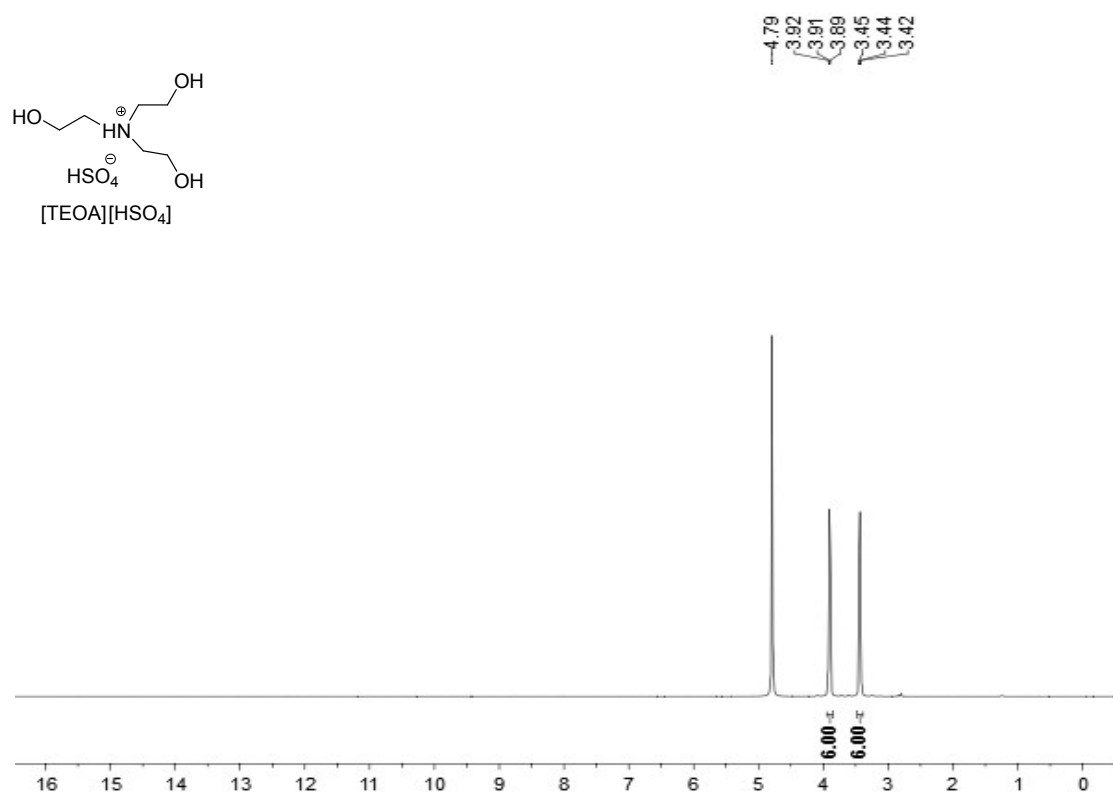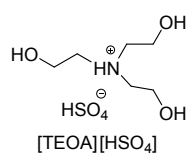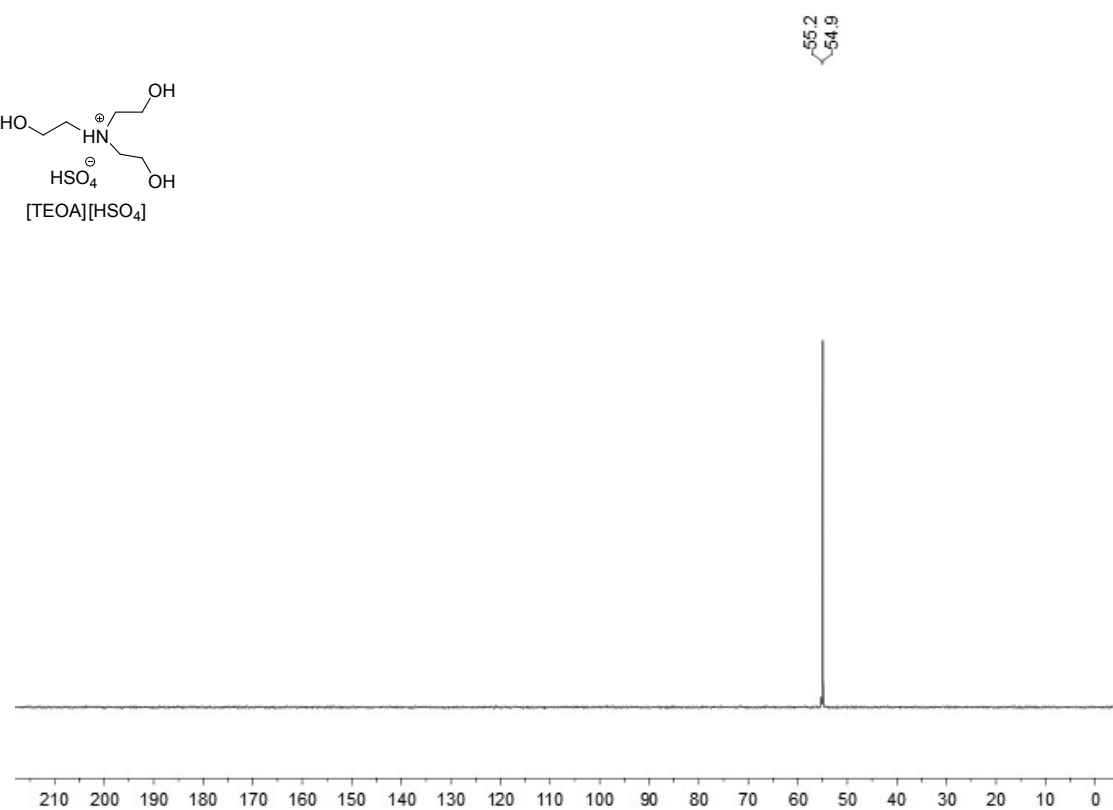

20.

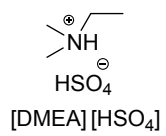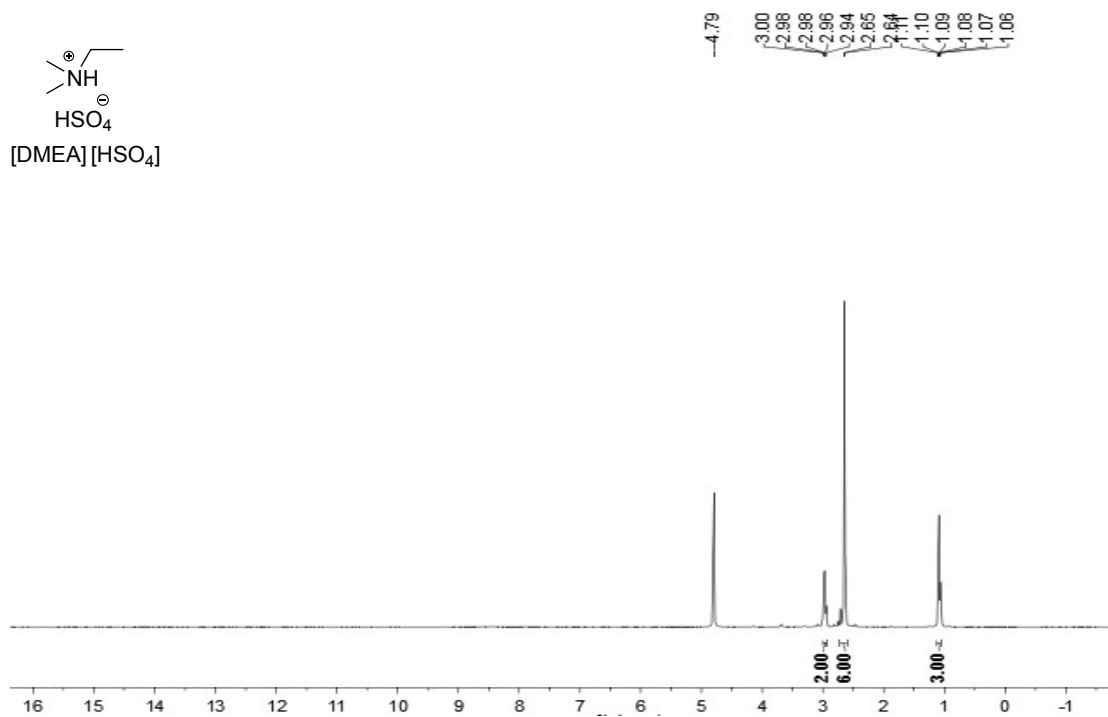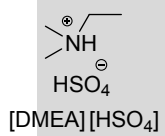

21.

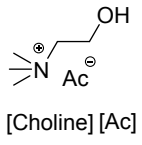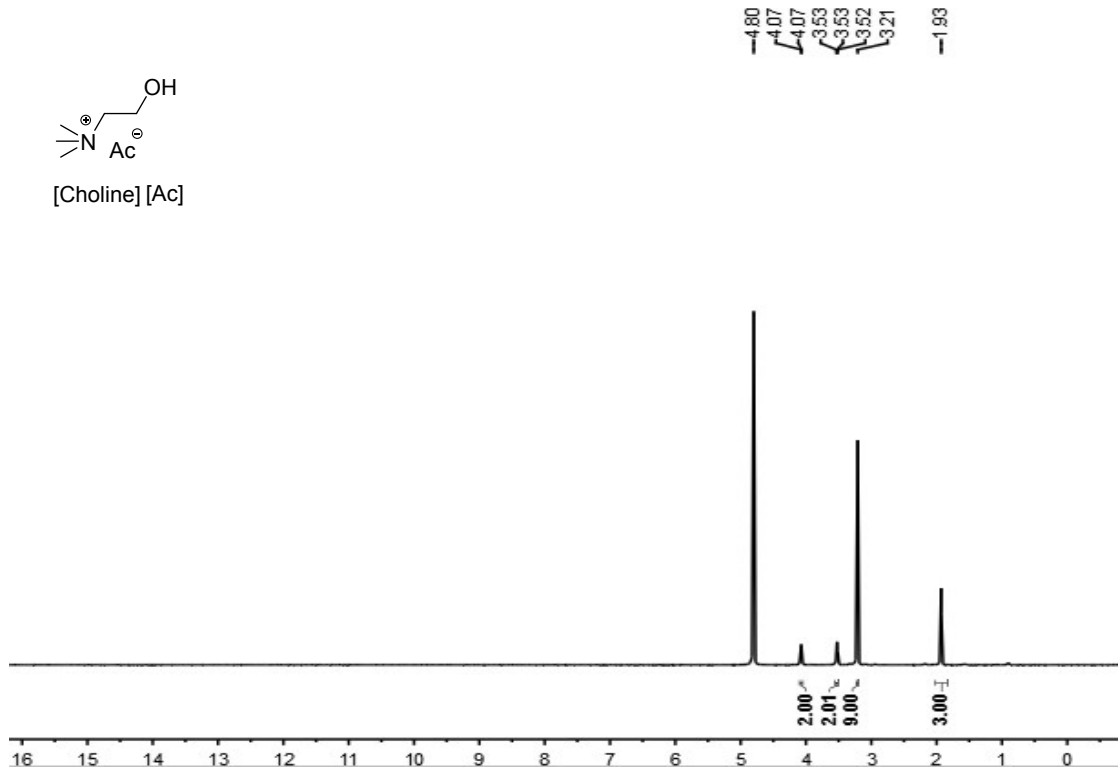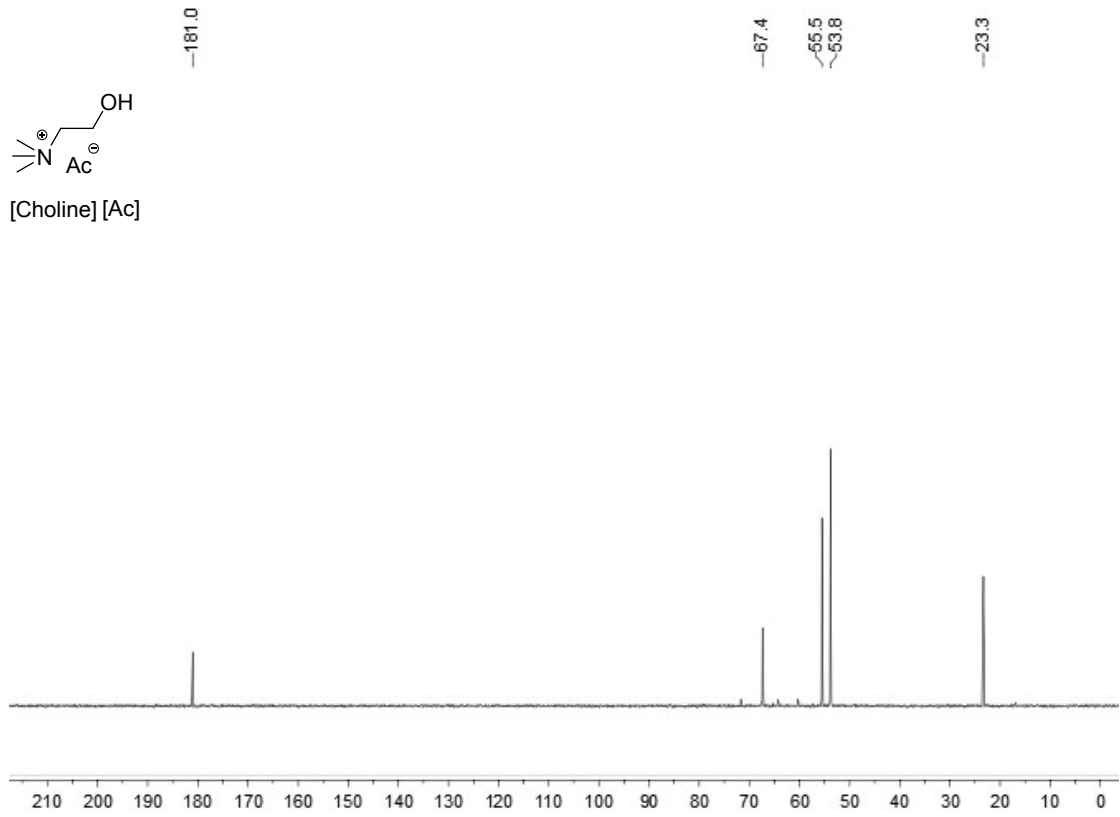

22.

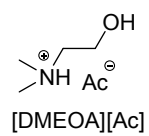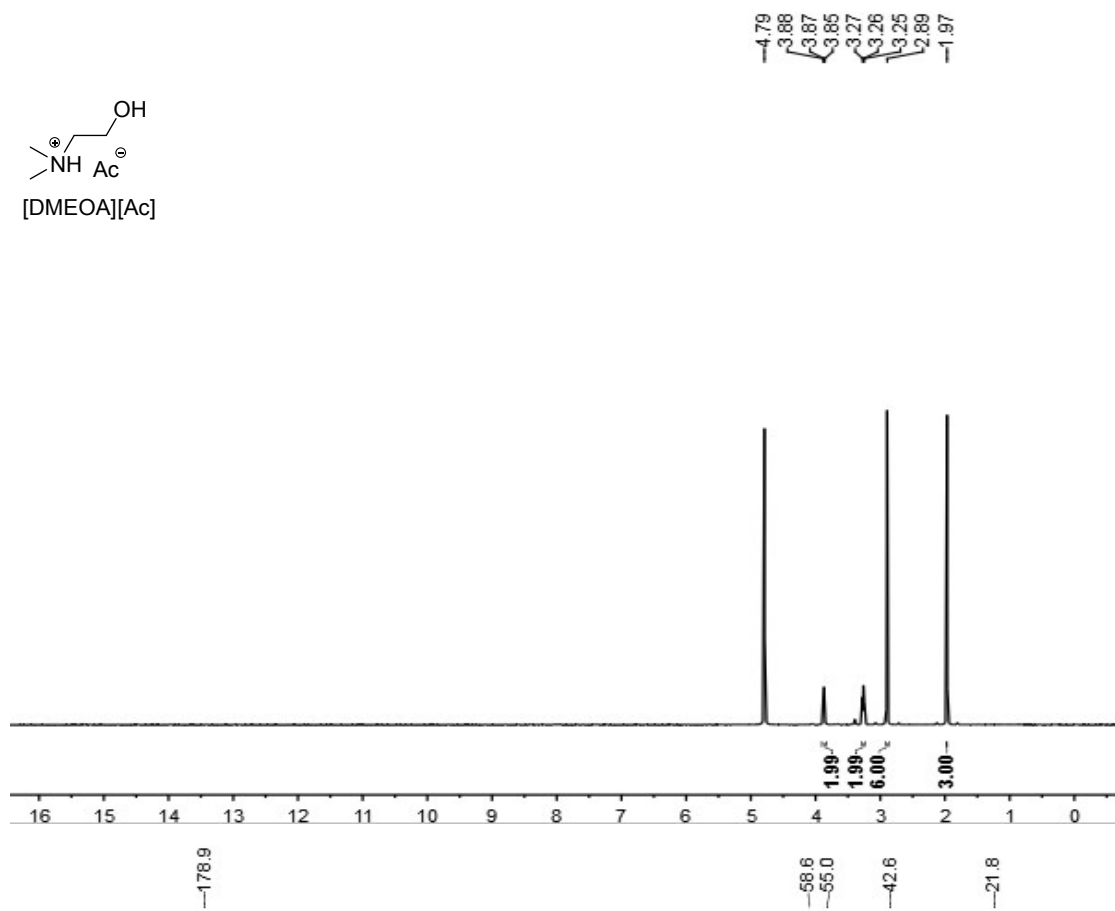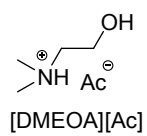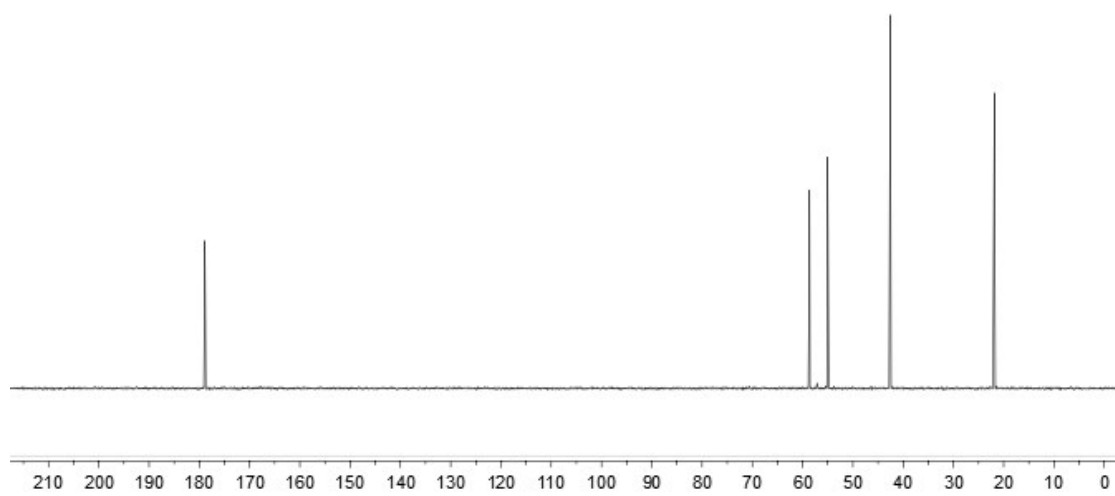

23.

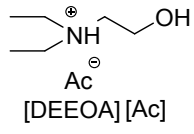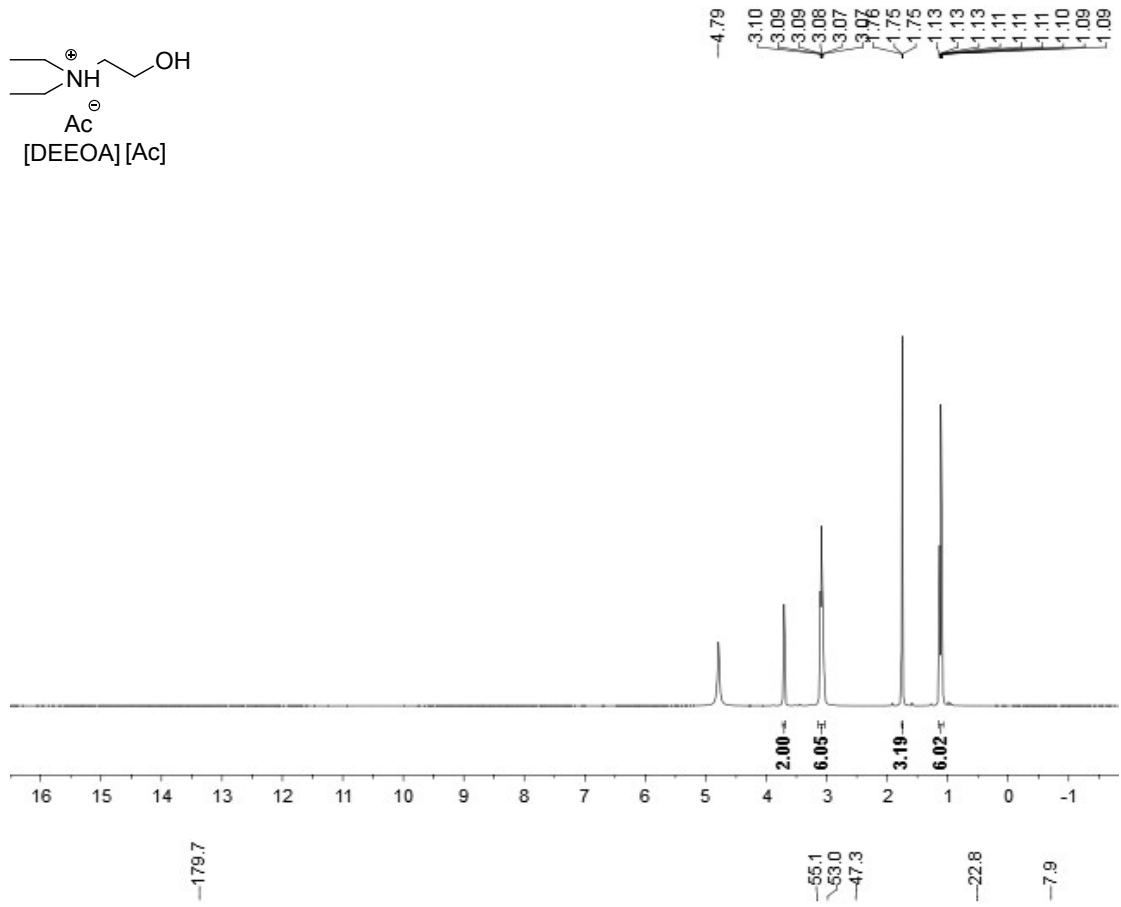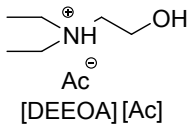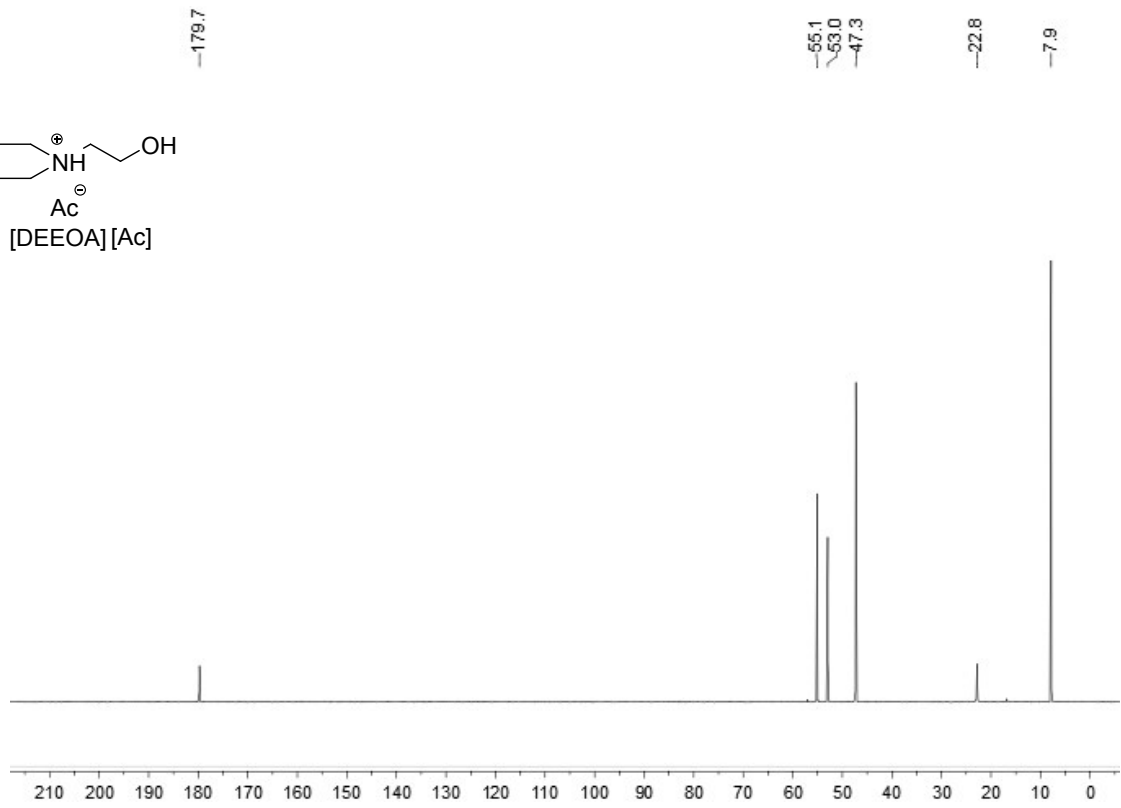



24.

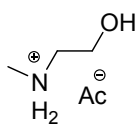

[MEOA][Ac]

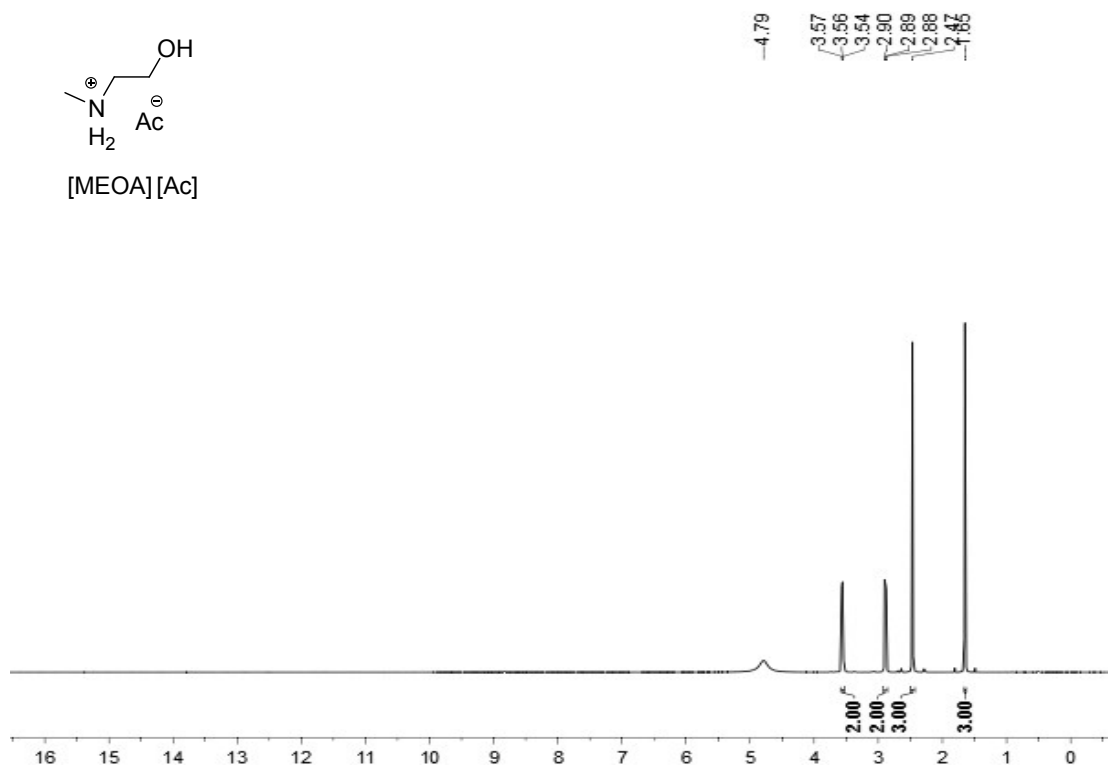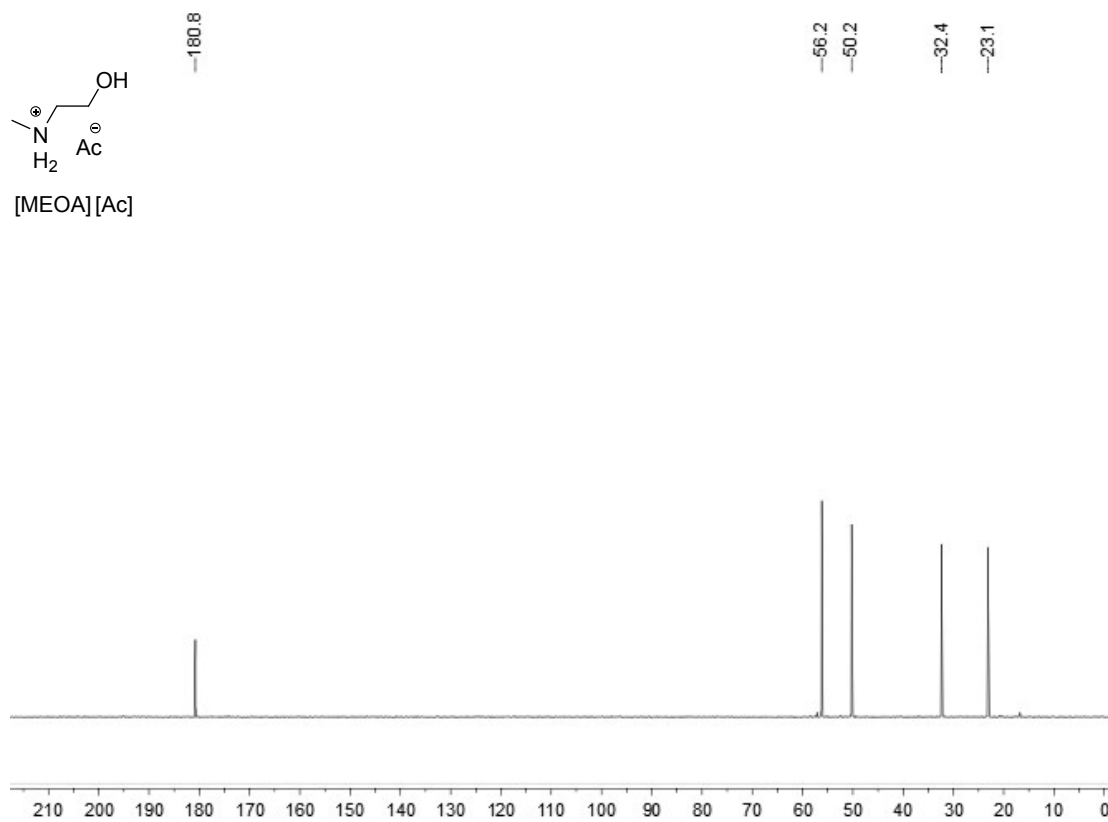

25.

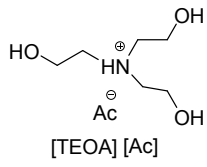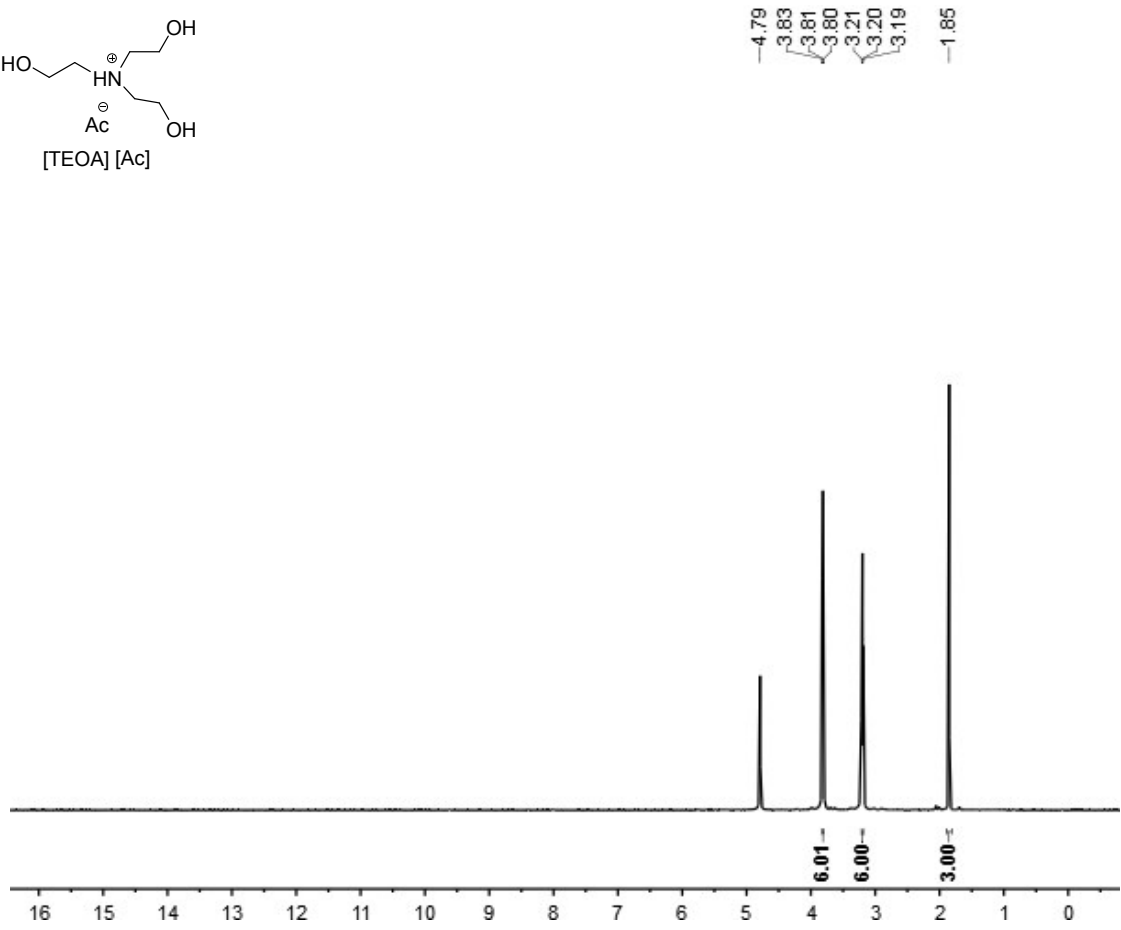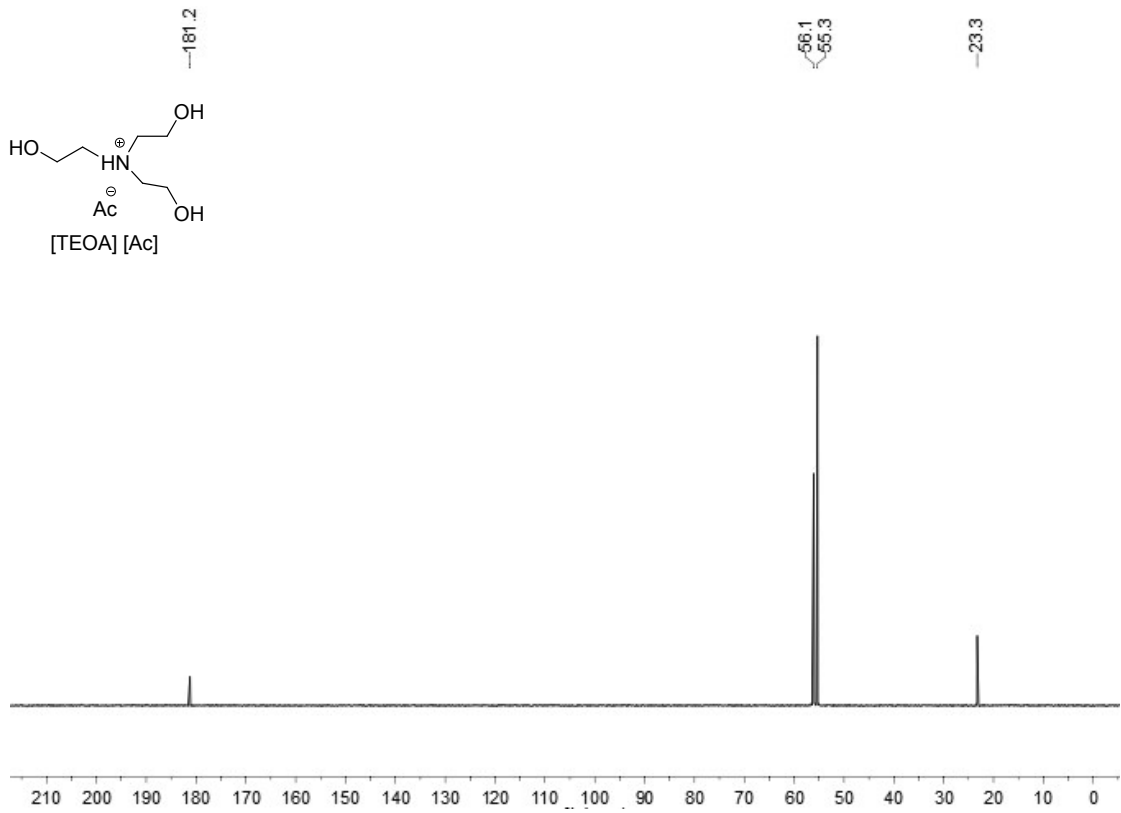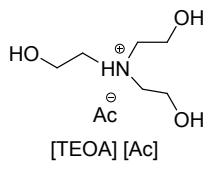

26.

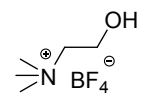

[Choline][BF<sub>4</sub>]

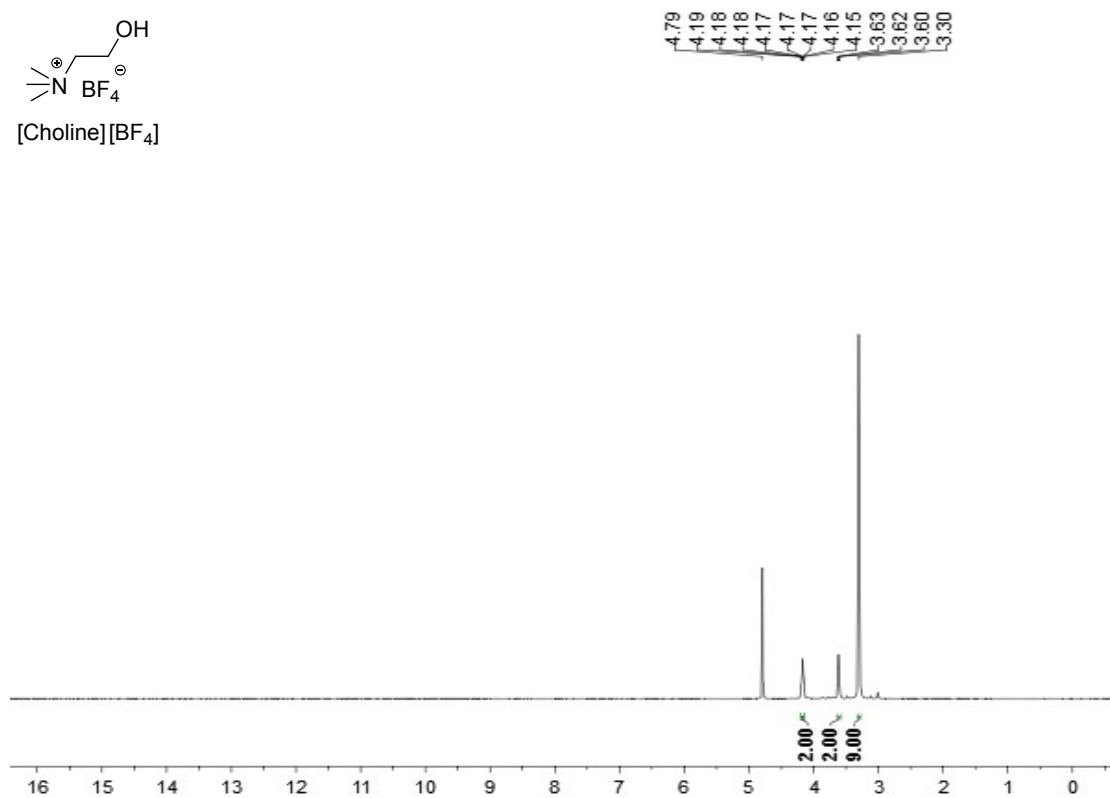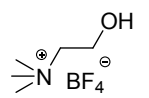

[Choline][BF<sub>4</sub>]

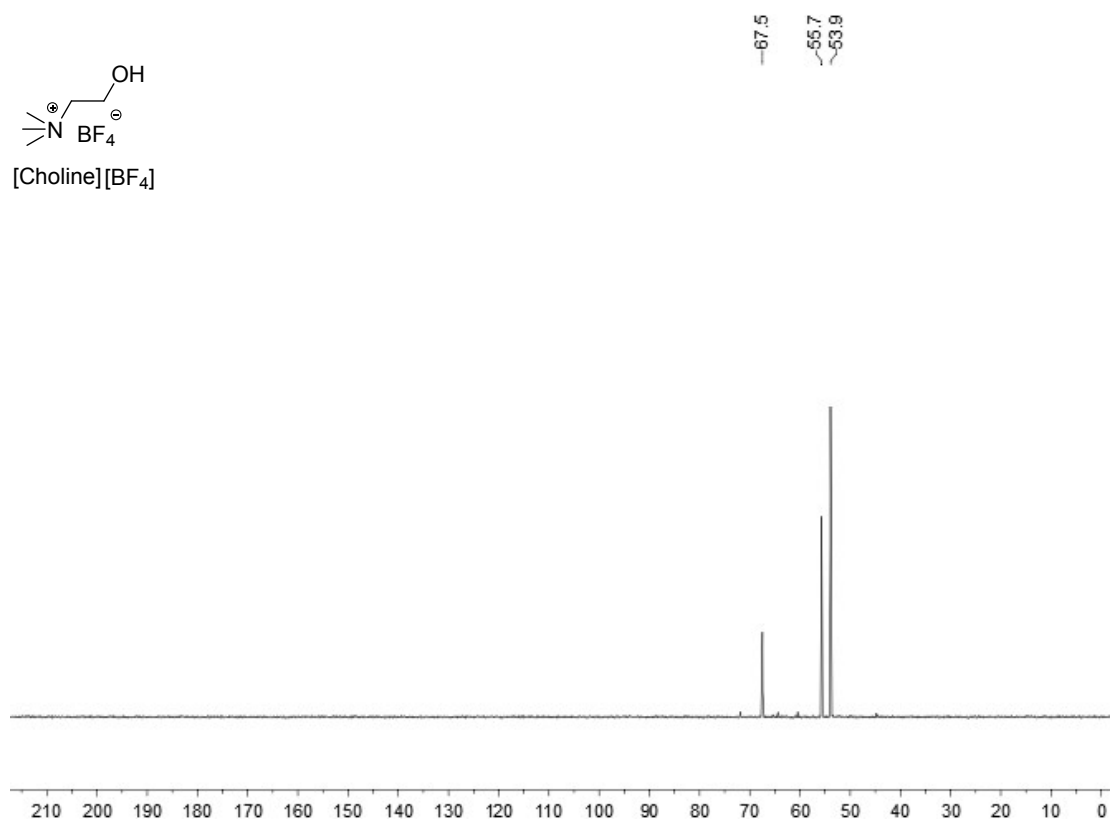

27.

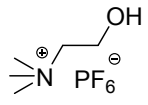

[Choline][PF<sub>6</sub>]

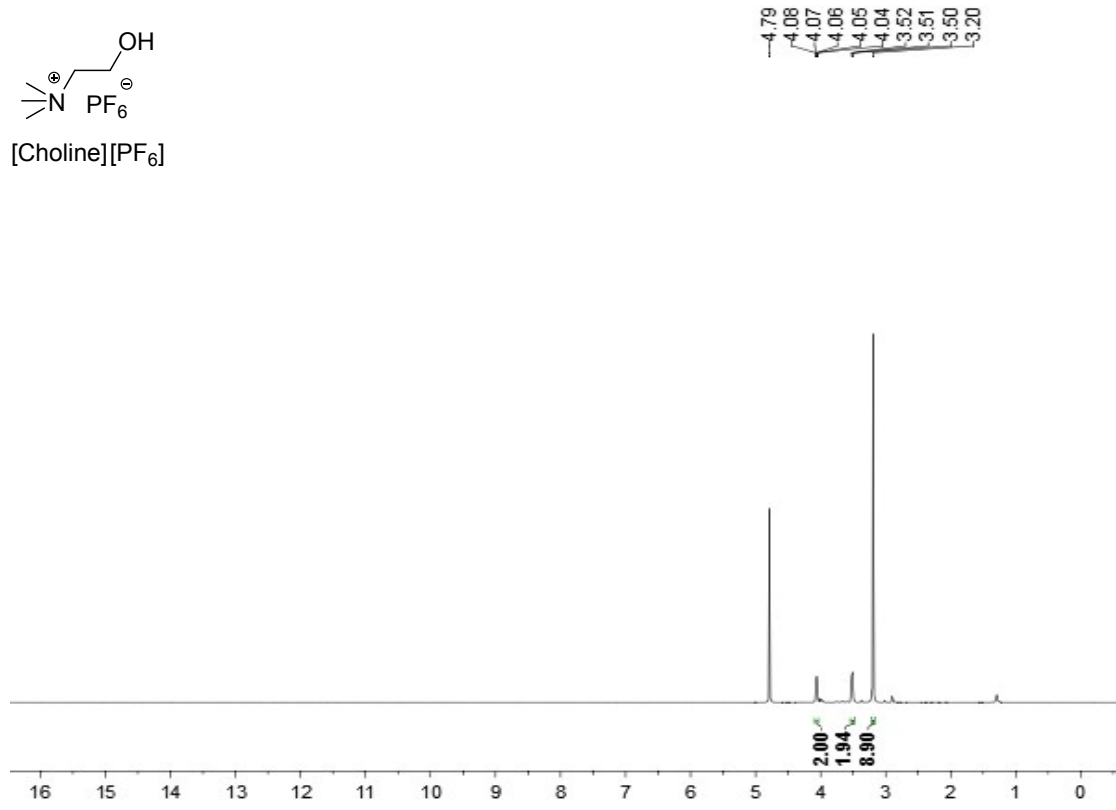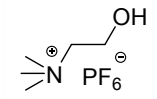

[Choline][PF<sub>6</sub>]

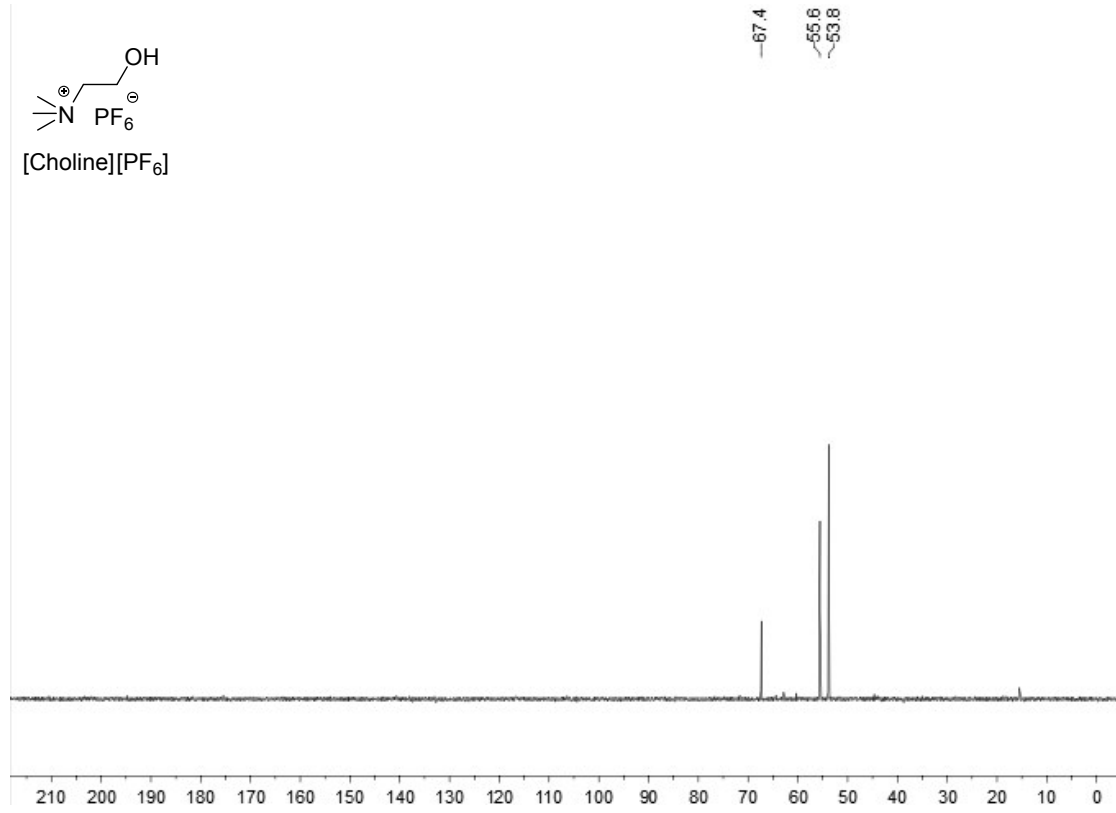

28.

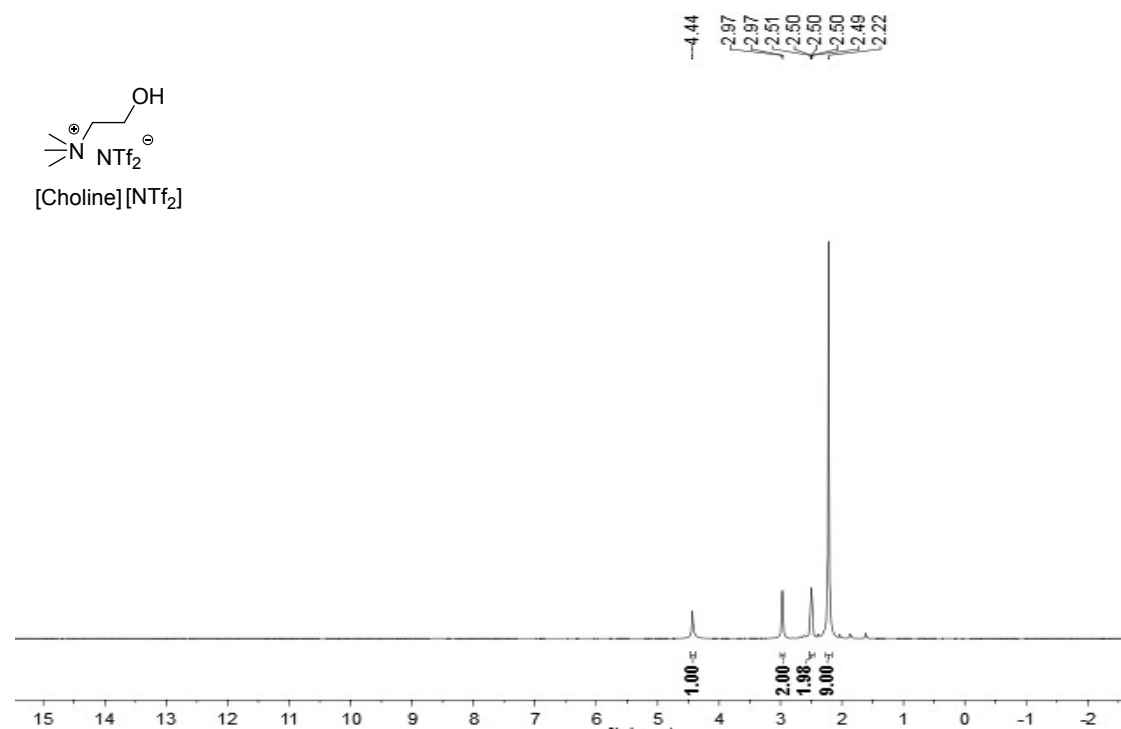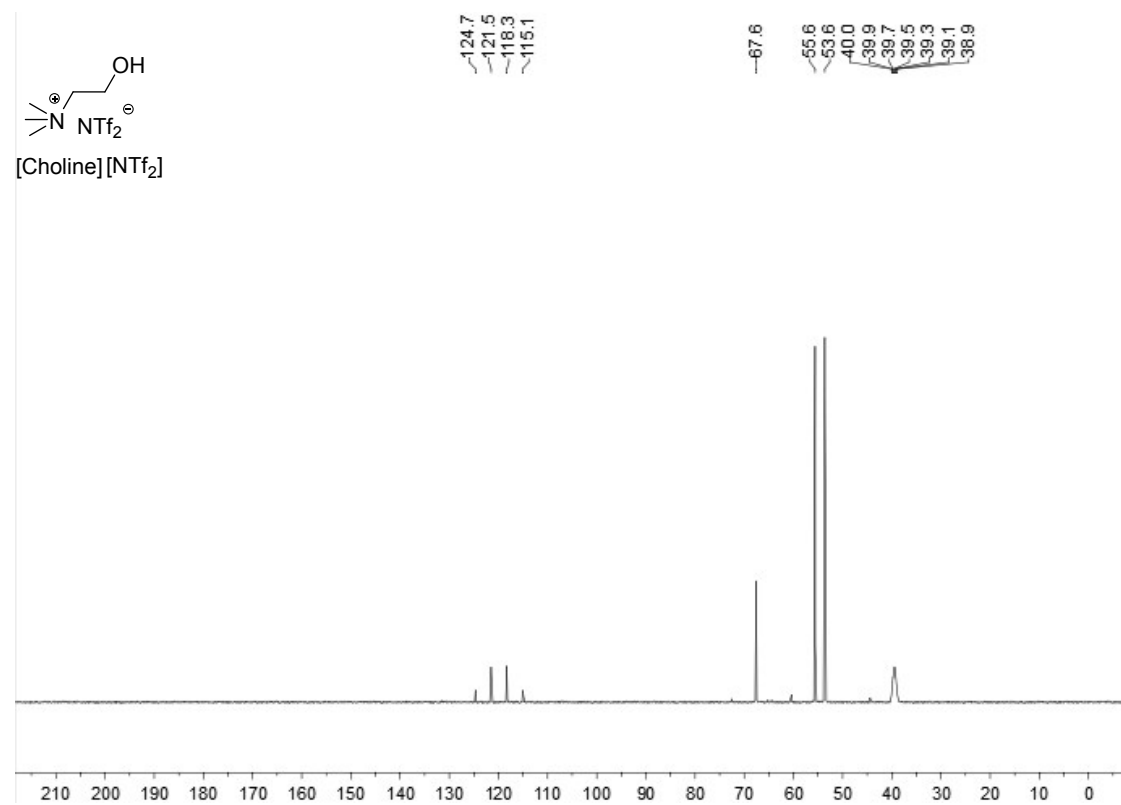

29.

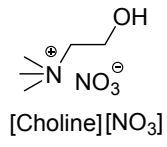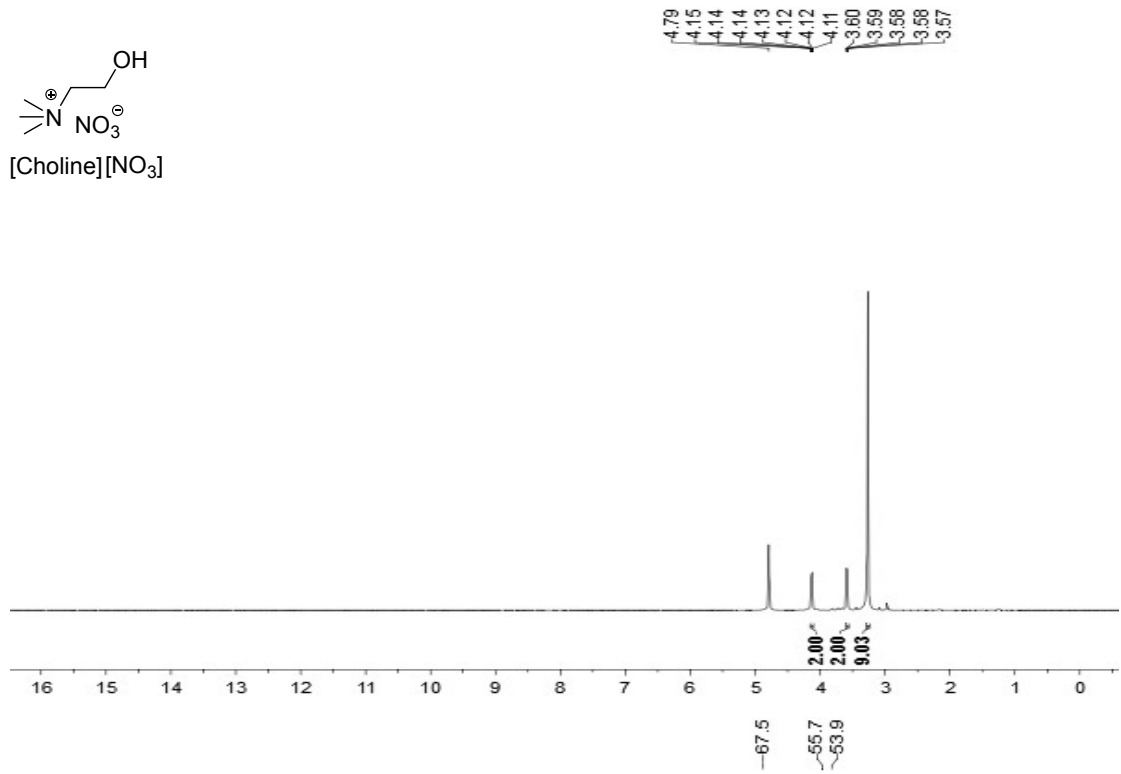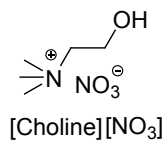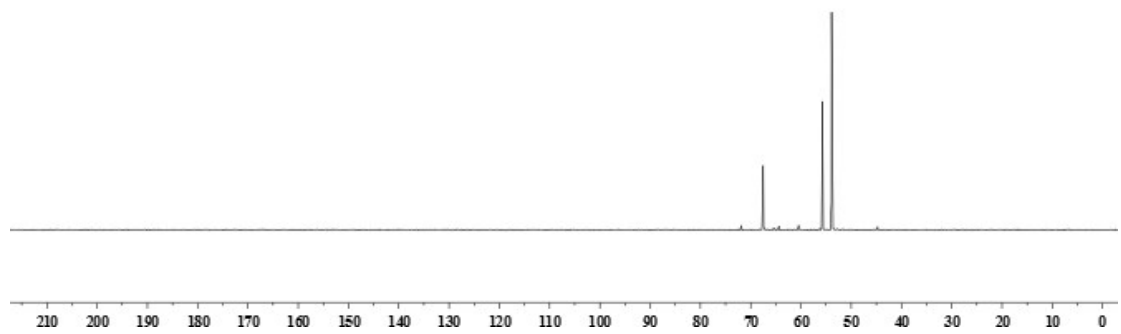

30.

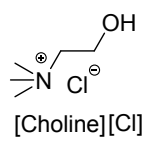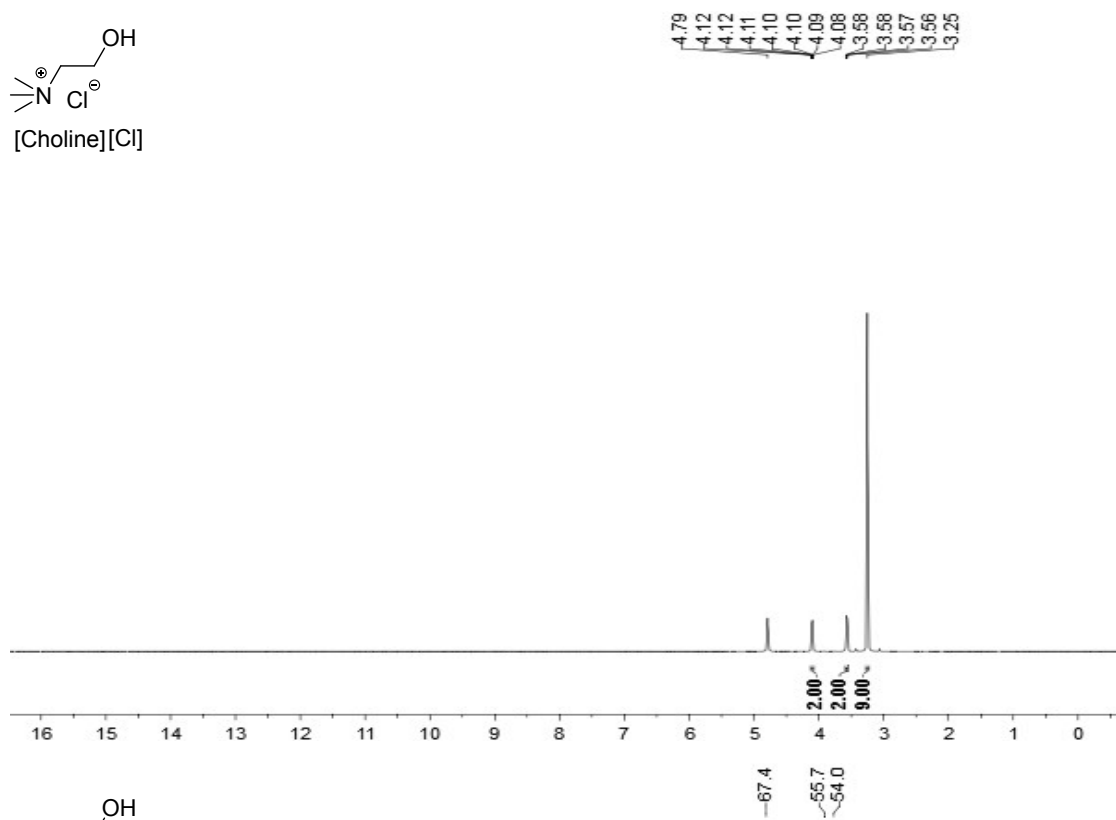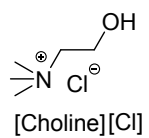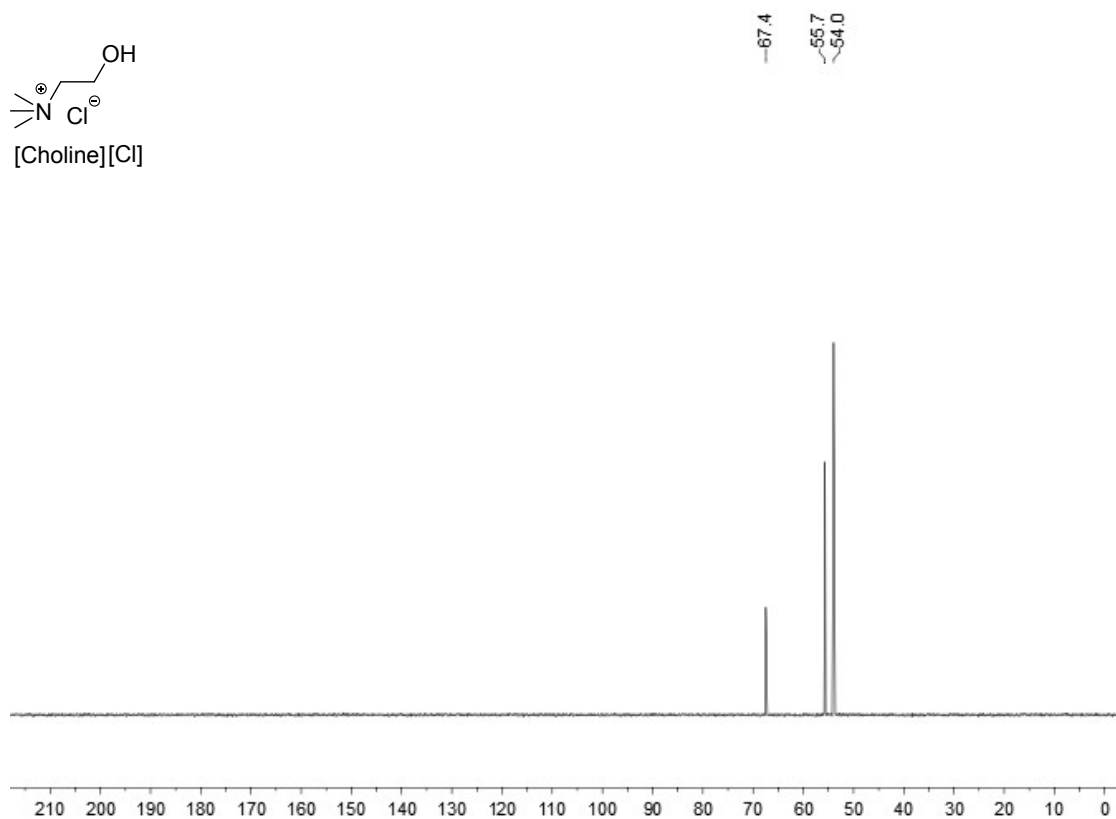

31.

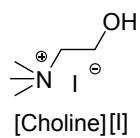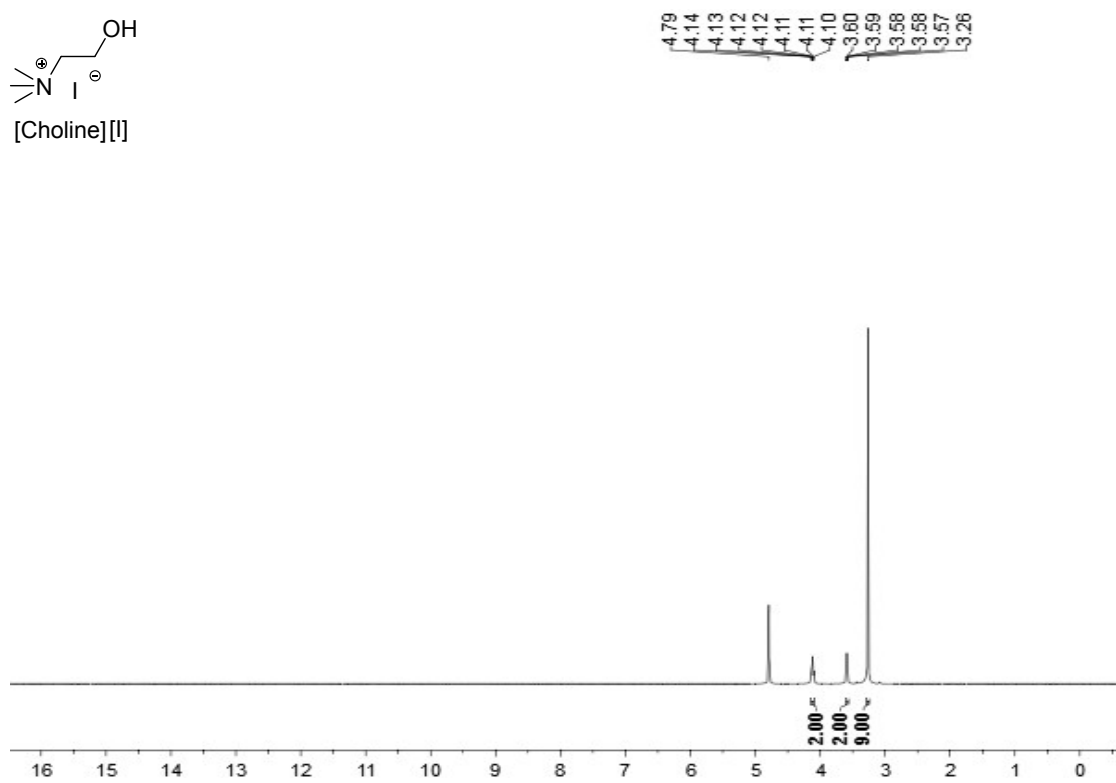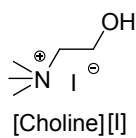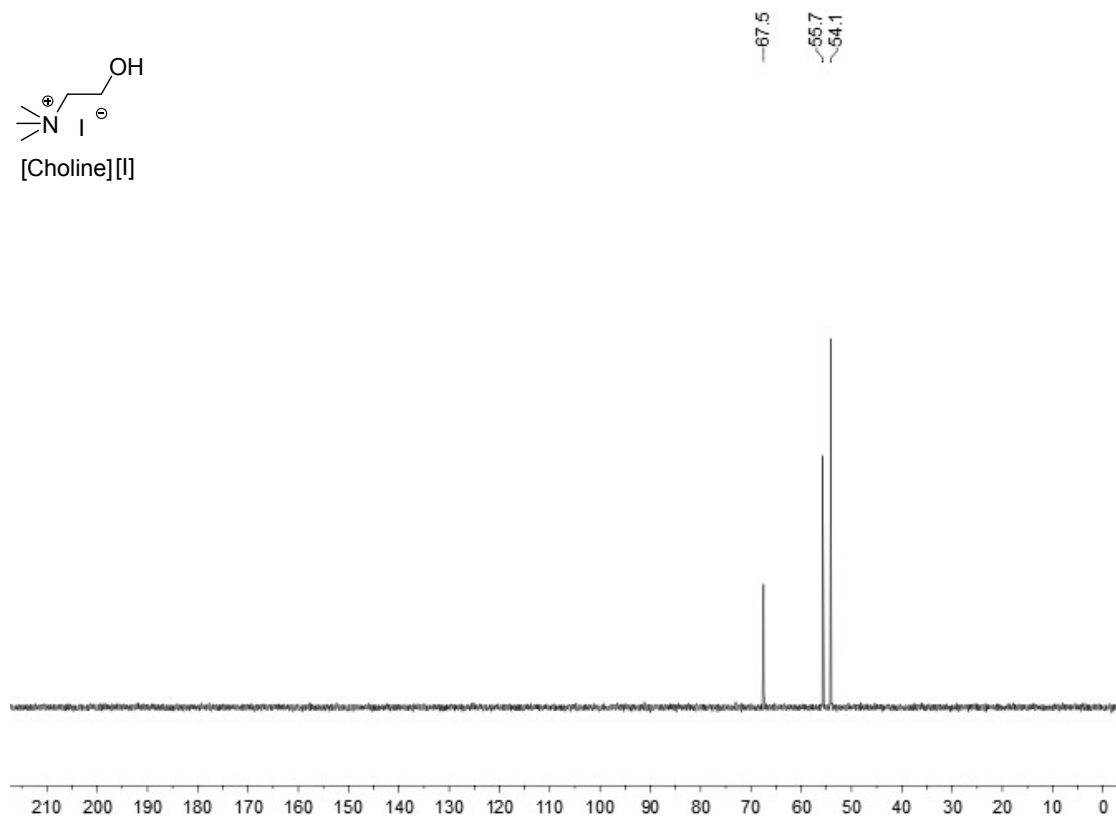

32.



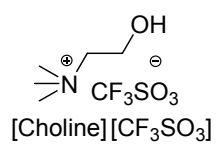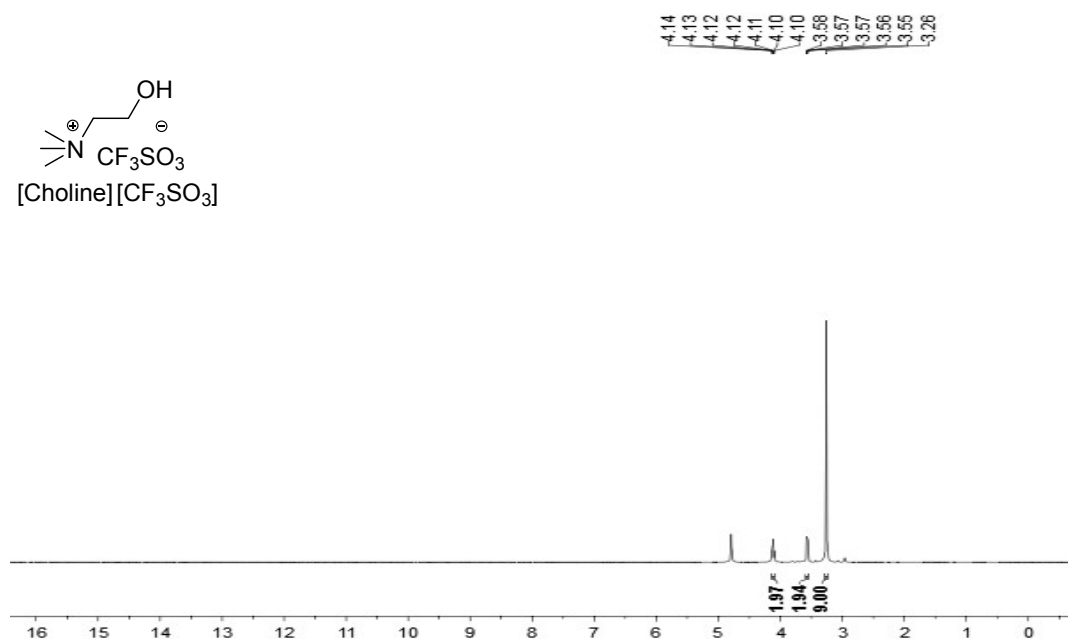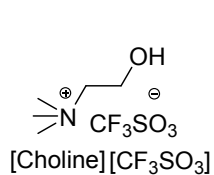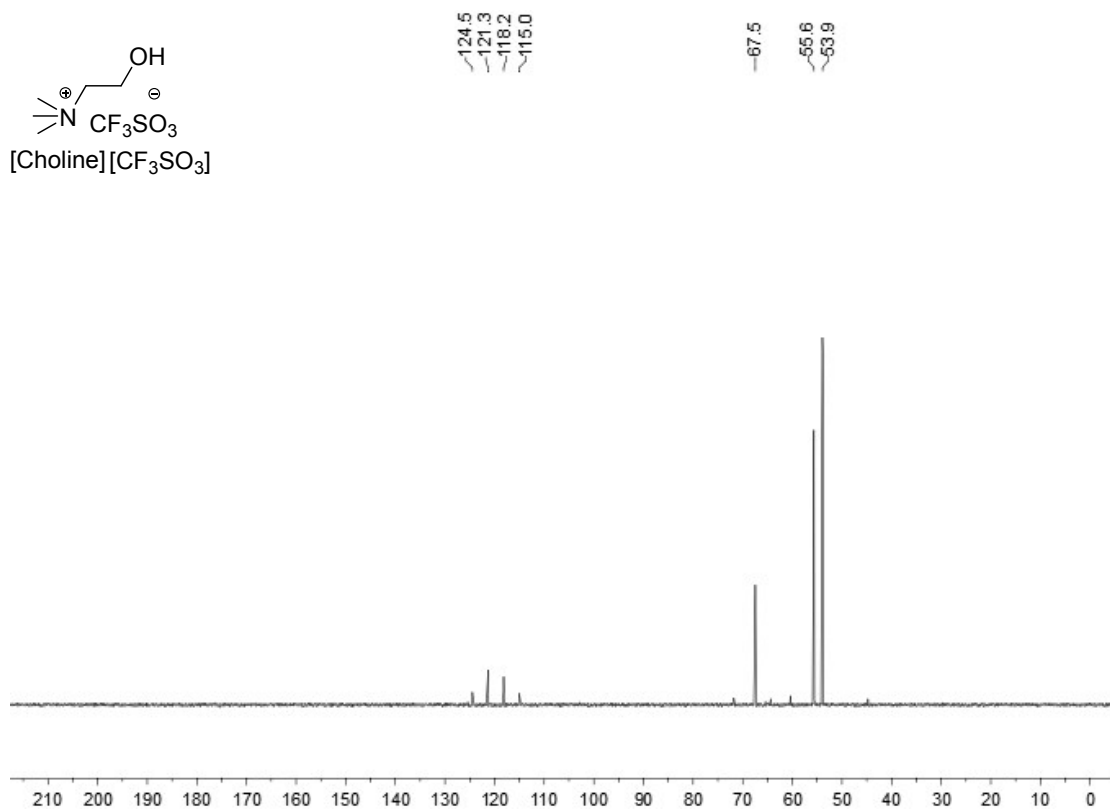

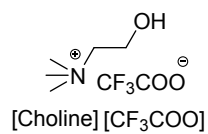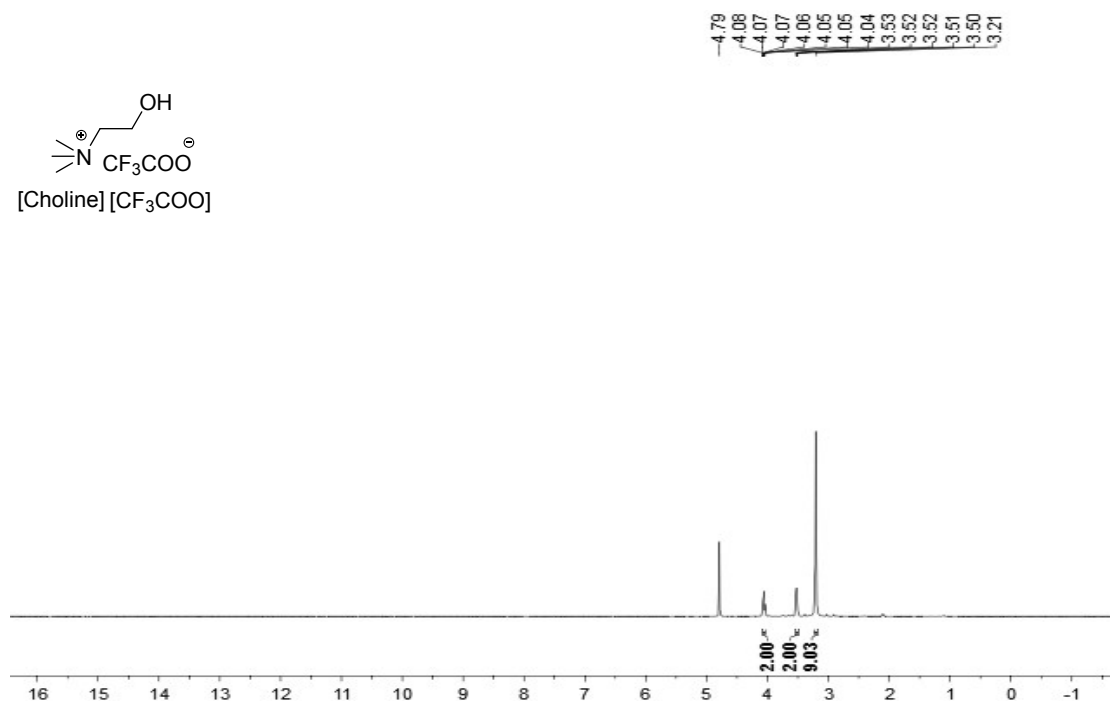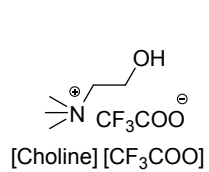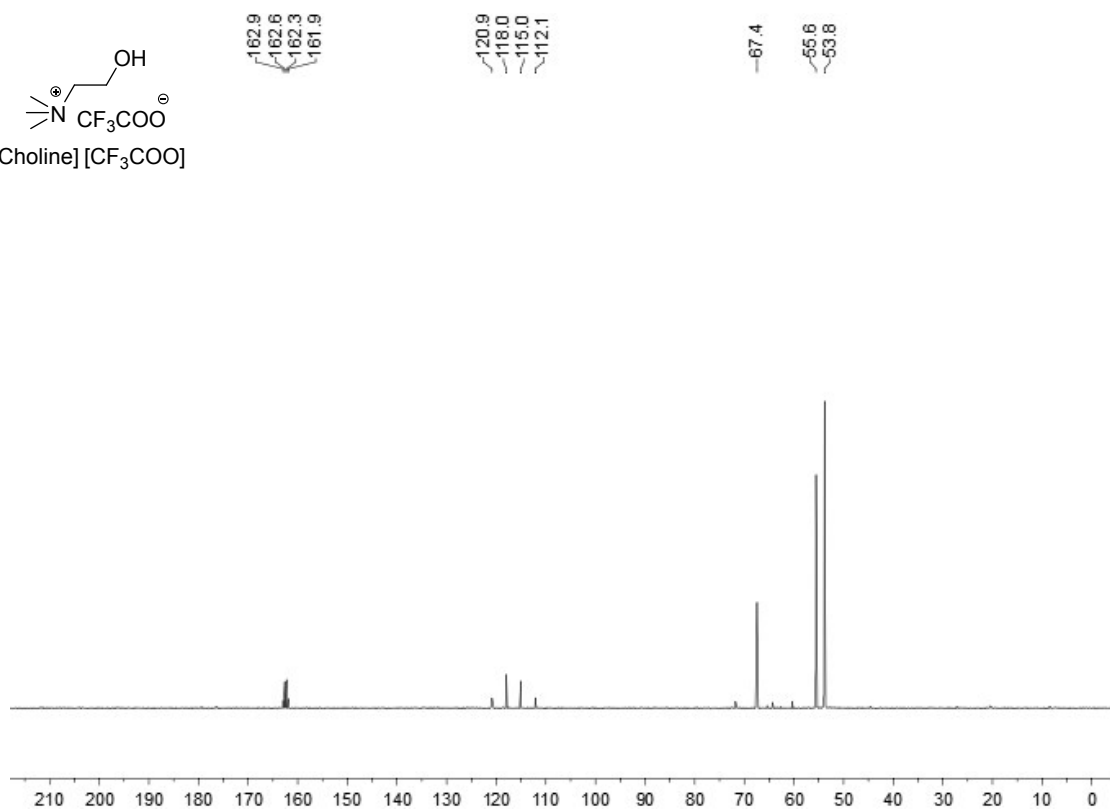

Component 1

The standard mass spectrum

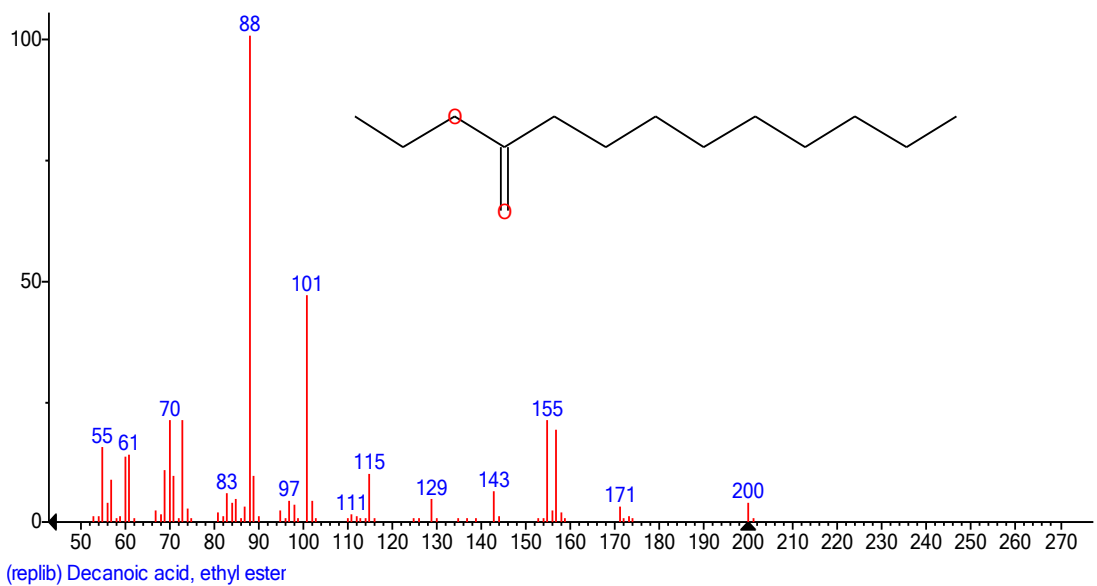

Mass Spectrum of the detected sample

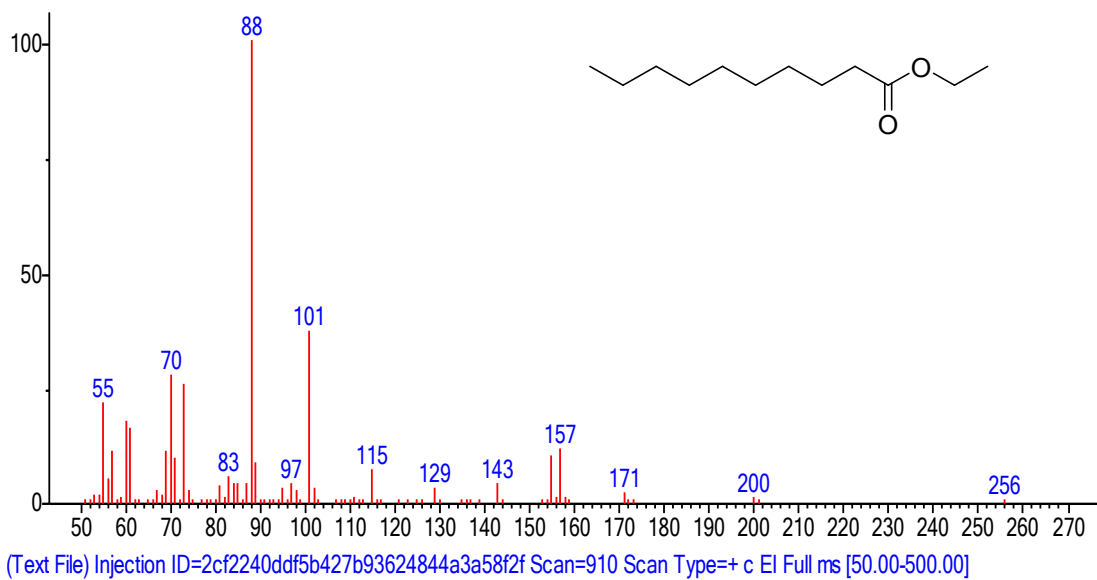

Component 2

The standard mass spectrum

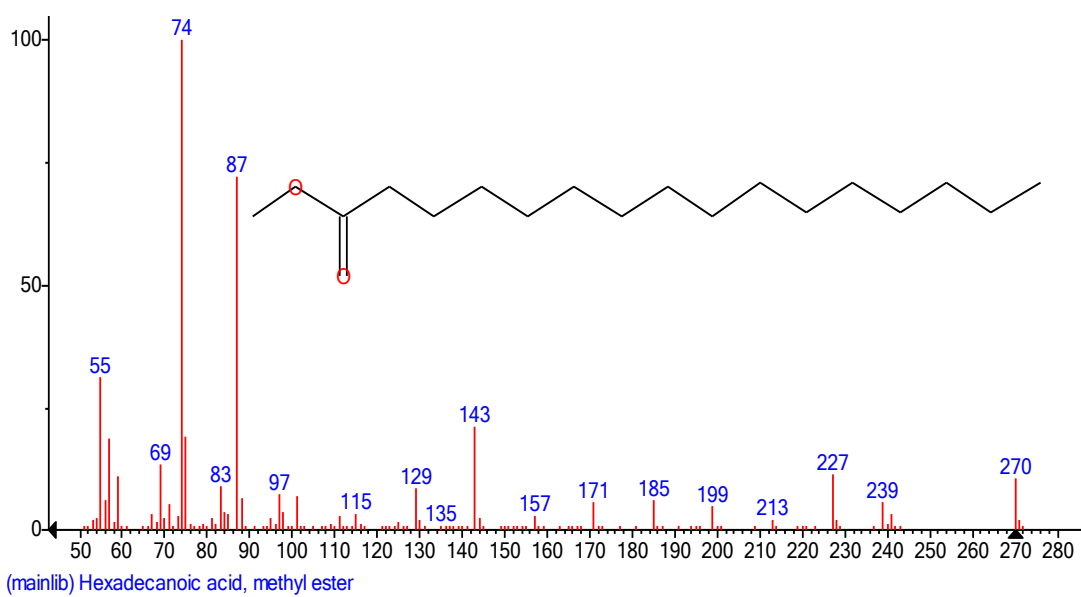

Mass Spectrum of the detected sample

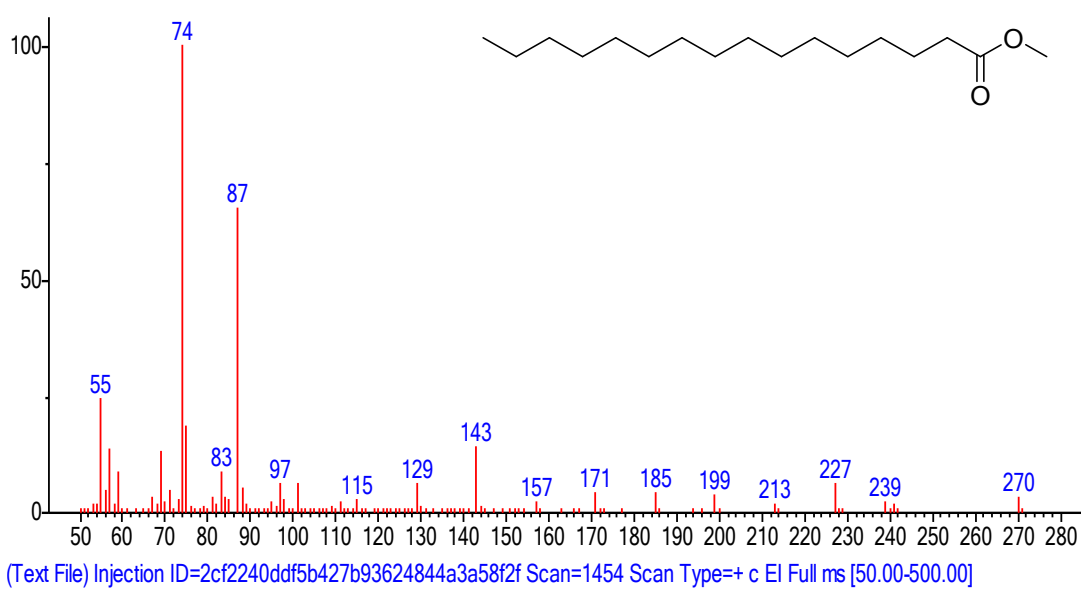

### Component 3

The standard mass spectrum

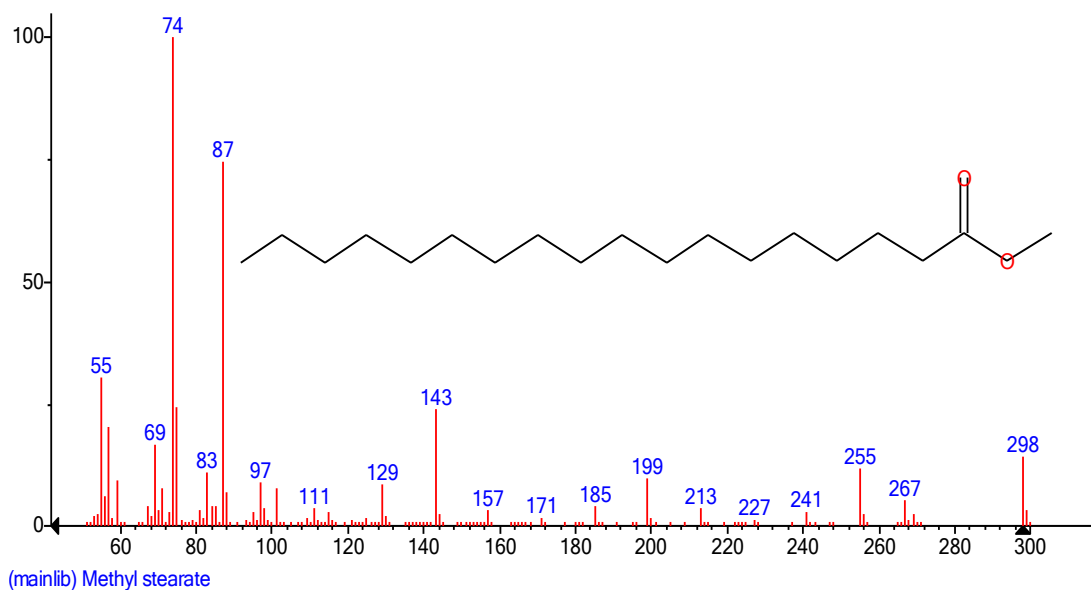

Mass Spectrum of the detected sample

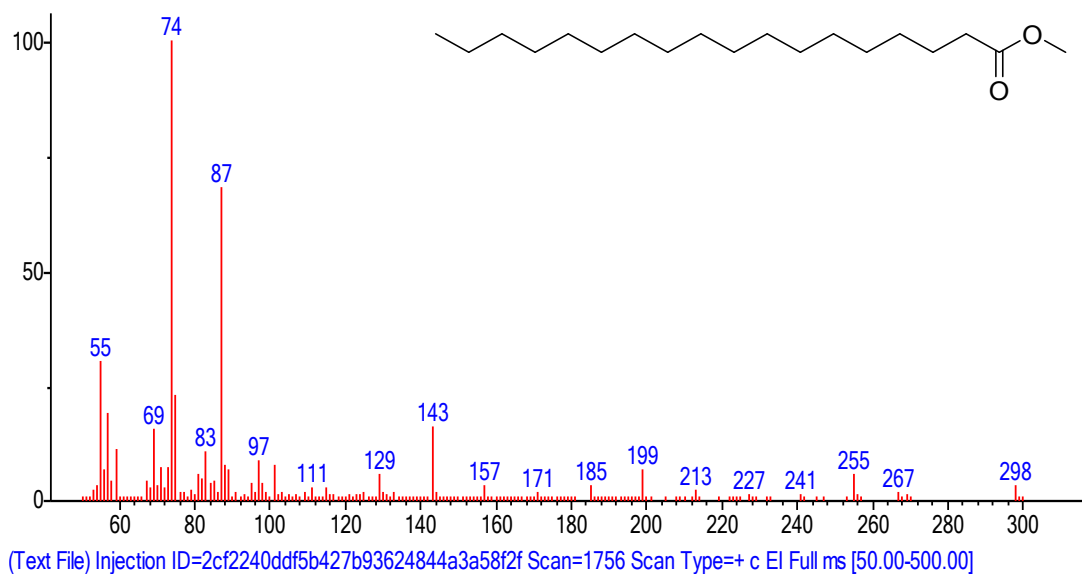

### Component 4

The standard mass spectrum

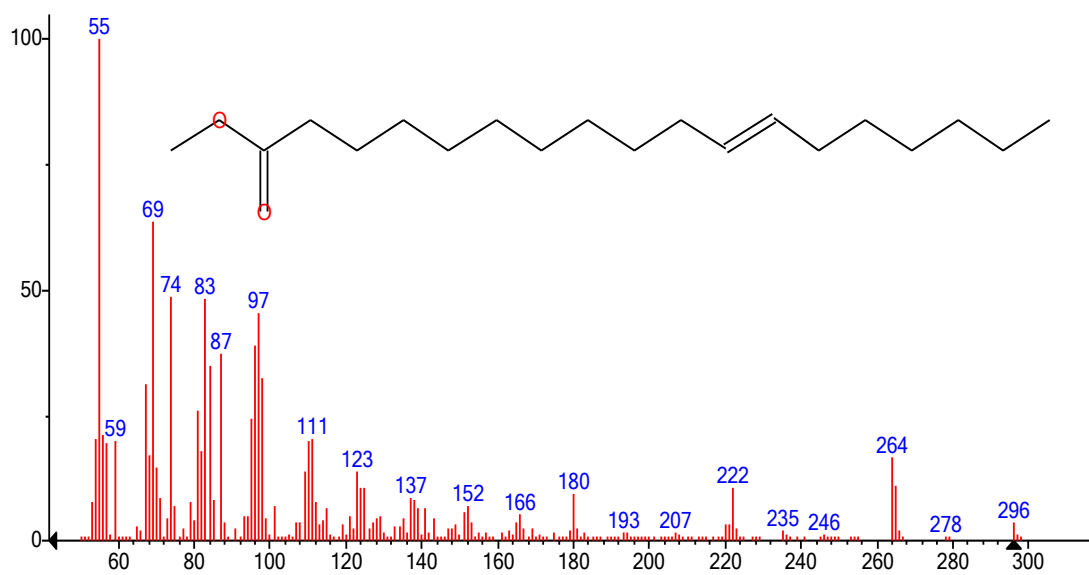

(replib) 11-Octadecenoic acid, methyl ester

Mass Spectrum of the detected sample

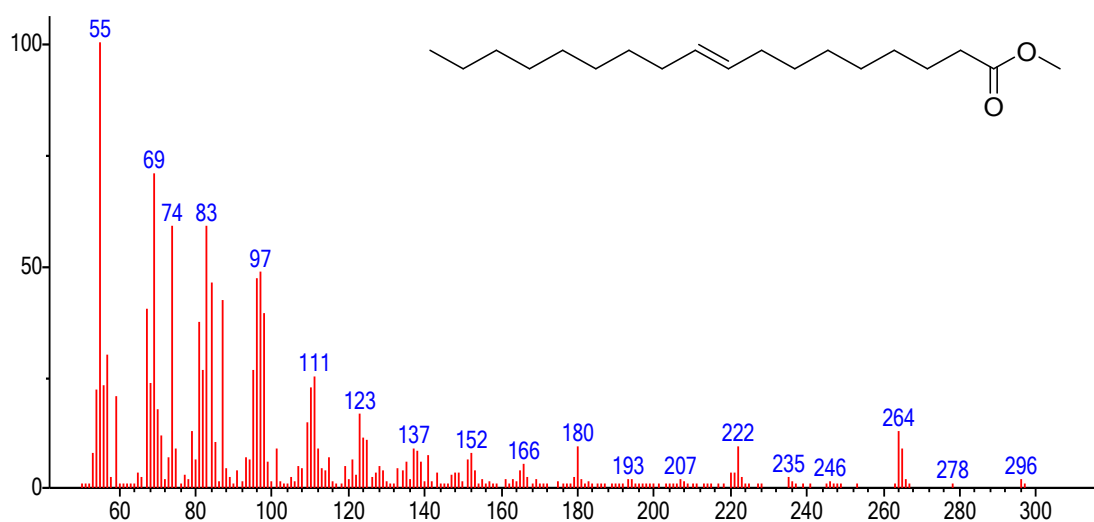

(Text File) Injection ID=2cf2240ddf5b427b93624844a3a58f2f Scan=1803 Scan Type=+ c EI Full ms [50.00-500.00]

Component 5

The standard mass spectrum

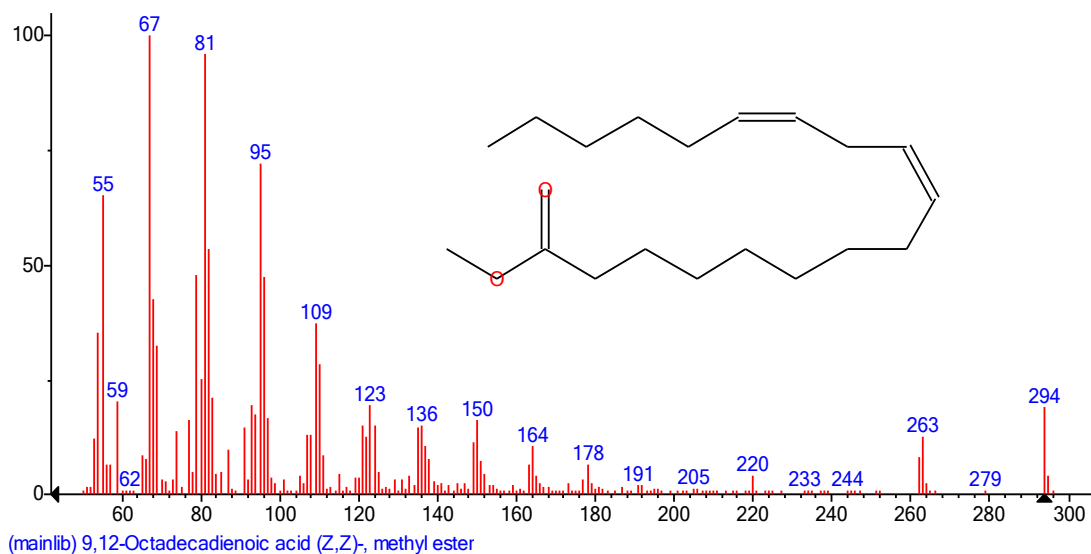

Mass Spectrum of the detected sample

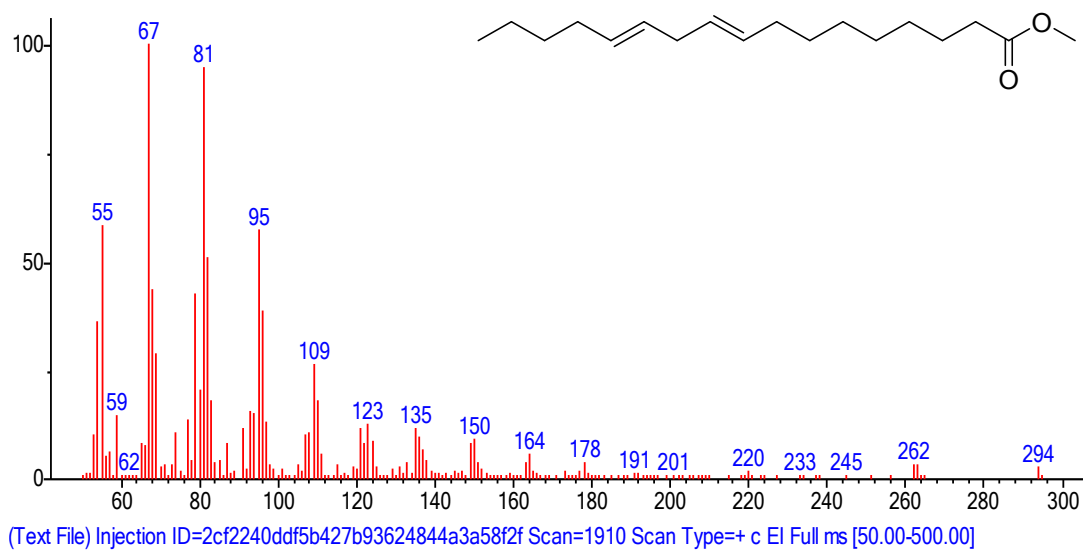

### Component 6

The standard mass spectrum

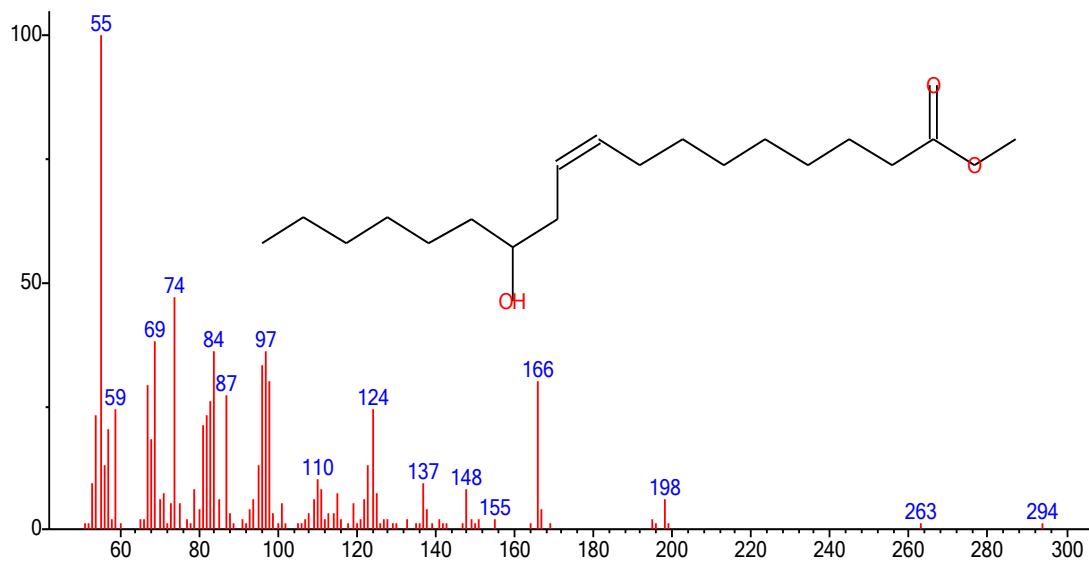

(mainlib) Methyl 12-hydroxy-9-octadecenoate

Mass Spectrum of the detected sample

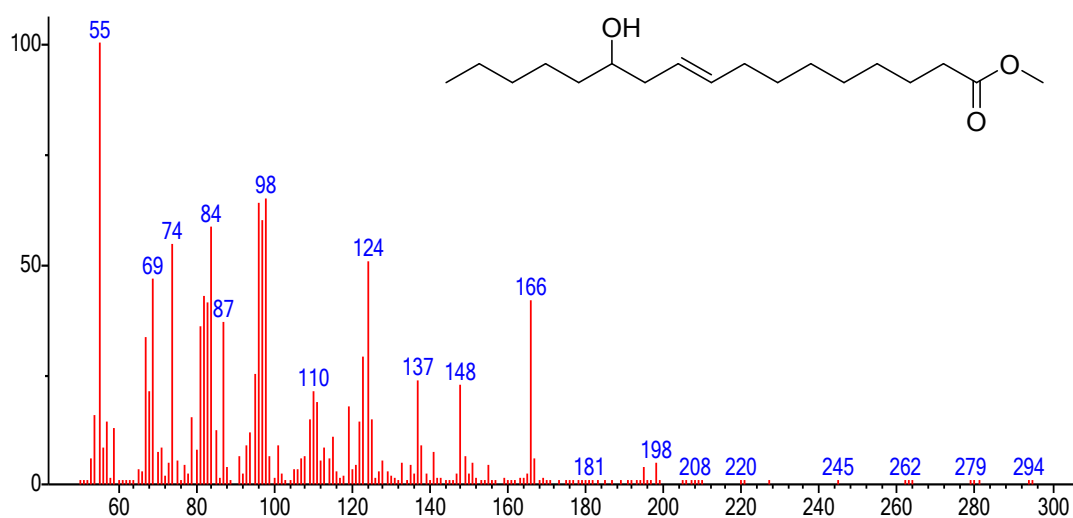

(Text File) Injection ID=d2a94e86f8dd46fcb99b465f57b49e0e Scan=3049 Scan Type=+ c EI Full ms [50.00-400.00]
